# Supplementary material
Source: publisher figshare collection journal article supplement (https://tandf.figshare.com/ndownloader/files/13152473)
Supplement: Supplementary file 1 [file 13152473]

## Sheet: Details
1) cyp19_methylation
DNA methylation of gonadal aromatase. This is the output of the basic bionformatic process and is structured as following:
Sample name, chromosome, position of CpG, methylated Cs, unmethylated Cs.
2) other_genes_methylation
DNA methylation of other genes important for sexual development. This is the output of the basic bionformatic process and is structured as following:
Sample name, chromosome, position of CpG, strand, methylated Cs, unmethylated Cs.
3) cyp19_sb_genome
Genomic coordinates of the CpGs of the gonadal aromatase amplicon with columns:
Chromosome of the CpG, start position of the CpG, end position of the CpG, chromosome of the amplicon, start position of the amplicon, end position of the amplicon, strand, transcript ID, gene name, gene symbol, amplicon width.
4) othergenes_sb_genome
Genomic coordinates of the other genes important for sexual development with columns:
Chromosome, start position of the amplicon, end position of the amplicon, strand, transcript ID, gene name, gene symbol
5) sample_codes
Correspondence of the sample name with the sex, temperature experienced during development, genetic background (female or male prone) and tank
6) sire_codes
Correspondence of the sample name with the sire code (Code_Father), sex and temperature experienced during development
7) GE
Gene expression data of gonadal aromatase. This sheet includes the sire, sample name, sex, temperature experienced during early development and the dCq values in -dCq and 2^dCq formats.

## Sheet: cyp19_methylation
Sample	Chromosome	Position	Methylated Cs	Unmethylated Cs
HAVM19	LG5	21022164	835	1
HAVM19	LG5	21022215	1367	124
HAVM19	LG5	21022236	566	161
HAVM19	LG5	21022256	632	99
HAVM19	LG5	21022272	410	276
HAVM19	LG5	21022279	575	150
HAVM19	LG5	21022305	0	100
HAVM19	LG5	21022652	64	1
HAVM19	LG5	21023742	2771	13
HAVM38	LG5	21022164	760	6
HAVM38	LG5	21022215	2227	1331
HAVM38	LG5	21022236	1994	1522
HAVM38	LG5	21022256	2080	1438
HAVM38	LG5	21022272	1444	1992
HAVM38	LG5	21022279	1871	1649
HAVM38	LG5	21022305	1	335
HAVM38	LG5	21022646	0	21
HAVM38	LG5	21022652	7281	34
HAVM38	LG5	21023742	181	1
HAVM39	LG5	21022151	0	40
HAVM39	LG5	21022164	3148	8
HAVM39	LG5	21022215	419	5775
HAVM39	LG5	21022236	257	5827
HAVM39	LG5	21022256	227	5830
HAVM39	LG5	21022272	151	5923
HAVM39	LG5	21022279	183	5897
HAVM39	LG5	21022305	1	19
HAVM39	LG5	21022652	35	0
HAVM39	LG5	21023742	770	2
HAVM41	LG5	695342	0	51
HAVM41	LG5	1548107	141	6
HAVM41	LG5	13925514	0	133
HAVM41	LG5	17250797	154	3
HAVM41	LG5	17250803	0	157
HAVM41	LG5	17250809	0	157
HAVM41	LG5	21022151	0	528
HAVM41	LG5	21022164	54172	76
HAVM41	LG5	21022175	0	34
HAVM41	LG5	21022215	54399	782
HAVM41	LG5	21022236	4956	156
HAVM41	LG5	21022256	4979	130
HAVM41	LG5	21022272	4870	211
HAVM41	LG5	21022279	4940	178
HAVM41	LG5	21022305	1	37
HAVM41	LG5	21022652	137	1
HAVM41	LG5	21023742	889	2
HAVM41	LG5	23893415	0	473
HAVM41	LG5	25655902	0	26
HAVM41	LG5	26725733	45	2
HD2	LG5	21022164	19	1
HD2	LG5	21022215	48	2
HD2	LG5	21022236	35	2
HD2	LG5	21022256	35	1
HD2	LG5	21022272	22	13
HD2	LG5	21022279	31	6
HD2	LG5	21022652	75	0
HT1-10	LG5	21022215	31	12
HT1-10	LG5	21022236	32	6
HT1-10	LG5	21022256	21	18
HT1-10	LG5	21022272	23	14
HT1-10	LG5	21022279	30	6
HT1-10	LG5	21022652	61	1
HT1-10	LG5	21023742	79	1
HT1-11	LG5	21022164	46	1
HT1-11	LG5	21022215	1092	199
HT1-11	LG5	21022236	1044	239
HT1-11	LG5	21022256	1038	239
HT1-11	LG5	21022272	759	482
HT1-11	LG5	21022279	941	353
HT1-11	LG5	21022305	0	206
HT1-11	LG5	21022652	1122	2
HT1-11	LG5	21023742	5132	23
HT1-12	LG5	21022215	752	196
HT1-12	LG5	21022236	720	231
HT1-12	LG5	21022256	721	222
HT1-12	LG5	21022272	521	399
HT1-12	LG5	21022279	644	308
HT1-12	LG5	21022305	0	150
HT1-12	LG5	21022652	1363	6
HT1-12	LG5	21023742	3051	12
HT1-13	LG5	21022215	98	42
HT1-13	LG5	21022236	89	46
HT1-13	LG5	21022256	85	49
HT1-13	LG5	21022272	54	79
HT1-13	LG5	21022279	80	52
HT1-13	LG5	21022652	466	2
HT1-13	LG5	21023742	20	0
HT1-14	LG5	21022215	801	145
HT1-14	LG5	21022236	765	176
HT1-14	LG5	21022256	803	145
HT1-14	LG5	21022272	550	368
HT1-14	LG5	21022279	740	208
HT1-14	LG5	21022305	1	154
HT1-14	LG5	21022652	70	0
HT1-14	LG5	21023742	4110	19
HT1-15	LG5	21022215	307	40
HT1-15	LG5	21022236	268	70
HT1-15	LG5	21022256	251	87
HT1-15	LG5	21022272	184	142
HT1-15	LG5	21022279	224	114
HT1-15	LG5	21022305	1	47
HT1-15	LG5	21022652	1317	3
HT1-15	LG5	21023742	37	0
HT1-16	LG5	21022215	255	66
HT1-16	LG5	21022236	238	87
HT1-16	LG5	21022256	240	84
HT1-16	LG5	21022272	143	160
HT1-16	LG5	21022279	176	146
HT1-16	LG5	21022305	0	48
HT1-16	LG5	21022652	28	0
HT1-16	LG5	21023742	1127	1
HT1-17	LG5	21022215	654	116
HT1-17	LG5	21022236	587	186
HT1-17	LG5	21022256	597	167
HT1-17	LG5	21022272	413	330
HT1-17	LG5	21022279	432	334
HT1-17	LG5	21022305	0	124
HT1-17	LG5	21022652	1894	4
HT1-17	LG5	21023742	24	1
HT1-18	LG5	21022215	294	66
HT1-18	LG5	21022236	267	104
HT1-18	LG5	21022256	262	110
HT1-18	LG5	21022272	201	157
HT1-18	LG5	21022279	237	139
HT1-18	LG5	21022305	0	42
HT1-18	LG5	21022652	52	0
HT1-18	LG5	21023742	1215	2
HT1-19	LG5	21022215	1361	378
HT1-19	LG5	21022236	1266	466
HT1-19	LG5	21022256	1199	536
HT1-19	LG5	21022272	872	819
HT1-19	LG5	21022279	975	772
HT1-19	LG5	21022305	1	264
HT1-19	LG5	21022652	2052	4
HT1-19	LG5	21023736	0	24
HT1-19	LG5	21023742	10324	44
HT1-1	LG5	21022215	1870	313
HT1-1	LG5	21022236	1735	471
HT1-1	LG5	21022256	1800	441
HT1-1	LG5	21022272	1188	957
HT1-1	LG5	21022279	1505	730
HT1-1	LG5	21022305	1	367
HT1-1	LG5	21022652	3122	15
HT1-1	LG5	21023700	0	117
HT1-1	LG5	21023742	3546	8
HT1-20	LG5	21022215	44	9
HT1-20	LG5	21022236	43	9
HT1-20	LG5	21022256	40	13
HT1-20	LG5	21022272	31	23
HT1-20	LG5	21022279	37	17
HT1-20	LG5	21022652	114	0
HT1-20	LG5	21023742	31	0
HT1-21	LG5	21022164	49	1
HT1-21	LG5	21022215	2184	377
HT1-21	LG5	21022236	1906	617
HT1-21	LG5	21022256	1917	610
HT1-21	LG5	21022272	1391	1066
HT1-21	LG5	21022279	1595	953
HT1-21	LG5	21022305	0	424
HT1-21	LG5	21022652	316	1
HT1-21	LG5	21023736	0	29
HT1-21	LG5	21023742	12113	29
HT1-22	LG5	21022164	31	0
HT1-22	LG5	21022215	643	118
HT1-22	LG5	21022236	554	177
HT1-22	LG5	21022256	561	177
HT1-22	LG5	21022272	380	323
HT1-22	LG5	21022279	435	289
HT1-22	LG5	21022305	0	103
HT1-22	LG5	21022652	1599	4
HT1-22	LG5	21023742	74	0
HT1-23	LG5	21022215	399	58
HT1-23	LG5	21022236	363	93
HT1-23	LG5	21022256	399	55
HT1-23	LG5	21022272	268	166
HT1-23	LG5	21022279	344	103
HT1-23	LG5	21022305	1	82
HT1-23	LG5	21022652	33	0
HT1-23	LG5	21023742	1786	8
HT1-24	LG5	21022164	91	0
HT1-24	LG5	21022215	809	161
HT1-24	LG5	21022236	686	233
HT1-24	LG5	21022256	714	183
HT1-24	LG5	21022272	502	378
HT1-24	LG5	21022279	653	262
HT1-24	LG5	21022305	0	139
HT1-24	LG5	21022652	1076	4
HT1-24	LG5	21023742	2337	12
HT1-25	LG5	21022215	1864	386
HT1-25	LG5	21022236	1688	573
HT1-25	LG5	21022256	1697	555
HT1-25	LG5	21022272	1180	1012
HT1-25	LG5	21022279	1322	968
HT1-25	LG5	21022305	1	346
HT1-25	LG5	21022652	5084	19
HT1-25	LG5	21023700	0	175
HT1-25	LG5	21023736	0	21
HT1-25	LG5	21023742	5360	29
HT1-26	LG5	21022215	2513	596
HT1-26	LG5	21022236	2294	845
HT1-26	LG5	21022256	2222	912
HT1-26	LG5	21022272	1531	1537
HT1-26	LG5	21022279	1824	1346
HT1-26	LG5	21022305	2	503
HT1-26	LG5	21022652	2377	10
HT1-26	LG5	21023736	0	30
HT1-26	LG5	21023742	12927	38
HT1-27	LG5	21022164	38	1
HT1-27	LG5	21022215	313	31
HT1-27	LG5	21022236	255	61
HT1-27	LG5	21022256	230	80
HT1-27	LG5	21022272	205	100
HT1-27	LG5	21022279	233	84
HT1-27	LG5	21022305	0	61
HT1-27	LG5	21022652	58	1
HT1-27	LG5	21023742	1750	8
HT1-28	LG5	1548107	29	1
HT1-28	LG5	3438718	25	1
HT1-28	LG5	3438725	0	26
HT1-28	LG5	21022215	48	11
HT1-28	LG5	21022236	40	13
HT1-28	LG5	21022256	43	16
HT1-28	LG5	21022272	40	19
HT1-28	LG5	21022279	35	27
HT1-28	LG5	21023742	215	0
HT1-29	LG5	21022215	407	98
HT1-29	LG5	21022236	387	123
HT1-29	LG5	21022256	391	116
HT1-29	LG5	21022272	276	211
HT1-29	LG5	21022279	301	212
HT1-29	LG5	21022305	0	65
HT1-29	LG5	21022652	440	4
HT1-29	LG5	21023742	2504	8
HT1-2	LG5	21022215	129	23
HT1-2	LG5	21022236	122	24
HT1-2	LG5	21022256	120	24
HT1-2	LG5	21022272	92	43
HT1-2	LG5	21022279	120	24
HT1-2	LG5	21022305	0	31
HT1-2	LG5	21022652	35	0
HT1-2	LG5	21023742	771	5
HT1-30	LG5	21022215	4795	684
HT1-30	LG5	21022236	4491	1063
HT1-30	LG5	21022256	4660	894
HT1-30	LG5	21022272	3162	2157
HT1-30	LG5	21022279	4240	1333
HT1-30	LG5	21022305	1	852
HT1-30	LG5	21022646	0	21
HT1-30	LG5	21022652	8683	31
HT1-30	LG5	21023700	0	167
HT1-30	LG5	21023736	0	29
HT1-30	LG5	21023742	10399	53
HT1-3	LG5	21022215	538	109
HT1-3	LG5	21022236	510	138
HT1-3	LG5	21022256	518	134
HT1-3	LG5	21022272	376	255
HT1-3	LG5	21022279	479	180
HT1-3	LG5	21022305	0	111
HT1-3	LG5	21022652	368	2
HT1-3	LG5	21023742	2510	8
HT1-4	LG5	21022215	19	24
HT1-4	LG5	21022236	31	5
HT1-4	LG5	21022256	36	3
HT1-4	LG5	21022272	27	12
HT1-4	LG5	21022279	31	7
HT1-4	LG5	21022652	98	0
HT1-5	LG5	21022215	375	66
HT1-5	LG5	21022236	341	89
HT1-5	LG5	21022256	366	62
HT1-5	LG5	21022272	264	141
HT1-5	LG5	21022279	327	105
HT1-5	LG5	21022305	0	76
HT1-5	LG5	21022652	668	2
HT1-5	LG5	21023742	682	0
HT1-6	LG5	21022215	61	7
HT1-6	LG5	21022236	51	13
HT1-6	LG5	21022256	54	10
HT1-6	LG5	21022272	39	22
HT1-6	LG5	21022279	3	62
HT1-6	LG5	21022652	252	1
HT1-7	LG5	21022164	53	0
HT1-7	LG5	21022215	548	123
HT1-7	LG5	21022236	418	213
HT1-7	LG5	21022256	396	223
HT1-7	LG5	21022272	307	306
HT1-7	LG5	21022279	435	191
HT1-7	LG5	21022305	0	89
HT1-7	LG5	21022652	874	2
HT1-7	LG5	21023742	2302	5
HT1-9	LG5	21023742	30	0
HT2-10	LG5	17079216	2	26
HT2-10	LG5	21022112	22	0
HT2-10	LG5	21022151	0	421
HT2-10	LG5	21022164	33957	99
HT2-10	LG5	21022175	0	20
HT2-10	LG5	21022215	37738	27126
HT2-10	LG5	21022236	37305	26602
HT2-10	LG5	21022256	37677	26152
HT2-10	LG5	21022272	36460	27129
HT2-10	LG5	21022279	37354	26636
HT2-10	LG5	21022305	12	49
HT2-10	LG5	21022652	97	0
HT2-10	LG5	21023742	812	0
HT2-11	LG5	10977417	0	22
HT2-11	LG5	10977428	0	22
HT2-11	LG5	13084622	0	30
HT2-11	LG5	17079216	6	34
HT2-11	LG5	21022112	24	2
HT2-11	LG5	21022151	0	572
HT2-11	LG5	21022152	0	20
HT2-11	LG5	21022164	48192	124
HT2-11	LG5	21022175	0	41
HT2-11	LG5	21022215	56296	36303
HT2-11	LG5	21022236	51582	40410
HT2-11	LG5	21022256	50514	41343
HT2-11	LG5	21022272	48993	42692
HT2-11	LG5	21022279	50130	42033
HT2-11	LG5	21022305	22	68
HT2-11	LG5	21022652	225	0
HT2-11	LG5	21023742	1806	5
HT2-11	LG5	23893415	0	28
HT2-12	LG5	21022151	0	154
HT2-12	LG5	21022164	14373	59
HT2-12	LG5	21022215	19429	6675
HT2-12	LG5	21022236	17973	6812
HT2-12	LG5	21022256	18076	6723
HT2-12	LG5	21022272	17530	7163
HT2-12	LG5	21022279	17910	6929
HT2-12	LG5	21022305	2	75
HT2-12	LG5	21022652	1195	1
HT2-12	LG5	21023742	441	2
HT2-13	LG5	21022151	0	188
HT2-13	LG5	21022164	14230	45
HT2-13	LG5	21022215	15436	11988
HT2-13	LG5	21022236	16737	10467
HT2-13	LG5	21022256	15426	11748
HT2-13	LG5	21022272	15212	11502
HT2-13	LG5	21022279	15227	12056
HT2-13	LG5	21022305	8	15
HT2-13	LG5	21022652	54	0
HT2-13	LG5	21023742	444	0
HT2-14	LG5	21022151	0	85
HT2-14	LG5	21022164	6803	15
HT2-14	LG5	21022215	7124	5998
HT2-14	LG5	21022236	7938	5099
HT2-14	LG5	21022256	7024	6138
HT2-14	LG5	21022272	6784	6356
HT2-14	LG5	21022279	6851	6343
HT2-14	LG5	21022652	36	0
HT2-14	LG5	21023742	219	1
HT2-15	LG5	17079216	2	21
HT2-15	LG5	21022151	0	408
HT2-15	LG5	21022164	34772	90
HT2-15	LG5	21022175	0	36
HT2-15	LG5	21022215	32435	33245
HT2-15	LG5	21022236	36489	29058
HT2-15	LG5	21022256	32665	33140
HT2-15	LG5	21022272	31244	34539
HT2-15	LG5	21022279	31773	34164
HT2-15	LG5	21022284	0	266
HT2-15	LG5	21022305	16	19
HT2-15	LG5	21022652	149	0
HT2-15	LG5	21023742	407	1
HT2-16	LG5	21022151	0	125
HT2-16	LG5	21022164	11849	39
HT2-16	LG5	21022215	12789	9390
HT2-16	LG5	21022236	12115	9263
HT2-16	LG5	21022256	10515	10826
HT2-16	LG5	21022272	10816	10491
HT2-16	LG5	21022279	11027	10364
HT2-16	LG5	21022652	52	0
HT2-16	LG5	21023742	453	2
HT2-17	LG5	21022151	0	181
HT2-17	LG5	21022164	16644	56
HT2-17	LG5	21022215	17674	14974
HT2-17	LG5	21022236	19004	13795
HT2-17	LG5	21022256	17828	14918
HT2-17	LG5	21022272	14621	18073
HT2-17	LG5	21022279	16411	16440
HT2-17	LG5	21022652	42	0
HT2-17	LG5	21023742	295	1
HT2-18	LG5	17079216	1	22
HT2-18	LG5	21022151	0	203
HT2-18	LG5	21022164	19739	59
HT2-18	LG5	21022215	13051	25321
HT2-18	LG5	21022236	15064	23426
HT2-18	LG5	21022256	12546	25835
HT2-18	LG5	21022272	11978	26416
HT2-18	LG5	21022279	12280	26289
HT2-18	LG5	21022305	6	61
HT2-18	LG5	21022652	423	5
HT2-18	LG5	21023742	2112	6
HT2-19	LG5	10977417	0	25
HT2-19	LG5	10977428	0	25
HT2-19	LG5	17079216	2	18
HT2-19	LG5	21022151	0	254
HT2-19	LG5	21022164	20208	42
HT2-19	LG5	21022215	22299	16929
HT2-19	LG5	21022236	24524	14587
HT2-19	LG5	21022256	22499	16730
HT2-19	LG5	21022272	21943	17251
HT2-19	LG5	21022279	22120	17218
HT2-19	LG5	21022305	7	20
HT2-19	LG5	21022652	99	0
HT2-19	LG5	21023742	689	2
HT2-1	LG5	21022151	0	43
HT2-1	LG5	21022164	6041	11
HT2-1	LG5	21022215	6058	267
HT2-1	LG5	21022236	274	215
HT2-1	LG5	21022256	270	207
HT2-1	LG5	21022272	216	262
HT2-1	LG5	21022279	247	235
HT2-1	LG5	21022652	42	0
HT2-1	LG5	21023742	426	0
HT2-1	LG5	23893415	0	53
HT2-20	LG5	17079216	1	27
HT2-20	LG5	21022151	0	259
HT2-20	LG5	21022164	21075	82
HT2-20	LG5	21022215	22504	18215
HT2-20	LG5	21022236	25607	15289
HT2-20	LG5	21022256	23662	17220
HT2-20	LG5	21022272	22813	17970
HT2-20	LG5	21022279	23310	17673
HT2-20	LG5	21022652	134	1
HT2-20	LG5	21023742	543	4
HT2-21	LG5	17079216	1	27
HT2-21	LG5	21022151	0	319
HT2-21	LG5	21022164	25640	48
HT2-21	LG5	21022215	26890	21010
HT2-21	LG5	21022236	28182	18684
HT2-21	LG5	21022256	25681	21133
HT2-21	LG5	21022272	24843	21905
HT2-21	LG5	21022279	23716	23277
HT2-21	LG5	21022305	8	39
HT2-21	LG5	21022652	366	0
HT2-21	LG5	21023742	754	1
HT2-22	LG5	1548107	35	0
HT2-22	LG5	3438718	41	0
HT2-22	LG5	3438725	0	41
HT2-22	LG5	6172200	28	0
HT2-22	LG5	6172203	0	28
HT2-22	LG5	10977417	0	32
HT2-22	LG5	10977428	0	32
HT2-22	LG5	13084622	0	35
HT2-22	LG5	17079216	1	25
HT2-22	LG5	21022112	32	3
HT2-22	LG5	21022151	0	509
HT2-22	LG5	21022152	0	22
HT2-22	LG5	21022164	51457	229
HT2-22	LG5	21022175	0	24
HT2-22	LG5	21022215	58482	41397
HT2-22	LG5	21022236	58172	42160
HT2-22	LG5	21022256	58507	41649
HT2-22	LG5	21022272	56847	43049
HT2-22	LG5	21022279	58117	42383
HT2-22	LG5	21022283	1	20
HT2-22	LG5	21022305	27	54
HT2-22	LG5	21022652	171	0
HT2-22	LG5	21023742	1372	3
HT2-22	LG5	23893415	0	23
HT2-22	LG5	25690842	0	30
HT2-22	LG5	25690848	0	30
HT2-23	LG5	6172200	28	0
HT2-23	LG5	6172203	0	28
HT2-23	LG5	10977417	0	41
HT2-23	LG5	10977428	0	41
HT2-23	LG5	13084622	0	35
HT2-23	LG5	17079216	1	57
HT2-23	LG5	17292931	22	1
HT2-23	LG5	21022112	38	6
HT2-23	LG5	21022151	0	618
HT2-23	LG5	21022152	0	32
HT2-23	LG5	21022164	54493	174
HT2-23	LG5	21022175	0	43
HT2-23	LG5	21022215	48850	55779
HT2-23	LG5	21022236	51610	50345
HT2-23	LG5	21022256	47945	50509
HT2-23	LG5	21022272	46877	54741
HT2-23	LG5	21022279	50449	51661
HT2-23	LG5	21022305	21	31
HT2-23	LG5	21022652	195	0
HT2-23	LG5	21023742	1827	6
HT2-23	LG5	23893415	0	71
HT2-24	LG5	695342	0	44
HT2-24	LG5	1548107	41	4
HT2-24	LG5	13925514	0	95
HT2-24	LG5	17250797	138	0
HT2-24	LG5	17250803	0	138
HT2-24	LG5	17250809	0	138
HT2-24	LG5	17292931	20	0
HT2-24	LG5	21022151	0	471
HT2-24	LG5	21022164	51101	89
HT2-24	LG5	21022175	0	46
HT2-24	LG5	21022215	48037	12575
HT2-24	LG5	21022236	6479	12377
HT2-24	LG5	21022256	6466	12349
HT2-24	LG5	21022272	5976	12823
HT2-24	LG5	21022279	6281	12608
HT2-24	LG5	21022305	1	140
HT2-24	LG5	21022652	708	3
HT2-24	LG5	21023742	2723	14
HT2-24	LG5	23893415	0	412
HT2-24	LG5	25655902	0	28
HT2-24	LG5	26725733	45	3
HT2-25	LG5	1548107	41	2
HT2-25	LG5	3438718	22	0
HT2-25	LG5	3438725	0	22
HT2-25	LG5	21022151	0	278
HT2-25	LG5	21022164	22792	52
HT2-25	LG5	21022215	24874	16868
HT2-25	LG5	21022236	22371	17074
HT2-25	LG5	21022256	22585	16803
HT2-25	LG5	21022272	38208	980
HT2-25	LG5	21022279	22367	17164
HT2-25	LG5	21022305	6	44
HT2-25	LG5	21022652	357	1
HT2-25	LG5	21023742	744	3
HT2-25	LG5	23893415	0	28
HT2-26	LG5	21022151	0	121
HT2-26	LG5	21022164	11467	27
HT2-26	LG5	21022215	18505	3455
HT2-26	LG5	21022236	18555	3542
HT2-26	LG5	21022256	22024	122
HT2-26	LG5	21022272	21380	558
HT2-26	LG5	21022279	18642	3485
HT2-26	LG5	21022652	64	1
HT2-26	LG5	21023742	280	0
HT2-27	LG5	21022151	0	305
HT2-27	LG5	21022164	22498	60
HT2-27	LG5	21022215	23532	18406
HT2-27	LG5	21022236	23714	17964
HT2-27	LG5	21022256	22872	18739
HT2-27	LG5	21022272	22213	19343
HT2-27	LG5	21022279	22597	19141
HT2-27	LG5	21022305	7	40
HT2-27	LG5	21022652	599	5
HT2-27	LG5	21023742	1022	6
HT2-28	LG5	21022151	0	103
HT2-28	LG5	21022164	8537	31
HT2-28	LG5	21022215	8758	7332
HT2-28	LG5	21022236	10201	5653
HT2-28	LG5	21022256	8707	7360
HT2-28	LG5	21022272	8289	7708
HT2-28	LG5	21022279	8521	7604
HT2-28	LG5	21022652	42	0
HT2-28	LG5	21023742	366	0
HT2-29	LG5	17079216	3	18
HT2-29	LG5	21022151	0	299
HT2-29	LG5	21022164	23837	64
HT2-29	LG5	21022175	0	36
HT2-29	LG5	21022215	24388	21083
HT2-29	LG5	21022236	26663	18981
HT2-29	LG5	21022256	24159	21421
HT2-29	LG5	21022272	23636	21839
HT2-29	LG5	21022279	24131	21572
HT2-29	LG5	21022305	9	18
HT2-29	LG5	21022652	90	0
HT2-29	LG5	21023742	393	1
HT2-2	LG5	17079216	3	17
HT2-2	LG5	21022151	0	175
HT2-2	LG5	21022164	13078	35
HT2-2	LG5	21022215	11564	13625
HT2-2	LG5	21022236	13506	11764
HT2-2	LG5	21022256	11728	13557
HT2-2	LG5	21022272	11312	13915
HT2-2	LG5	21022279	11801	13512
HT2-2	LG5	21022652	83	0
HT2-2	LG5	21023742	311	0
HT2-30	LG5	21022151	0	108
HT2-30	LG5	21022164	11749	30
HT2-30	LG5	21022215	1232	21444
HT2-30	LG5	21022236	782	21877
HT2-30	LG5	21022256	572	22010
HT2-30	LG5	21022272	296	22355
HT2-30	LG5	21022279	287	22428
HT2-30	LG5	21022305	4	26
HT2-30	LG5	21022652	225	0
HT2-30	LG5	21023742	374	0
HT2-3	LG5	17079216	3	20
HT2-3	LG5	21022151	0	369
HT2-3	LG5	21022164	27474	65
HT2-3	LG5	21022215	30624	21009
HT2-3	LG5	21022236	35244	16971
HT2-3	LG5	21022256	30585	21530
HT2-3	LG5	21022272	30364	21668
HT2-3	LG5	21022279	31044	21257
HT2-3	LG5	21022305	10	24
HT2-3	LG5	21022652	94	0
HT2-3	LG5	21023742	515	0
HT2-4	LG5	21022151	0	175
HT2-4	LG5	21022164	13646	33
HT2-4	LG5	21022175	1	31
HT2-4	LG5	21022215	13049	13333
HT2-4	LG5	21022236	14691	11790
HT2-4	LG5	21022256	12861	13607
HT2-4	LG5	21022272	12377	14033
HT2-4	LG5	21022279	12668	13883
HT2-4	LG5	21022305	6	15
HT2-4	LG5	21022652	72	1
HT2-4	LG5	21023742	345	1
HT2-4	LG5	23893415	0	20
HT2-5	LG5	17079216	1	20
HT2-5	LG5	21022151	0	422
HT2-5	LG5	21022164	34010	99
HT2-5	LG5	21022175	0	77
HT2-5	LG5	21022182	0	61
HT2-5	LG5	21022215	32103	33515
HT2-5	LG5	21022236	37120	28651
HT2-5	LG5	21022237	8	15
HT2-5	LG5	21022256	32384	33140
HT2-5	LG5	21022272	31804	33814
HT2-5	LG5	21022279	32129	33786
HT2-5	LG5	21022283	0	118
HT2-5	LG5	21022305	7	27
HT2-5	LG5	21022652	186	0
HT2-5	LG5	21023742	515	2
HT2-6	LG5	10977417	0	22
HT2-6	LG5	10977428	0	22
HT2-6	LG5	17079216	2	54
HT2-6	LG5	21022112	18	3
HT2-6	LG5	21022151	0	494
HT2-6	LG5	21022164	40009	127
HT2-6	LG5	21022215	41428	35668
HT2-6	LG5	21022236	44171	32773
HT2-6	LG5	21022237	1	493
HT2-6	LG5	21022256	41874	35472
HT2-6	LG5	21022272	41168	35975
HT2-6	LG5	21022279	41914	35661
HT2-6	LG5	21022305	20	20
HT2-6	LG5	21022652	138	0
HT2-6	LG5	21023742	863	2
HT2-7	LG5	10977417	0	24
HT2-7	LG5	10977428	0	24
HT2-7	LG5	17079216	3	38
HT2-7	LG5	21022112	23	0
HT2-7	LG5	21022151	0	446
HT2-7	LG5	21022164	34742	83
HT2-7	LG5	21022175	0	39
HT2-7	LG5	21022215	32389	34585
HT2-7	LG5	21022236	35837	30954
HT2-7	LG5	21022256	32585	34408
HT2-7	LG5	21022272	31631	35377
HT2-7	LG5	21022279	33131	34160
HT2-7	LG5	21022305	16	32
HT2-7	LG5	21022652	203	0
HT2-7	LG5	21023742	849	1
HT2-8	LG5	10977417	0	25
HT2-8	LG5	10977428	0	25
HT2-8	LG5	17079216	2	18
HT2-8	LG5	21022151	0	211
HT2-8	LG5	21022164	18061	58
HT2-8	LG5	21022175	1	193
HT2-8	LG5	21022215	16002	19337
HT2-8	LG5	21022236	17458	17816
HT2-8	LG5	21022256	16174	18622
HT2-8	LG5	21022272	14943	20254
HT2-8	LG5	21022279	15309	19999
HT2-8	LG5	21022305	8	20
HT2-8	LG5	21022652	186	0
HT2-8	LG5	21023742	470	1
HT2-9	LG5	21022151	0	64
HT2-9	LG5	21022164	5925	15
HT2-9	LG5	21022215	2670	8088
HT2-9	LG5	21022236	1708	8138
HT2-9	LG5	21022256	1739	8068
HT2-9	LG5	21022272	1618	8195
HT2-9	LG5	21022279	1697	8163
HT2-9	LG5	21022652	127	0
HT2-9	LG5	21023742	364	1
HT2-9	LG5	23893415	0	441
HT3-10	LG5	21022164	26	0
HT3-10	LG5	21022215	2446	407
HT3-10	LG5	21022236	2170	683
HT3-10	LG5	21022256	2250	584
HT3-10	LG5	21022272	1402	1340
HT3-10	LG5	21022279	1706	1154
HT3-10	LG5	21022305	0	419
HT3-10	LG5	21022652	221	0
HT3-10	LG5	21023736	0	40
HT3-10	LG5	21023742	10648	37
HT3-11	LG5	21022215	183	30
HT3-11	LG5	21022236	179	37
HT3-11	LG5	21022256	169	41
HT3-11	LG5	21022272	115	85
HT3-11	LG5	21022279	137	75
HT3-11	LG5	21022305	0	30
HT3-11	LG5	21022652	24	0
HT3-11	LG5	21023742	1491	5
HT3-12	LG5	21022215	295	72
HT3-12	LG5	21022236	270	92
HT3-12	LG5	21022256	272	85
HT3-12	LG5	21022272	188	158
HT3-12	LG5	21022279	236	125
HT3-12	LG5	21022305	0	69
HT3-12	LG5	21022652	21	0
HT3-12	LG5	21023742	1673	9
HT3-13	LG5	21022215	297	49
HT3-13	LG5	21022236	273	64
HT3-13	LG5	21022256	276	59
HT3-13	LG5	21022272	178	135
HT3-13	LG5	21022279	197	133
HT3-13	LG5	21022305	0	51
HT3-13	LG5	21022652	30	0
HT3-13	LG5	21023742	2835	11
HT3-14	LG5	21022215	370	85
HT3-14	LG5	21022236	343	105
HT3-14	LG5	21022256	335	113
HT3-14	LG5	21022272	227	200
HT3-14	LG5	21022279	259	196
HT3-14	LG5	21022305	1	83
HT3-14	LG5	21022652	22	1
HT3-14	LG5	21023742	2207	6
HT3-15	LG5	21022164	25	0
HT3-15	LG5	21022215	71	11
HT3-15	LG5	21022236	43	13
HT3-15	LG5	21022256	41	12
HT3-15	LG5	21022272	33	20
HT3-15	LG5	21022279	32	24
HT3-15	LG5	21022652	149	1
HT3-15	LG5	21023742	20	0
HT3-16	LG5	21022164	272	1
HT3-16	LG5	21022215	3655	556
HT3-16	LG5	21022236	3322	733
HT3-16	LG5	21022256	3273	782
HT3-16	LG5	21022272	2378	1523
HT3-16	LG5	21022279	2711	1379
HT3-16	LG5	21022305	1	621
HT3-16	LG5	21022307	0	26
HT3-16	LG5	21022652	264	0
HT3-16	LG5	21023620	18	13
HT3-16	LG5	21023736	0	66
HT3-16	LG5	21023742	24084	93
HT3-17	LG5	21022164	167	1
HT3-17	LG5	21022215	544	72
HT3-17	LG5	21022236	355	104
HT3-17	LG5	21022256	349	109
HT3-17	LG5	21022272	260	180
HT3-17	LG5	21022279	306	158
HT3-17	LG5	21022305	0	90
HT3-17	LG5	21023742	2615	13
HT3-18	LG5	21022164	134	0
HT3-18	LG5	21022215	560	60
HT3-18	LG5	21022236	412	86
HT3-18	LG5	21022256	397	112
HT3-18	LG5	21022272	306	187
HT3-18	LG5	21022279	347	159
HT3-18	LG5	21022305	0	74
HT3-18	LG5	21022652	22	0
HT3-18	LG5	21023742	2500	10
HT3-19	LG5	21022164	73	0
HT3-19	LG5	21022215	1209	194
HT3-19	LG5	21022236	1089	264
HT3-19	LG5	21022256	1092	254
HT3-19	LG5	21022272	759	549
HT3-19	LG5	21022279	846	515
HT3-19	LG5	21022305	0	200
HT3-19	LG5	21022652	50	0
HT3-19	LG5	21023736	0	22
HT3-19	LG5	21023742	8205	36
HT3-1	LG5	21022164	73	0
HT3-1	LG5	21022215	370	111
HT3-1	LG5	21022236	223	195
HT3-1	LG5	21022256	204	199
HT3-1	LG5	21022272	198	204
HT3-1	LG5	21022279	263	154
HT3-1	LG5	21022305	0	66
HT3-1	LG5	21022652	35	0
HT3-1	LG5	21023742	2706	13
HT3-20	LG5	21022215	2673	383
HT3-20	LG5	21022236	2490	586
HT3-20	LG5	21022256	2585	479
HT3-20	LG5	21022272	1759	1220
HT3-20	LG5	21022279	2224	877
HT3-20	LG5	21022305	1	519
HT3-20	LG5	21022652	287	1
HT3-20	LG5	21023736	0	44
HT3-20	LG5	21023742	15255	43
HT3-20	LG5	21838659	0	72
HT3-20	LG5	21838748	66	6
HT3-20	LG5	21838750	61	11
HT3-20	LG5	21838758	56	15
HT3-20	LG5	21838768	70	0
HT3-20	LG5	28277779	310	5
HT3-20	LG5	28277830	593	2
HT3-20	LG5	28277835	599	2
HT3-21	LG5	21022164	29	0
HT3-21	LG5	21022215	903	163
HT3-21	LG5	21022236	840	207
HT3-21	LG5	21022256	823	226
HT3-21	LG5	21022272	588	411
HT3-21	LG5	21022279	671	382
HT3-21	LG5	21022305	0	173
HT3-21	LG5	21022652	142	0
HT3-21	LG5	21023736	0	21
HT3-21	LG5	21023742	5989	13
HT3-22	LG5	21022164	88	1
HT3-22	LG5	21022215	1289	185
HT3-22	LG5	21022236	1150	265
HT3-22	LG5	21022256	1247	171
HT3-22	LG5	21022272	830	513
HT3-22	LG5	21022279	1142	285
HT3-22	LG5	21022305	0	231
HT3-22	LG5	21022652	107	0
HT3-22	LG5	21023736	0	28
HT3-22	LG5	21023742	7911	22
HT3-24	LG5	21022164	267	0
HT3-24	LG5	21022215	752	117
HT3-24	LG5	21022236	464	173
HT3-24	LG5	21022256	435	182
HT3-24	LG5	21022272	324	273
HT3-24	LG5	21022279	403	227
HT3-24	LG5	21022305	0	112
HT3-24	LG5	21022652	23	0
HT3-24	LG5	21023742	2896	13
HT3-25	LG5	21022164	566	2
HT3-25	LG5	21022215	978	113
HT3-25	LG5	21022236	433	120
HT3-25	LG5	21022256	434	98
HT3-25	LG5	21022272	276	235
HT3-25	LG5	21022279	368	157
HT3-25	LG5	21022305	1	97
HT3-25	LG5	21022652	28	1
HT3-25	LG5	21023742	3588	24
HT3-26	LG5	21022164	94	0
HT3-26	LG5	21022215	192	21
HT3-26	LG5	21022236	101	14
HT3-26	LG5	21022256	98	18
HT3-26	LG5	21022272	72	36
HT3-26	LG5	21022279	102	16
HT3-26	LG5	21022652	147	1
HT3-26	LG5	21023742	307	0
HT3-27	LG5	21022164	333	0
HT3-27	LG5	21022215	644	122
HT3-27	LG5	21022236	310	133
HT3-27	LG5	21022256	298	138
HT3-27	LG5	21022272	240	181
HT3-27	LG5	21022279	275	168
HT3-27	LG5	21022305	1	60
HT3-27	LG5	21022652	24	0
HT3-27	LG5	21023742	2210	8
HT3-28	LG5	21022164	434	0
HT3-28	LG5	21022215	1212	180
HT3-28	LG5	21022236	801	190
HT3-28	LG5	21022256	778	204
HT3-28	LG5	21022272	563	389
HT3-28	LG5	21022279	716	269
HT3-28	LG5	21022305	0	155
HT3-28	LG5	21022652	50	0
HT3-28	LG5	21023742	4962	27
HT3-29	LG5	21022164	580	0
HT3-29	LG5	21022215	1198	172
HT3-29	LG5	21022236	665	151
HT3-29	LG5	21022256	664	153
HT3-29	LG5	21022272	481	300
HT3-29	LG5	21022279	600	227
HT3-29	LG5	21022305	0	135
HT3-29	LG5	21022652	34	0
HT3-29	LG5	21023742	3771	21
HT3-2	LG5	21022164	37	0
HT3-2	LG5	21022215	3391	474
HT3-2	LG5	21022236	3155	712
HT3-2	LG5	21022256	3233	622
HT3-2	LG5	21022272	2238	1469
HT3-2	LG5	21022279	2986	885
HT3-2	LG5	21022305	1	637
HT3-2	LG5	21022652	240	0
HT3-2	LG5	21023620	17	20
HT3-2	LG5	21023736	0	36
HT3-2	LG5	21023742	17804	55
HT3-30	LG5	21022164	659	1
HT3-30	LG5	21022215	1634	235
HT3-30	LG5	21022236	1038	218
HT3-30	LG5	21022256	1065	186
HT3-30	LG5	21022272	763	432
HT3-30	LG5	21022279	966	286
HT3-30	LG5	21022305	0	201
HT3-30	LG5	21022652	50	1
HT3-30	LG5	21023742	6109	36
HT3-3	LG5	21022164	41	2
HT3-3	LG5	21022215	942	232
HT3-3	LG5	21022236	912	232
HT3-3	LG5	21022256	930	210
HT3-3	LG5	21022272	673	414
HT3-3	LG5	21022279	902	250
HT3-3	LG5	21022305	0	177
HT3-3	LG5	21022652	77	0
HT3-3	LG5	21023742	6271	25
HT3-4	LG5	21022164	82	0
HT3-4	LG5	21022215	3533	634
HT3-4	LG5	21022236	3170	895
HT3-4	LG5	21022256	3171	903
HT3-4	LG5	21022272	2217	1724
HT3-4	LG5	21022279	2408	1654
HT3-4	LG5	21022305	0	617
HT3-4	LG5	21022652	276	1
HT3-4	LG5	21023736	0	39
HT3-4	LG5	21023742	18805	67
HT3-5	LG5	21022164	39	0
HT3-5	LG5	21022215	574	101
HT3-5	LG5	21022236	504	138
HT3-5	LG5	21022256	518	129
HT3-5	LG5	21022272	349	276
HT3-5	LG5	21022279	409	234
HT3-5	LG5	21022305	0	106
HT3-5	LG5	21022652	52	0
HT3-5	LG5	21023742	3093	7
HT3-6	LG5	21022164	221	0
HT3-6	LG5	21022215	2057	414
HT3-6	LG5	21022236	1693	627
HT3-6	LG5	21022256	1623	667
HT3-6	LG5	21022272	1162	1084
HT3-6	LG5	21022279	1263	1064
HT3-6	LG5	21022305	0	355
HT3-6	LG5	21022652	109	0
HT3-6	LG5	21023736	0	23
HT3-6	LG5	21023742	10371	39
HT3-7	LG5	21022164	95	0
HT3-7	LG5	21022215	2657	404
HT3-7	LG5	21022236	2356	643
HT3-7	LG5	21022256	2362	622
HT3-7	LG5	21022272	1603	1226
HT3-7	LG5	21022279	1990	1001
HT3-7	LG5	21022305	0	411
HT3-7	LG5	21022652	183	2
HT3-7	LG5	21023620	15	15
HT3-7	LG5	21023736	0	52
HT3-7	LG5	21023742	19527	76
HT3-8	LG5	21022215	714	111
HT3-8	LG5	21022236	694	137
HT3-8	LG5	21022256	649	177
HT3-8	LG5	21022272	470	324
HT3-8	LG5	21022279	499	338
HT3-8	LG5	21022305	0	139
HT3-8	LG5	21022652	110	0
HT3-8	LG5	21023742	3715	9
HT3-9	LG5	21022215	155	37
HT3-9	LG5	21022236	145	39
HT3-9	LG5	21022256	146	34
HT3-9	LG5	21022272	110	69
HT3-9	LG5	21022279	101	83
HT3-9	LG5	21022305	0	31
HT3-9	LG5	21022652	541	1
HT3-9	LG5	21023742	271	3
HT4-10	LG5	1548107	22	0
HT4-10	LG5	21022164	49	0
HT4-10	LG5	21022215	164	53
HT4-10	LG5	21022236	145	47
HT4-10	LG5	21022256	138	58
HT4-10	LG5	21022272	103	80
HT4-10	LG5	21022279	127	75
HT4-10	LG5	21022652	100	1
HT4-10	LG5	21023742	843	3
HT4-11	LG5	13925514	0	22
HT4-11	LG5	21022164	66	0
HT4-11	LG5	21022215	667	129
HT4-11	LG5	21022236	565	193
HT4-11	LG5	21022256	582	176
HT4-11	LG5	21022272	403	316
HT4-11	LG5	21022279	526	232
HT4-11	LG5	21022305	0	132
HT4-11	LG5	21022652	96	0
HT4-11	LG5	21023742	4315	19
HT4-12	LG5	21022151	0	151
HT4-12	LG5	21022164	13167	36
HT4-12	LG5	21022215	1782	24555
HT4-12	LG5	21022236	25596	644
HT4-12	LG5	21022256	1096	25044
HT4-12	LG5	21022272	653	25557
HT4-12	LG5	21022279	641	25675
HT4-12	LG5	21022305	9	134
HT4-12	LG5	21022652	73	0
HT4-12	LG5	21023742	4525	25
HT4-13	LG5	1548107	48	1
HT4-13	LG5	3438718	29	0
HT4-13	LG5	3438725	0	29
HT4-13	LG5	21022164	208	1
HT4-13	LG5	21022215	1340	336
HT4-13	LG5	21022236	1167	390
HT4-13	LG5	21022256	1231	312
HT4-13	LG5	21022272	867	615
HT4-13	LG5	21022279	1051	500
HT4-13	LG5	21022305	0	238
HT4-13	LG5	21022652	207	1
HT4-13	LG5	21023742	8208	30
HT4-14	LG5	21022151	0	47
HT4-14	LG5	21022164	3142	8
HT4-14	LG5	21022215	6208	134
HT4-14	LG5	21022236	6181	190
HT4-14	LG5	21022256	6269	104
HT4-14	LG5	21022272	6056	279
HT4-14	LG5	21022279	6215	175
HT4-14	LG5	21022305	2	41
HT4-14	LG5	21022652	536	3
HT4-14	LG5	21023742	1450	3
HT4-15	LG5	21022151	0	41
HT4-15	LG5	21022164	4815	8
HT4-15	LG5	21022215	5405	258
HT4-15	LG5	21022236	615	265
HT4-15	LG5	21022256	622	257
HT4-15	LG5	21022272	427	420
HT4-15	LG5	21022279	523	365
HT4-15	LG5	21022305	1	132
HT4-15	LG5	21022652	139	0
HT4-15	LG5	21023742	5105	20
HT4-15	LG5	23893415	0	47
HT4-16	LG5	1548107	21	0
HT4-16	LG5	21022164	82	0
HT4-16	LG5	21022215	1340	326
HT4-16	LG5	21022236	1194	425
HT4-16	LG5	21022256	1225	381
HT4-16	LG5	21022272	867	678
HT4-16	LG5	21022279	1039	576
HT4-16	LG5	21022305	0	249
HT4-16	LG5	21022652	207	2
HT4-16	LG5	21023736	0	26
HT4-16	LG5	21023742	9270	17
HT4-18	LG5	21022164	127	1
HT4-18	LG5	21022215	1754	353
HT4-18	LG5	21022236	1601	454
HT4-18	LG5	21022256	1627	425
HT4-18	LG5	21022272	1142	831
HT4-18	LG5	21022279	1326	733
HT4-18	LG5	21022305	0	326
HT4-18	LG5	21022652	259	0
HT4-18	LG5	21023736	0	22
HT4-18	LG5	21023742	9308	25
HT4-19	LG5	695342	0	44
HT4-19	LG5	1548107	87	5
HT4-19	LG5	13925514	0	98
HT4-19	LG5	17250797	128	0
HT4-19	LG5	17250803	0	128
HT4-19	LG5	17250809	0	128
HT4-19	LG5	21022151	0	309
HT4-19	LG5	21022164	39136	69
HT4-19	LG5	21022175	0	31
HT4-19	LG5	21022215	39266	1463
HT4-19	LG5	21022236	502	1134
HT4-19	LG5	21022256	573	1046
HT4-19	LG5	21022272	361	1262
HT4-19	LG5	21022279	444	1206
HT4-19	LG5	21022305	1	259
HT4-19	LG5	21022652	801	3
HT4-19	LG5	21023742	7209	25
HT4-19	LG5	23893415	0	470
HT4-19	LG5	25655902	0	20
HT4-19	LG5	26725733	41	2
HT4-1	LG5	1548107	61	2
HT4-1	LG5	5497645	0	25
HT4-1	LG5	5497648	22	3
HT4-1	LG5	5616124	0	41
HT4-1	LG5	13925514	0	106
HT4-1	LG5	16201112	137	3
HT4-1	LG5	17250797	34	1
HT4-1	LG5	17250803	0	35
HT4-1	LG5	17250809	0	35
HT4-1	LG5	21022151	0	256
HT4-1	LG5	21022164	25074	40
HT4-1	LG5	21022175	0	20
HT4-1	LG5	21022215	37052	457
HT4-1	LG5	21022236	25351	377
HT4-1	LG5	21022256	25555	232
HT4-1	LG5	21022272	25008	574
HT4-1	LG5	21022279	25479	302
HT4-1	LG5	21022305	4	21
HT4-1	LG5	21022652	130	1
HT4-1	LG5	21023742	698	2
HT4-1	LG5	23893415	0	102
HT4-1	LG5	29962663	0	30
HT4-1	LG5	29962666	27	3
HT4-1	LG5	31765369	0	26
HT4-20	LG5	21022151	0	167
HT4-20	LG5	21022164	15088	69
HT4-20	LG5	21022215	13321	13333
HT4-20	LG5	21022236	10085	13543
HT4-20	LG5	21022256	10028	13527
HT4-20	LG5	21022272	9552	13925
HT4-20	LG5	21022279	9840	13806
HT4-20	LG5	21022305	1	145
HT4-20	LG5	21022652	106	1
HT4-20	LG5	21023742	5497	17
HT4-20	LG5	23893415	0	35
HT4-21	LG5	21022151	0	201
HT4-21	LG5	21022164	17552	76
HT4-21	LG5	21022175	0	96
HT4-21	LG5	21022215	20673	8794
HT4-21	LG5	21022236	7970	18418
HT4-21	LG5	21022256	7981	18350
HT4-21	LG5	21022272	7697	18602
HT4-21	LG5	21022279	7836	18541
HT4-21	LG5	21022305	4	23
HT4-21	LG5	21022652	23	0
HT4-21	LG5	21023742	905	2
HT4-21	LG5	23893415	0	43
HT4-22	LG5	1548107	71	4
HT4-22	LG5	3438718	30	0
HT4-22	LG5	3438725	0	30
HT4-22	LG5	13925514	0	39
HT4-22	LG5	17250797	53	0
HT4-22	LG5	17250803	0	53
HT4-22	LG5	17250809	0	53
HT4-22	LG5	21022151	0	265
HT4-22	LG5	21022164	34234	69
HT4-22	LG5	21022175	0	21
HT4-22	LG5	21022215	19778	27942
HT4-22	LG5	21022236	327	28088
HT4-22	LG5	21022256	377	27854
HT4-22	LG5	21022272	238	28200
HT4-22	LG5	21022279	216	28258
HT4-22	LG5	21022305	12	31
HT4-22	LG5	21022652	135	1
HT4-22	LG5	21023742	615	1
HT4-22	LG5	23893415	0	455
HT4-22	LG5	29962663	0	21
HT4-22	LG5	29962666	20	1
HT4-23	LG5	21022164	1141	5
HT4-23	LG5	21022215	1756	89
HT4-23	LG5	21022236	1529	89
HT4-23	LG5	21022256	1545	80
HT4-23	LG5	21022272	1445	147
HT4-23	LG5	21022279	1536	89
HT4-23	LG5	21023742	208	0
HT4-24	LG5	21022164	128	1
HT4-24	LG5	21022215	132	72
HT4-24	LG5	21022236	59	75
HT4-24	LG5	21022256	56	74
HT4-24	LG5	21022272	42	89
HT4-24	LG5	21022279	46	87
HT4-24	LG5	21023742	231	1
HT4-25	LG5	1548107	18	2
HT4-25	LG5	21022151	0	147
HT4-25	LG5	21022164	14009	26
HT4-25	LG5	21022215	7109	13595
HT4-25	LG5	21022236	173	13667
HT4-25	LG5	21022256	174	13596
HT4-25	LG5	21022272	75	13739
HT4-25	LG5	21022279	103	13711
HT4-25	LG5	21023742	225	2
HT4-25	LG5	23893415	0	52
HT4-26	LG5	1548107	46	2
HT4-26	LG5	3438718	23	0
HT4-26	LG5	3438725	0	23
HT4-26	LG5	13925514	0	24
HT4-26	LG5	21022151	0	85
HT4-26	LG5	21022164	9038	14
HT4-26	LG5	21022215	10217	240
HT4-26	LG5	21022236	2625	171
HT4-26	LG5	21022256	287	2508
HT4-26	LG5	21022272	213	2586
HT4-26	LG5	21022279	235	2570
HT4-26	LG5	21022305	1	19
HT4-26	LG5	21022652	147	1
HT4-26	LG5	21023742	675	3
HT4-26	LG5	23893415	0	87
HT4-27	LG5	1548107	53	2
HT4-27	LG5	21022151	0	131
HT4-27	LG5	21022164	13428	35
HT4-27	LG5	21022215	6335	15145
HT4-27	LG5	21022236	691	15367
HT4-27	LG5	21022256	668	15281
HT4-27	LG5	21022272	434	15578
HT4-27	LG5	21022279	526	15530
HT4-27	LG5	21022305	3	119
HT4-27	LG5	21022652	1496	9
HT4-27	LG5	21023742	1102	7
HT4-27	LG5	23893415	0	61
HT4-2	LG5	21022164	87	0
HT4-2	LG5	21022215	109	62
HT4-2	LG5	21022236	91	64
HT4-2	LG5	21022256	95	59
HT4-2	LG5	21022272	72	81
HT4-2	LG5	21022279	76	80
HT4-2	LG5	21022652	42	0
HT4-2	LG5	21023742	225	0
HT4-3	LG5	1548107	48	3
HT4-3	LG5	4110575	3	25
HT4-3	LG5	13925514	0	37
HT4-3	LG5	17079216	4	92
HT4-3	LG5	17250797	59	0
HT4-3	LG5	17250803	0	59
HT4-3	LG5	17250809	0	59
HT4-3	LG5	21022151	0	186
HT4-3	LG5	21022164	21272	33
HT4-3	LG5	21022215	21250	378
HT4-3	LG5	21022236	340	155
HT4-3	LG5	21022256	341	152
HT4-3	LG5	21022272	290	187
HT4-3	LG5	21022279	296	201
HT4-3	LG5	21022305	0	46
HT4-3	LG5	21022652	180	1
HT4-3	LG5	21023742	1562	7
HT4-3	LG5	23893415	0	179
HT4-3	LG5	26725733	17	3
HT4-3	LG5	31765369	0	71
HT4-4	LG5	21022164	156	2
HT4-4	LG5	21022215	1078	238
HT4-4	LG5	21022236	956	309
HT4-4	LG5	21022256	942	313
HT4-4	LG5	21022272	666	556
HT4-4	LG5	21022279	783	490
HT4-4	LG5	21022305	1	186
HT4-4	LG5	21022652	173	1
HT4-4	LG5	21023742	7276	28
HT4-5	LG5	1548107	52	2
HT4-5	LG5	3438718	20	0
HT4-5	LG5	3438725	0	20
HT4-5	LG5	21022151	0	97
HT4-5	LG5	21022164	8643	19
HT4-5	LG5	21022215	20236	1155
HT4-5	LG5	21022236	20038	1481
HT4-5	LG5	21022256	20168	1372
HT4-5	LG5	21022272	18567	2681
HT4-5	LG5	21022279	19392	2226
HT4-5	LG5	21022305	5	910
HT4-5	LG5	21022307	0	30
HT4-5	LG5	21022652	439	2
HT4-5	LG5	21023568	2	28
HT4-5	LG5	21023595	4	19
HT4-5	LG5	21023602	11	28
HT4-5	LG5	21023620	35	13
HT4-5	LG5	21023736	0	95
HT4-5	LG5	21023742	33698	89
HT4-5	LG5	31765369	0	25
HT4-6	LG5	1548107	20	1
HT4-6	LG5	21022151	0	23
HT4-6	LG5	21022164	2634	7
HT4-6	LG5	21022215	3144	151
HT4-6	LG5	21022236	548	169
HT4-6	LG5	21022256	566	150
HT4-6	LG5	21022272	412	280
HT4-6	LG5	21022279	451	284
HT4-6	LG5	21022305	0	102
HT4-6	LG5	21022652	65	0
HT4-6	LG5	21023742	4208	13
HT4-6	LG5	23893415	0	25
HT4-7	LG5	21022151	0	31
HT4-7	LG5	21022164	2290	5
HT4-7	LG5	21022215	4841	247
HT4-7	LG5	21022236	4485	292
HT4-7	LG5	21022256	4537	227
HT4-7	LG5	21022272	4197	499
HT4-7	LG5	21022279	4419	363
HT4-7	LG5	21022305	1	152
HT4-7	LG5	21022652	82	0
HT4-7	LG5	21023736	0	20
HT4-7	LG5	21023742	5859	19
HT4-8	LG5	21022164	896	2
HT4-8	LG5	21022215	1633	166
HT4-8	LG5	21022236	709	228
HT4-8	LG5	21022256	713	207
HT4-8	LG5	21022272	487	406
HT4-8	LG5	21022279	565	380
HT4-8	LG5	21022305	0	154
HT4-8	LG5	21022652	61	1
HT4-8	LG5	21023742	5597	27
HT4-9	LG5	1548107	59	0
HT4-9	LG5	3438718	30	0
HT4-9	LG5	3438725	0	30
HT4-9	LG5	5616124	0	23
HT4-9	LG5	13925514	0	49
HT4-9	LG5	16201112	18	2
HT4-9	LG5	21022151	0	164
HT4-9	LG5	21022164	12747	38
HT4-9	LG5	21022215	757	23169
HT4-9	LG5	21022236	474	23457
HT4-9	LG5	21022256	492	23273
HT4-9	LG5	21022272	251	23668
HT4-9	LG5	21022279	296	23667
HT4-9	LG5	21022305	3	57
HT4-9	LG5	21022652	528	0
HT4-9	LG5	21023742	1465	6
LT1-10	LG5	21022164	431	2
LT1-10	LG5	21022215	1139	193
LT1-10	LG5	21022236	721	225
LT1-10	LG5	21022256	687	247
LT1-10	LG5	21022272	474	419
LT1-10	LG5	21022279	509	421
LT1-10	LG5	21022305	0	129
LT1-10	LG5	21022652	1104	6
LT1-10	LG5	21023736	0	20
LT1-10	LG5	21023742	6642	39
LT1-11	LG5	21022164	218	1
LT1-11	LG5	21022215	816	172
LT1-11	LG5	21022236	562	228
LT1-11	LG5	21022256	579	196
LT1-11	LG5	21022272	405	337
LT1-11	LG5	21022279	495	283
LT1-11	LG5	21022305	0	130
LT1-11	LG5	21022652	576	1
LT1-11	LG5	21023742	3097	12
LT1-12	LG5	21022164	632	0
LT1-12	LG5	21022215	768	49
LT1-12	LG5	21022236	174	39
LT1-12	LG5	21022256	165	41
LT1-12	LG5	21022272	129	68
LT1-12	LG5	21022279	148	50
LT1-12	LG5	21022305	1	37
LT1-12	LG5	21023742	932	4
LT1-13	LG5	21022164	148	0
LT1-13	LG5	21022215	278	32
LT1-13	LG5	21022236	135	30
LT1-13	LG5	21022256	141	18
LT1-13	LG5	21022272	103	59
LT1-13	LG5	21022279	106	56
LT1-13	LG5	21022305	0	30
LT1-13	LG5	21022652	33	0
LT1-13	LG5	21023742	533	2
LT1-14	LG5	17250797	22	0
LT1-14	LG5	17250803	0	22
LT1-14	LG5	17250809	0	22
LT1-14	LG5	21022164	723	2
LT1-14	LG5	21022215	1334	160
LT1-14	LG5	21022236	642	166
LT1-14	LG5	21022256	662	145
LT1-14	LG5	21022272	470	303
LT1-14	LG5	21022279	580	230
LT1-14	LG5	21022305	0	131
LT1-14	LG5	21022652	56	0
LT1-14	LG5	21023742	3717	27
LT1-16	LG5	21022164	192	1
LT1-16	LG5	21022215	519	102
LT1-16	LG5	21022236	389	90
LT1-16	LG5	21022256	383	90
LT1-16	LG5	21022272	300	152
LT1-16	LG5	21022279	378	97
LT1-16	LG5	21022305	0	63
LT1-16	LG5	21022652	42	1
LT1-16	LG5	21023742	1895	15
LT1-17	LG5	21022164	231	1
LT1-17	LG5	21022215	1752	281
LT1-17	LG5	21022236	1470	428
LT1-17	LG5	21022256	1432	426
LT1-17	LG5	21022272	1074	745
LT1-17	LG5	21022279	1139	752
LT1-17	LG5	21022305	2	308
LT1-17	LG5	21022652	2066	4
LT1-17	LG5	21023620	11	11
LT1-17	LG5	21023736	0	25
LT1-17	LG5	21023742	10016	39
LT1-18	LG5	21022164	25	1
LT1-18	LG5	21022215	2070	350
LT1-18	LG5	21022236	1906	519
LT1-18	LG5	21022256	1917	513
LT1-18	LG5	21022272	1360	991
LT1-18	LG5	21022279	1590	842
LT1-18	LG5	21022305	2	388
LT1-18	LG5	21022652	126	0
LT1-18	LG5	21023736	0	26
LT1-18	LG5	21023742	9320	41
LT1-19	LG5	21022164	120	0
LT1-19	LG5	21022215	354	53
LT1-19	LG5	21022236	250	54
LT1-19	LG5	21022256	218	72
LT1-19	LG5	21022272	171	113
LT1-19	LG5	21022279	180	116
LT1-19	LG5	21022305	0	43
LT1-19	LG5	21022652	223	0
LT1-19	LG5	21023742	1253	7
LT1-20	LG5	21022164	37	1
LT1-20	LG5	21022215	612	148
LT1-20	LG5	21022236	553	180
LT1-20	LG5	21022256	533	194
LT1-20	LG5	21022272	383	332
LT1-20	LG5	21022279	433	297
LT1-20	LG5	21022305	1	117
LT1-20	LG5	21022652	91	1
LT1-20	LG5	21023742	3751	7
LT1-3	LG5	21022164	412	0
LT1-3	LG5	21022215	2426	422
LT1-3	LG5	21022236	1984	548
LT1-3	LG5	21022256	1980	531
LT1-3	LG5	21022272	1482	923
LT1-3	LG5	21022279	1847	667
LT1-3	LG5	21022305	0	384
LT1-3	LG5	21022652	2836	7
LT1-3	LG5	21023736	0	31
LT1-3	LG5	21023742	13590	52
LT1-4	LG5	21022215	35	5
LT1-4	LG5	21022236	32	6
LT1-4	LG5	21022256	36	2
LT1-4	LG5	21022272	20	20
LT1-4	LG5	21022279	23	15
LT1-4	LG5	21023742	39	1
LT1-5	LG5	21022164	80	0
LT1-5	LG5	21022215	351	61
LT1-5	LG5	21022236	245	107
LT1-5	LG5	21022256	277	57
LT1-5	LG5	21022272	206	110
LT1-5	LG5	21022279	249	84
LT1-5	LG5	21022305	0	59
LT1-5	LG5	21022652	51	0
LT1-5	LG5	21023742	1991	4
LT1-6	LG5	21022164	27	0
LT1-6	LG5	21022215	87	19
LT1-6	LG5	21022236	55	20
LT1-6	LG5	21022256	56	24
LT1-6	LG5	21022272	36	39
LT1-6	LG5	21022279	44	34
LT1-6	LG5	21023742	375	0
LT1-7	LG5	21022164	22	0
LT1-7	LG5	21022215	499	90
LT1-7	LG5	21022236	451	119
LT1-7	LG5	21022256	433	136
LT1-7	LG5	21022272	295	256
LT1-7	LG5	21022279	374	190
LT1-7	LG5	21022305	0	98
LT1-7	LG5	21022652	1150	5
LT1-7	LG5	21023742	1355	5
LT1-9	LG5	21022164	328	0
LT1-9	LG5	21022215	820	112
LT1-9	LG5	21022236	459	168
LT1-9	LG5	21022256	475	137
LT1-9	LG5	21022272	339	258
LT1-9	LG5	21022279	402	227
LT1-9	LG5	21022305	0	80
LT1-9	LG5	21022652	1719	4
LT1-9	LG5	21023742	53	0
LT2-10	LG5	21022164	1225	3
LT2-10	LG5	21022215	2615	268
LT2-10	LG5	21022236	1353	365
LT2-10	LG5	21022256	1342	360
LT2-10	LG5	21022272	997	671
LT2-10	LG5	21022279	1134	598
LT2-10	LG5	21022305	1	267
LT2-10	LG5	21022652	2366	16
LT2-10	LG5	21023700	1	26
LT2-10	LG5	21023742	3099	13
LT2-12	LG5	1548107	41	2
LT2-12	LG5	21022164	2251	6
LT2-12	LG5	21022215	2535	222
LT2-12	LG5	21022236	377	200
LT2-12	LG5	21022256	348	227
LT2-12	LG5	21022272	246	317
LT2-12	LG5	21022279	282	310
LT2-12	LG5	21022305	0	54
LT2-12	LG5	21022652	685	2
LT2-12	LG5	21023742	1947	3
LT2-12	LG5	23893415	0	25
LT2-13	LG5	17250797	23	0
LT2-13	LG5	17250803	0	23
LT2-13	LG5	17250809	0	23
LT2-13	LG5	21022151	0	89
LT2-13	LG5	21022164	9209	19
LT2-13	LG5	21022215	8971	6043
LT2-13	LG5	21022236	7675	3713
LT2-13	LG5	21022256	5329	6013
LT2-13	LG5	21022272	5118	6252
LT2-13	LG5	21022279	5241	6164
LT2-13	LG5	21022305	2	32
LT2-13	LG5	21022652	269	1
LT2-13	LG5	21023742	1270	3
LT2-13	LG5	23893415	0	59
LT2-14	LG5	13925514	0	23
LT2-14	LG5	17250797	23	0
LT2-14	LG5	17250803	0	23
LT2-14	LG5	17250809	0	23
LT2-14	LG5	21022151	0	143
LT2-14	LG5	21022164	16753	37
LT2-14	LG5	21022215	19632	6566
LT2-14	LG5	21022236	11560	6700
LT2-14	LG5	21022256	11668	6553
LT2-14	LG5	21022272	11067	7076
LT2-14	LG5	21022279	11361	6944
LT2-14	LG5	21022305	3	162
LT2-14	LG5	21022652	1293	3
LT2-14	LG5	21023742	3548	6
LT2-14	LG5	23893415	0	90
LT2-16	LG5	695342	0	65
LT2-16	LG5	1548107	108	9
LT2-16	LG5	3438718	29	0
LT2-16	LG5	3438725	0	29
LT2-16	LG5	13925514	0	70
LT2-16	LG5	17250797	118	0
LT2-16	LG5	17250803	0	118
LT2-16	LG5	17250809	0	118
LT2-16	LG5	17292931	29	0
LT2-16	LG5	21022151	1	434
LT2-16	LG5	21022164	46630	80
LT2-16	LG5	21022175	0	28
LT2-16	LG5	21022215	53053	801
LT2-16	LG5	21022236	13873	386
LT2-16	LG5	21022256	14017	279
LT2-16	LG5	21022272	13579	597
LT2-16	LG5	21022279	13942	362
LT2-16	LG5	21022305	4	120
LT2-16	LG5	21022652	699	1
LT2-16	LG5	21023742	3285	12
LT2-16	LG5	23893415	0	384
LT2-16	LG5	25655902	0	34
LT2-16	LG5	26725733	43	4
LT2-17	LG5	695342	0	22
LT2-17	LG5	1548107	41	2
LT2-17	LG5	13925514	0	67
LT2-17	LG5	16201112	40	1
LT2-17	LG5	17250797	48	0
LT2-17	LG5	17250803	0	48
LT2-17	LG5	17250809	0	48
LT2-17	LG5	21022151	0	132
LT2-17	LG5	21022164	14970	20
LT2-17	LG5	21022215	15882	454
LT2-17	LG5	21022236	1065	370
LT2-17	LG5	21022256	1028	386
LT2-17	LG5	21022272	784	590
LT2-17	LG5	21022279	1021	413
LT2-17	LG5	21022305	0	210
LT2-17	LG5	21022652	2303	9
LT2-17	LG5	21023742	2085	6
LT2-17	LG5	23893415	0	151
LT2-17	LG5	31765369	0	25
LT2-18	LG5	21022164	2043	4
LT2-18	LG5	21022215	2248	138
LT2-18	LG5	21022236	275	119
LT2-18	LG5	21022256	286	105
LT2-18	LG5	21022272	213	176
LT2-18	LG5	21022279	240	156
LT2-18	LG5	21022305	1	39
LT2-18	LG5	21022652	143	1
LT2-18	LG5	21023742	1456	3
LT2-19	LG5	1548107	24	1
LT2-19	LG5	17250797	20	0
LT2-19	LG5	17250803	0	20
LT2-19	LG5	17250809	0	20
LT2-19	LG5	21022151	0	56
LT2-19	LG5	21022164	6786	15
LT2-19	LG5	21022215	7250	315
LT2-19	LG5	21022236	528	283
LT2-19	LG5	21022256	534	270
LT2-19	LG5	21022272	380	407
LT2-19	LG5	21022279	483	332
LT2-19	LG5	21022305	0	144
LT2-19	LG5	21022652	360	1
LT2-19	LG5	21023742	2716	13
LT2-19	LG5	23893415	0	94
LT2-1	LG5	1548107	226	1
LT2-1	LG5	17079216	7	48
LT2-1	LG5	17250797	21	0
LT2-1	LG5	17250803	0	21
LT2-1	LG5	17250809	0	21
LT2-1	LG5	21022151	0	243
LT2-1	LG5	21022164	26190	81
LT2-1	LG5	21022215	8310	36351
LT2-1	LG5	21022236	947	36603
LT2-1	LG5	21022256	1007	36356
LT2-1	LG5	21022272	629	36902
LT2-1	LG5	21022279	724	36861
LT2-1	LG5	21022305	8	119
LT2-1	LG5	21022652	379	2
LT2-1	LG5	21023742	3647	15
LT2-1	LG5	23893415	0	376
LT2-1	LG5	31765369	0	46
LT2-20	LG5	21022164	37	0
LT2-20	LG5	21022215	43	30
LT2-20	LG5	21022236	26	30
LT2-20	LG5	21022256	26	27
LT2-20	LG5	21022272	16	36
LT2-20	LG5	21022279	19	36
LT2-20	LG5	21023742	110	0
LT2-2	LG5	17250797	22	1
LT2-2	LG5	17250803	0	23
LT2-2	LG5	17250809	0	23
LT2-2	LG5	21022151	0	88
LT2-2	LG5	21022164	11230	18
LT2-2	LG5	21022215	16487	336
LT2-2	LG5	21022236	11156	342
LT2-2	LG5	21022256	11274	217
LT2-2	LG5	21022272	10852	549
LT2-2	LG5	21022279	11202	319
LT2-2	LG5	21022305	9	55
LT2-2	LG5	21022652	622	2
LT2-2	LG5	21023742	1100	3
LT2-2	LG5	23893415	0	53
LT2-3	LG5	1308300	0	20
LT2-3	LG5	1308304	0	20
LT2-3	LG5	1548107	96	7
LT2-3	LG5	13925514	0	35
LT2-3	LG5	17250797	41	0
LT2-3	LG5	17250803	0	41
LT2-3	LG5	17250809	0	41
LT2-3	LG5	21022151	0	268
LT2-3	LG5	21022164	26784	55
LT2-3	LG5	21022175	0	21
LT2-3	LG5	21022215	12981	28179
LT2-3	LG5	21022236	719	28894
LT2-3	LG5	21022256	659	28793
LT2-3	LG5	21022272	364	29186
LT2-3	LG5	21022279	428	29192
LT2-3	LG5	21022305	4	55
LT2-3	LG5	21022652	78	0
LT2-3	LG5	21023742	1286	6
LT2-3	LG5	23893415	0	122
LT2-3	LG5	26725733	20	0
LT2-3	LG5	31765369	0	29
LT2-4	LG5	695342	0	20
LT2-4	LG5	1548107	52	2
LT2-4	LG5	13925514	0	50
LT2-4	LG5	17250797	65	0
LT2-4	LG5	17250803	0	65
LT2-4	LG5	17250809	0	65
LT2-4	LG5	21022151	0	262
LT2-4	LG5	21022164	24982	38
LT2-4	LG5	21022215	26384	416
LT2-4	LG5	21022236	3428	159
LT2-4	LG5	21022256	3472	104
LT2-4	LG5	21022272	3306	227
LT2-4	LG5	21022279	3432	146
LT2-4	LG5	21022305	0	29
LT2-4	LG5	21022652	144	2
LT2-4	LG5	21023742	1052	3
LT2-4	LG5	23893415	0	273
LT2-4	LG5	26725733	19	1
LT2-6	LG5	1548107	46	0
LT2-6	LG5	3438718	27	0
LT2-6	LG5	3438725	0	27
LT2-6	LG5	21022151	0	22
LT2-6	LG5	21022164	3536	9
LT2-6	LG5	21022215	7126	710
LT2-6	LG5	21022236	3392	994
LT2-6	LG5	21022256	3655	728
LT2-6	LG5	21022272	2337	1827
LT2-6	LG5	21022279	3264	1143
LT2-6	LG5	21022305	1	618
LT2-6	LG5	21022652	470	1
LT2-6	LG5	21023602	7	16
LT2-6	LG5	21023620	15	9
LT2-6	LG5	21023736	0	52
LT2-6	LG5	21023742	18639	48
LT2-6	LG5	23893415	0	55
LT2-7	LG5	21022151	0	52
LT2-7	LG5	21022164	6072	20
LT2-7	LG5	21022215	3517	7741
LT2-7	LG5	21022236	1163	7897
LT2-7	LG5	21022256	1174	7817
LT2-7	LG5	21022272	820	8169
LT2-7	LG5	21022279	981	8079
LT2-7	LG5	21022305	3	232
LT2-7	LG5	21022652	2681	5
LT2-7	LG5	21023742	923	0
LT2-8	LG5	21022164	135	2
LT2-8	LG5	21022215	1212	310
LT2-8	LG5	21022236	1109	377
LT2-8	LG5	21022256	1145	323
LT2-8	LG5	21022272	843	571
LT2-8	LG5	21022279	1019	467
LT2-8	LG5	21022305	1	207
LT2-8	LG5	21022652	3403	12
LT2-8	LG5	21023736	0	22
LT2-8	LG5	21023742	7337	26
LT2-9	LG5	21022164	100	1
LT2-9	LG5	21022215	459	120
LT2-9	LG5	21022236	408	140
LT2-9	LG5	21022256	414	129
LT2-9	LG5	21022272	295	239
LT2-9	LG5	21022279	411	146
LT2-9	LG5	21022305	0	70
LT2-9	LG5	21022652	194	0
LT2-9	LG5	21023742	1858	6
LT3-10	LG5	17250797	37	0
LT3-10	LG5	17250803	0	37
LT3-10	LG5	17250809	0	37
LT3-10	LG5	21022164	789	3
LT3-10	LG5	21022215	2554	487
LT3-10	LG5	21022236	1804	513
LT3-10	LG5	21022256	1812	510
LT3-10	LG5	21022272	1282	950
LT3-10	LG5	21022279	1680	623
LT3-10	LG5	21022305	2	441
LT3-10	LG5	21022652	83	1
LT3-10	LG5	21023736	0	21
LT3-10	LG5	21023742	9715	42
LT3-11	LG5	21022164	72	0
LT3-11	LG5	21022215	118	15
LT3-11	LG5	21022236	41	21
LT3-11	LG5	21022256	46	12
LT3-11	LG5	21022272	33	25
LT3-11	LG5	21022279	44	16
LT3-11	LG5	21022652	80	2
LT3-11	LG5	21023742	137	3
LT3-12	LG5	21022215	456	88
LT3-12	LG5	21022236	405	134
LT3-12	LG5	21022256	396	138
LT3-12	LG5	21022272	276	230
LT3-12	LG5	21022279	306	234
LT3-12	LG5	21022305	0	88
LT3-12	LG5	21022652	65	0
LT3-12	LG5	21023742	2408	11
LT3-13	LG5	21022164	189	0
LT3-13	LG5	21022215	227	7
LT3-13	LG5	21022236	40	9
LT3-13	LG5	21022256	45	3
LT3-13	LG5	21022272	36	14
LT3-13	LG5	21022279	40	9
LT3-13	LG5	21023742	305	4
LT3-17	LG5	21022215	58	12
LT3-17	LG5	21022236	46	14
LT3-17	LG5	21022256	47	13
LT3-17	LG5	21022272	35	22
LT3-17	LG5	21022279	54	7
LT3-17	LG5	21022652	161	0
LT3-19	LG5	21022164	157	1
LT3-19	LG5	21022215	505	77
LT3-19	LG5	21022236	344	101
LT3-19	LG5	21022256	344	90
LT3-19	LG5	21022272	256	163
LT3-19	LG5	21022279	296	138
LT3-19	LG5	21022305	0	82
LT3-19	LG5	21022652	28	0
LT3-19	LG5	21023742	2059	11
LT3-1	LG5	21022164	109	0
LT3-1	LG5	21022215	402	62
LT3-1	LG5	21022236	271	84
LT3-1	LG5	21022256	270	77
LT3-1	LG5	21022272	186	143
LT3-1	LG5	21022279	202	139
LT3-1	LG5	21022305	0	60
LT3-1	LG5	21022652	33	0
LT3-1	LG5	21023742	1657	12
LT3-20	LG5	21022164	532	1
LT3-20	LG5	21022215	814	100
LT3-20	LG5	21022236	322	85
LT3-20	LG5	21022256	298	99
LT3-20	LG5	21022272	205	170
LT3-20	LG5	21022279	255	140
LT3-20	LG5	21022305	0	56
LT3-20	LG5	21022652	20	0
LT3-20	LG5	21023742	2735	18
LT3-21	LG5	21022164	165	0
LT3-21	LG5	21022215	223	18
LT3-21	LG5	21022236	69	21
LT3-21	LG5	21022256	58	30
LT3-21	LG5	21022272	52	35
LT3-21	LG5	21022279	60	29
LT3-21	LG5	21023742	432	9
LT3-22	LG5	21022164	143	0
LT3-22	LG5	21022215	548	62
LT3-22	LG5	21022236	432	80
LT3-22	LG5	21022256	440	56
LT3-22	LG5	21022272	297	175
LT3-22	LG5	21022279	394	96
LT3-22	LG5	21022305	1	82
LT3-22	LG5	21022652	30	0
LT3-22	LG5	21023742	2902	13
LT3-23	LG5	17250797	37	0
LT3-23	LG5	17250803	0	37
LT3-23	LG5	17250809	0	37
LT3-23	LG5	21022164	831	2
LT3-23	LG5	21022215	2064	283
LT3-23	LG5	21022236	1306	313
LT3-23	LG5	21022256	1306	299
LT3-23	LG5	21022272	1035	524
LT3-23	LG5	21022279	1306	322
LT3-23	LG5	21022305	1	241
LT3-23	LG5	21022652	141	3
LT3-23	LG5	21023736	0	21
LT3-23	LG5	21023742	7646	33
LT3-2	LG5	21022164	20	0
LT3-2	LG5	21022215	332	65
LT3-2	LG5	21022236	289	89
LT3-2	LG5	21022256	304	77
LT3-2	LG5	21022272	203	171
LT3-2	LG5	21022279	236	152
LT3-2	LG5	21022305	0	59
LT3-2	LG5	21023742	1765	6
LT3-3	LG5	21022164	37	0
LT3-3	LG5	21022215	59	8
LT3-3	LG5	21022236	20	11
LT3-3	LG5	21022256	29	2
LT3-3	LG5	21022272	23	10
LT3-3	LG5	21022279	23	9
LT3-3	LG5	21022652	93	1
LT3-5	LG5	21022164	111	0
LT3-5	LG5	21022215	1428	236
LT3-5	LG5	21022236	1279	318
LT3-5	LG5	21022256	1239	341
LT3-5	LG5	21022272	848	670
LT3-5	LG5	21022279	975	623
LT3-5	LG5	21022305	0	269
LT3-5	LG5	21022652	132	0
LT3-5	LG5	21023736	0	27
LT3-5	LG5	21023742	8217	30
LT3-6	LG5	21022164	110	1
LT3-6	LG5	21022215	164	6
LT3-6	LG5	21022236	56	9
LT3-6	LG5	21022256	35	29
LT3-6	LG5	21022272	27	35
LT3-6	LG5	21022279	34	30
LT3-6	LG5	21022652	136	0
LT3-6	LG5	21023742	22	0
LT3-8	LG5	21022164	220	0
LT3-8	LG5	21022215	3181	521
LT3-8	LG5	21022236	2703	823
LT3-8	LG5	21022256	2749	777
LT3-8	LG5	21022272	1960	1429
LT3-8	LG5	21022279	2184	1369
LT3-8	LG5	21022305	4	606
LT3-8	LG5	21022652	195	0
LT3-8	LG5	21023602	9	18
LT3-8	LG5	21023620	12	8
LT3-8	LG5	21023736	0	49
LT3-8	LG5	21023742	17878	73
LT3-9	LG5	17250797	23	0
LT3-9	LG5	17250803	0	23
LT3-9	LG5	17250809	0	23
LT3-9	LG5	21022164	366	0
LT3-9	LG5	21022215	1732	445
LT3-9	LG5	21022236	1343	514
LT3-9	LG5	21022256	1396	435
LT3-9	LG5	21022272	1099	662
LT3-9	LG5	21022279	1374	466
LT3-9	LG5	21022305	3	296
LT3-9	LG5	21022652	83	1
LT3-9	LG5	21023742	8712	27
LT4-10	LG5	17250797	21	0
LT4-10	LG5	17250803	0	21
LT4-10	LG5	17250809	0	21
LT4-10	LG5	21022151	0	36
LT4-10	LG5	21022164	3984	7
LT4-10	LG5	21022215	4008	822
LT4-10	LG5	21022236	465	819
LT4-10	LG5	21022256	424	848
LT4-10	LG5	21022272	285	986
LT4-10	LG5	21022279	359	923
LT4-10	LG5	21022305	0	71
LT4-10	LG5	21022652	34	1
LT4-10	LG5	21023742	2732	14
LT4-10	LG5	23893415	0	41
LT4-11	LG5	695342	0	21
LT4-11	LG5	1548107	32	2
LT4-11	LG5	13925514	0	31
LT4-11	LG5	17250797	66	0
LT4-11	LG5	17250803	0	66
LT4-11	LG5	17250809	0	66
LT4-11	LG5	21022151	0	165
LT4-11	LG5	21022164	17091	36
LT4-11	LG5	21022215	17157	294
LT4-11	LG5	21022236	284	126
LT4-11	LG5	21022256	311	84
LT4-11	LG5	21022272	218	169
LT4-11	LG5	21022279	273	132
LT4-11	LG5	21022305	1	55
LT4-11	LG5	21022652	136	0
LT4-11	LG5	21023742	1415	2
LT4-11	LG5	23893415	0	160
LT4-13	LG5	695342	0	32
LT4-13	LG5	1548107	39	4
LT4-13	LG5	13925514	0	47
LT4-13	LG5	17250797	96	0
LT4-13	LG5	17250803	0	96
LT4-13	LG5	17250809	0	96
LT4-13	LG5	21022151	0	343
LT4-13	LG5	21022164	35753	60
LT4-13	LG5	21022175	0	37
LT4-13	LG5	21022215	41885	526
LT4-13	LG5	21022236	13115	471
LT4-13	LG5	21022256	13442	148
LT4-13	LG5	21022272	13052	418
LT4-13	LG5	21022279	13314	269
LT4-13	LG5	21022305	2	55
LT4-13	LG5	21022652	58	0
LT4-13	LG5	21023742	1824	9
LT4-13	LG5	23893415	0	284
LT4-13	LG5	26725733	20	1
LT4-14	LG5	21022151	0	94
LT4-14	LG5	21022164	9304	27
LT4-14	LG5	21022215	9368	8805
LT4-14	LG5	21022236	9264	8999
LT4-14	LG5	21022256	9409	8821
LT4-14	LG5	21022272	9020	9150
LT4-14	LG5	21022279	9297	8993
LT4-14	LG5	21022305	3	25
LT4-14	LG5	21022652	91	1
LT4-14	LG5	21023742	564	2
LT4-15	LG5	21022151	0	28
LT4-15	LG5	21022164	1742	4
LT4-15	LG5	21022215	498	3138
LT4-15	LG5	21022236	374	3246
LT4-15	LG5	21022256	328	3281
LT4-15	LG5	21022272	201	3392
LT4-15	LG5	21022279	229	3393
LT4-15	LG5	21022305	0	58
LT4-15	LG5	21022652	33	0
LT4-15	LG5	21023742	1696	6
LT4-17	LG5	21022164	91	1
LT4-17	LG5	21022215	123	45
LT4-17	LG5	21022236	82	46
LT4-17	LG5	21022256	83	42
LT4-17	LG5	21022272	79	44
LT4-17	LG5	21022279	93	37
LT4-17	LG5	21022652	43	0
LT4-17	LG5	21023742	205	1
LT4-18	LG5	21022151	0	195
LT4-18	LG5	21022164	15861	38
LT4-18	LG5	21022215	26545	4846
LT4-18	LG5	21022236	26583	4983
LT4-18	LG5	21022256	26784	4815
LT4-18	LG5	21022272	26086	5317
LT4-18	LG5	21022279	26659	5017
LT4-18	LG5	21022305	6	111
LT4-18	LG5	21022652	75	0
LT4-18	LG5	21023742	2707	10
LT4-19	LG5	1548107	35	1
LT4-19	LG5	3438718	25	0
LT4-19	LG5	3438725	0	25
LT4-19	LG5	13925514	0	24
LT4-19	LG5	17250797	28	1
LT4-19	LG5	17250803	0	29
LT4-19	LG5	17250809	0	29
LT4-19	LG5	21022151	0	117
LT4-19	LG5	21022164	12338	32
LT4-19	LG5	21022175	0	20
LT4-19	LG5	21022215	6777	11205
LT4-19	LG5	21022236	210	11284
LT4-19	LG5	21022256	217	11197
LT4-19	LG5	21022272	128	11334
LT4-19	LG5	21022279	124	11376
LT4-19	LG5	21022652	78	0
LT4-19	LG5	21023742	554	1
LT4-19	LG5	23893415	0	70
LT4-19	LG5	31765369	0	22
LT4-1	LG5	21022151	0	39
LT4-1	LG5	21022164	3637	4
LT4-1	LG5	21022215	3762	86
LT4-1	LG5	21022236	177	54
LT4-1	LG5	21022256	169	60
LT4-1	LG5	21022272	126	94
LT4-1	LG5	21022279	159	72
LT4-1	LG5	21022305	0	40
LT4-1	LG5	21022652	20	0
LT4-1	LG5	21023742	1459	2
LT4-1	LG5	23893415	0	30
LT4-20	LG5	1548107	49	0
LT4-20	LG5	17079216	1	25
LT4-20	LG5	21022164	140	0
LT4-20	LG5	21022215	329	70
LT4-20	LG5	21022236	235	87
LT4-20	LG5	21022256	219	90
LT4-20	LG5	21022272	166	142
LT4-20	LG5	21022279	203	120
LT4-20	LG5	21022305	0	31
LT4-20	LG5	21022652	43	0
LT4-20	LG5	21023742	1340	2
LT4-20	LG5	23893415	0	20
LT4-20	LG5	31765369	0	41
LT4-2	LG5	13925514	0	39
LT4-2	LG5	21022164	118	1
LT4-2	LG5	21022215	313	63
LT4-2	LG5	21022236	211	95
LT4-2	LG5	21022256	216	89
LT4-2	LG5	21022272	176	124
LT4-2	LG5	21022279	197	110
LT4-2	LG5	21022305	0	41
LT4-2	LG5	21022652	46	0
LT4-2	LG5	21023742	1835	9
LT4-3	LG5	21022151	0	50
LT4-3	LG5	21022164	5154	9
LT4-3	LG5	21022215	1867	6782
LT4-3	LG5	21022236	206	6845
LT4-3	LG5	21022256	156	6865
LT4-3	LG5	21022272	96	6947
LT4-3	LG5	21022279	122	6934
LT4-3	LG5	21023742	369	2
LT4-3	LG5	31765369	0	32
LT4-5	LG5	21022151	0	90
LT4-5	LG5	21022164	9018	31
LT4-5	LG5	21022215	8799	3857
LT4-5	LG5	21022236	3541	3827
LT4-5	LG5	21022256	3525	3848
LT4-5	LG5	21022272	3333	3995
LT4-5	LG5	21022279	3465	3908
LT4-5	LG5	21022305	0	56
LT4-5	LG5	21022652	59	0
LT4-5	LG5	21023742	1528	4
LT4-5	LG5	23893415	0	60
LT4-6	LG5	17250797	23	0
LT4-6	LG5	17250803	0	23
LT4-6	LG5	17250809	0	23
LT4-6	LG5	21022151	0	58
LT4-6	LG5	21022164	5747	10
LT4-6	LG5	21022215	3755	4090
LT4-6	LG5	21022236	157	4115
LT4-6	LG5	21022256	145	4099
LT4-6	LG5	21022272	105	4154
LT4-6	LG5	21022279	122	4143
LT4-6	LG5	21022652	31	0
LT4-6	LG5	21023742	533	2
LT4-6	LG5	23893415	0	37
LT4-7	LG5	695342	0	20
LT4-7	LG5	1548107	33	2
LT4-7	LG5	13925514	0	32
LT4-7	LG5	17250797	59	1
LT4-7	LG5	17250803	0	60
LT4-7	LG5	17250809	0	60
LT4-7	LG5	21022151	0	147
LT4-7	LG5	21022164	17812	30
LT4-7	LG5	21022215	18045	486
LT4-7	LG5	21022236	106	833
LT4-7	LG5	21022256	110	831
LT4-7	LG5	21022272	95	857
LT4-7	LG5	21022279	94	856
LT4-7	LG5	21022305	1	266
LT4-7	LG5	21022652	55	0
[truncated: 1,184 more rows]

## Sheet: other_genes_methylation
Sample	Chromosome	Position	Strand	Methylated Cs	Unmethylated Cs
HAVM19	LG1B	1832030	-	2	0
HAVM19	LG1B	1832070	-	1	1
HAVM19	LG1B	1832162	-	2	0
HAVM19	LG1B	1832169	-	1	1
HAVM19	LG1B	1832177	-	2	0
HAVM19	LG1B	1832181	-	2	0
HAVM19	LG1B	1832227	-	1	1
HAVM19	LG1B	11628807	+	10932	263
HAVM19	LG1B	11628870	+	10824	378
HAVM19	LG1B	11628892	+	10898	290
HAVM19	LG1B	11628926	+	11107	30
HAVM19	LG12	22701256	+	3671	78
HAVM19	LG12	22701264	+	3664	87
HAVM19	LG12	22701279	+	3663	89
HAVM19	LG12	22701428	+	3711	3
HAVM19	LG20	9089129	+	0	1
HAVM19	LG20	9089136	+	0	1
HAVM19	LG20	9089173	+	0	1
HAVM19	LG20	9089179	+	0	1
HAVM19	LG20	9089194	+	0	1
HAVM19	LG20	9089196	+	0	1
HAVM19	LG20	9089199	+	0	1
HAVM19	LG20	9089225	+	0	1
HAVM19	LG20	18505626	+	0	3
HAVM19	LG20	18505637	+	0	3
HAVM19	LG20	18505654	+	0	3
HAVM19	LG20	18505680	+	0	3
HAVM19	LG20	18505688	+	1	2
HAVM19	LG20	18505698	+	0	3
HAVM19	LG20	18505732	+	1	2
HAVM19	LG20	18505747	+	2	1
HAVM19	LG20	18505791	+	1	2
HAVM19	LG20	18505797	+	1	2
HAVM19	LG20	18505890	+	0	3
HAVM19	LG20	18505904	+	2	1
HAVM19	LG20	18505945	+	0	3
HAVM19	LG20	18505959	+	1	2
HAVM19	LG20	18505990	+	1	2
HAVM19	LG14	28362353	+	0	3
HAVM19	LG14	28362356	+	0	3
HAVM19	LG14	28362455	+	3	0
HAVM19	LG14	28362484	+	3	0
HAVM19	LG14	28362494	+	3	0
HAVM19	LG11	6883140	+	0	1
HAVM19	LG11	6883152	+	0	1
HAVM19	LG11	6883161	+	0	1
HAVM19	LG11	6883172	+	0	1
HAVM19	LG11	6883193	+	0	1
HAVM19	LG11	6883202	+	0	1
HAVM19	LG11	6883233	+	0	1
HAVM19	LG11	6883245	+	0	1
HAVM19	LG11	6883250	+	0	1
HAVM19	LG11	6883257	+	0	1
HAVM19	LG11	6883265	+	0	1
HAVM19	LG11	6883276	+	0	1
HAVM19	LG11	6883322	+	0	1
HAVM19	LG11	6883325	+	1	0
HAVM19	LG1A	20275424	-	3539	16
HAVM19	LG1A	20275509	-	3104	478
HAVM19	LG1A	20275623	-	2628	950
HAVM19	LG2	10393124	-	109	1
HAVM19	LG2	10393134	-	109	0
HAVM19	LG2	10393152	-	0	110
HAVM19	LG2	10393170	-	0	110
HAVM19	LG2	10393189	-	0	110
HAVM19	LG2	10393191	-	2	108
HAVM19	LG2	10393198	-	0	109
HAVM19	LG2	10393211	-	0	108
HAVM19	LG2	10393219	-	0	110
HAVM19	LG2	10393225	-	0	110
HAVM19	LG2	10393231	-	0	110
HAVM19	LG2	10393240	-	0	110
HAVM19	LG2	10393252	-	1	109
HAVM19	LG2	10393254	-	0	110
HAVM19	LG2	10393323	-	0	110
HAVM19	LG2	10393364	-	0	110
HAVM19	LG2	10393371	-	1	109
HAVM19	LG2	10393373	-	0	110
HAVM19	LG2	10393404	-	0	109
HAVM19	LG2	10393441	-	0	109
HAVM19	LG2	10393444	-	1	108
HAVM19	LG22-25	24752944	-	1	0
HAVM19	LG22-25	24753059	-	1	0
HAVM38	LG1B	11628807	+	4706	110
HAVM38	LG1B	11628870	+	4664	153
HAVM38	LG1B	11628892	+	4687	128
HAVM38	LG1B	11628926	+	4773	12
HAVM38	LG12	22701256	+	1343	35
HAVM38	LG12	22701264	+	1340	42
HAVM38	LG12	22701279	+	1338	45
HAVM38	LG12	22701428	+	1369	3
HAVM38	LG3	78269	+	2	0
HAVM38	LG3	78301	+	0	2
HAVM38	LG3	78312	+	0	2
HAVM38	LG3	78343	+	0	2
HAVM38	LG3	78394	+	0	2
HAVM38	LG3	78426	+	0	2
HAVM38	LG3	78429	+	0	2
HAVM38	LG3	78436	+	0	2
HAVM38	LG3	78447	+	0	2
HAVM38	LG3	78450	+	0	2
HAVM38	LG3	78460	+	0	2
HAVM38	LG3	78466	+	0	2
HAVM38	LG3	78511	+	0	2
HAVM38	LG3	78514	+	1	1
HAVM38	LG3	78570	+	0	2
HAVM38	LG3	78587	+	0	2
HAVM38	LG3	78590	+	0	2
HAVM38	LG3	78593	+	0	2
HAVM38	LG3	78596	+	0	2
HAVM38	LG3	78599	+	0	2
HAVM38	LG1A	20275424	-	621	2
HAVM38	LG1A	20275509	-	535	89
HAVM38	LG1A	20275623	-	495	132
HAVM38	LG2	10393124	-	6	0
HAVM38	LG2	10393134	-	6	0
HAVM38	LG2	10393152	-	0	5
HAVM38	LG2	10393170	-	0	6
HAVM38	LG2	10393189	-	0	6
HAVM38	LG2	10393191	-	0	6
HAVM38	LG2	10393198	-	0	6
HAVM38	LG2	10393211	-	0	6
HAVM38	LG2	10393219	-	0	6
HAVM38	LG2	10393225	-	0	6
HAVM38	LG2	10393231	-	0	6
HAVM38	LG2	10393240	-	0	6
HAVM38	LG2	10393252	-	0	6
HAVM38	LG2	10393254	-	0	6
HAVM38	LG2	10393323	-	0	6
HAVM38	LG2	10393364	-	0	6
HAVM38	LG2	10393371	-	0	6
HAVM38	LG2	10393373	-	0	6
HAVM38	LG2	10393404	-	0	6
HAVM38	LG2	10393441	-	0	6
HAVM38	LG2	10393444	-	0	6
HAVM38	LG5	6840623	-	8	0
HAVM39	LG12	22701187	+	0	1
HAVM39	LG12	22701256	+	119315	6269
HAVM39	LG12	22701264	+	120217	5351
HAVM39	LG12	22701279	+	117544	8063
HAVM39	LG12	22701428	+	124103	387
HAVM39	LG1B	11628723	+	0	1
HAVM39	LG1B	11628807	+	71245	11337
HAVM39	LG1B	11628870	+	65972	16863
HAVM39	LG1B	11628892	+	69656	13161
HAVM39	LG1B	11628926	+	82157	147
HAVM39	LG20	9089129	+	0	2
HAVM39	LG20	9089136	+	0	2
HAVM39	LG20	9089173	+	0	2
HAVM39	LG20	9089179	+	0	2
HAVM39	LG20	9089194	+	0	2
HAVM39	LG20	9089196	+	0	2
HAVM39	LG20	9089199	+	0	2
HAVM39	LG20	9089225	+	0	2
HAVM39	LG20	18505626	+	22	815
HAVM39	LG20	18505637	+	15	824
HAVM39	LG20	18505654	+	14	320
HAVM39	LG20	18505680	+	12	803
HAVM39	LG20	18505688	+	48	769
HAVM39	LG20	18505698	+	18	802
HAVM39	LG20	18505732	+	18	803
HAVM39	LG20	18505747	+	47	782
HAVM39	LG20	18505791	+	24	811
HAVM39	LG20	18505797	+	29	811
HAVM39	LG20	18505890	+	90	750
HAVM39	LG20	18505904	+	111	729
HAVM39	LG20	18505945	+	81	758
HAVM39	LG20	18505959	+	124	716
HAVM39	LG20	18505990	+	87	756
HAVM39	LG5	6840623	-	289	93
HAVM39	LG5	12334183	+	1	0
HAVM39	LG5	12334197	+	0	1
HAVM39	LG15	856522	+	1	0
HAVM39	LG15	856582	+	1	0
HAVM39	LG15	856591	+	1	0
HAVM39	LG15	856603	+	1	0
HAVM39	LG15	22974352	+	0	15
HAVM39	LG11	16747931	+	0	4
HAVM39	LG11	16747958	+	4	0
HAVM39	LG11	16748001	+	4	0
HAVM39	LG11	16748012	+	4	0
HAVM39	LG11	16748022	+	0	4
HAVM39	LG13	7386572	+	0	3
HAVM39	LG13	7386575	+	0	3
HAVM39	LG13	7386587	+	0	3
HAVM39	LG13	7386591	+	0	3
HAVM39	LG3	78269	+	1	0
HAVM39	LG3	78301	+	0	1
HAVM39	LG3	78312	+	0	1
HAVM39	LG3	78343	+	0	1
HAVM39	LG3	78394	+	0	1
HAVM39	LG3	78426	+	0	1
HAVM39	LG3	78429	+	0	1
HAVM39	LG3	78436	+	0	1
HAVM39	LG3	78447	+	0	1
HAVM39	LG3	78450	+	0	1
HAVM39	LG3	78460	+	0	1
HAVM39	LG3	78466	+	0	1
HAVM39	LG3	78511	+	0	1
HAVM39	LG3	78514	+	0	1
HAVM39	LG3	78570	+	0	1
HAVM39	LG3	78587	+	0	1
HAVM39	LG3	78590	+	0	1
HAVM39	LG3	78593	+	0	1
HAVM39	LG3	78596	+	0	1
HAVM39	LG3	78599	+	1	0
HAVM39	LG22-25	14602619	+	0	2
HAVM39	LG22-25	14602654	+	0	2
HAVM39	LG22-25	14602657	+	0	2
HAVM39	LG22-25	14602660	+	0	2
HAVM39	LG22-25	14602688	+	0	2
HAVM39	LG22-25	14602691	+	0	2
HAVM39	LG22-25	14602695	+	0	2
HAVM39	LG22-25	14602710	+	0	2
HAVM39	LG22-25	15149579	-	45	0
HAVM39	LG22-25	15149584	-	45	0
HAVM39	LG22-25	24752944	-	3	3
HAVM39	LG22-25	24753059	-	6	0
HAVM39	LG1A	3522237	-	1	0
HAVM39	LG1A	3522259	-	1	0
HAVM39	LG1A	3522266	-	1	0
HAVM39	LG1A	3522291	-	1	0
HAVM39	LG1A	3522303	-	1	0
HAVM39	LG1A	20275424	-	95459	541
HAVM39	LG1A	20275509	-	59758	36899
HAVM39	LG1A	20275623	-	38546	58119
HAVM39	LG1A	20275718	-	0	2
HAVM39	LG1A	23987920	+	1	0
HAVM39	LG2	10393124	-	1108	1
HAVM39	LG2	10393134	-	1110	0
HAVM39	LG2	10393152	-	3	1007
HAVM39	LG2	10393170	-	3	1009
HAVM39	LG2	10393189	-	5	1002
HAVM39	LG2	10393191	-	3	1007
HAVM39	LG2	10393198	-	4	1007
HAVM39	LG2	10393211	-	1	1008
HAVM39	LG2	10393219	-	5	1000
HAVM39	LG2	10393225	-	2	934
HAVM39	LG2	10393231	-	3	937
HAVM39	LG2	10393240	-	10	929
HAVM39	LG2	10393252	-	8	930
HAVM39	LG2	10393254	-	8	926
HAVM39	LG2	10393323	-	2	936
HAVM39	LG2	10393364	-	3	937
HAVM39	LG2	10393371	-	2	937
HAVM39	LG2	10393373	-	5	930
HAVM39	LG2	10393404	-	4	940
HAVM39	LG2	10393441	-	7	938
HAVM39	LG2	10393444	-	1	942
HAVM39	LG10	162769	-	0	1
HAVM39	LG10	162812	-	0	2
HAVM39	LG10	162814	-	0	2
HAVM39	LG10	162817	-	0	2
HAVM39	LG10	162853	-	0	2
HAVM39	LG10	162859	-	0	2
HAVM39	LG10	22759355	-	2	2
HAVM39	LG10	22759382	-	89	0
HAVM39	LG10	22759490	-	89	0
HAVM39	LG10	22759513	-	89	0
HAVM39	LG10	22759540	-	0	89
HAVM39	LGx	14305960	-	0	1
HAVM39	LGx	14305966	-	0	1
HAVM39	LGx	14305973	-	0	1
HAVM39	LGx	14305981	-	0	1
HAVM39	LGx	14305987	-	0	1
HAVM39	LGx	14306034	-	0	1
HAVM39	LGx	14306037	-	0	1
HAVM39	LGx	14306044	-	0	1
HAVM39	LGx	14306048	-	0	1
HAVM39	LGx	14306056	-	0	1
HAVM39	LGx	14306062	-	1	0
HAVM39	LGx	14306070	-	0	1
HAVM39	LGx	14306082	-	0	1
HAVM39	LGx	14306103	-	0	1
HAVM39	LGx	14306107	-	0	1
HAVM39	LGx	14306125	-	0	1
HAVM39	LGx	14306134	-	0	1
HAVM39	LGx	14306148	-	0	1
HAVM39	LGx	14306170	-	0	1
HAVM39	LGx	14306219	-	0	1
HAVM39	LGx	14306273	-	0	1
HAVM39	LG7	14749428	-	2	0
HAVM39	LG7	14749431	-	0	2
HAVM39	LG7	14749457	-	0	2
HAVM39	LG7	14749467	-	2	0
HAVM39	LG7	14749487	-	2	0
HAVM39	LG7	14749491	-	2	0
HAVM41	LG1B	11628807	+	4533	203
HAVM41	LG1B	11628870	+	4463	278
HAVM41	LG1B	11628892	+	4460	283
HAVM41	LG1B	11628926	+	4704	8
HAVM41	LG12	22701256	+	1075	53
HAVM41	LG12	22701264	+	1068	61
HAVM41	LG12	22701279	+	1072	55
HAVM41	LG12	22701428	+	1109	5
HAVM41	LG20	3929059	+	0	19
HAVM41	LG20	3929080	+	19	0
HAVM41	LG20	3929136	+	19	0
HAVM41	LG20	3929156	+	19	0
HAVM41	LG20	3929160	+	19	0
HAVM41	LG20	3929172	+	19	0
HAVM41	LG20	3929175	+	19	0
HAVM41	LG20	3929185	+	19	0
HAVM41	LG20	18505626	+	1	2
HAVM41	LG20	18505637	+	1	2
HAVM41	LG20	18505654	+	0	3
HAVM41	LG20	18505680	+	0	2
HAVM41	LG20	18505688	+	1	2
HAVM41	LG20	18505698	+	0	3
HAVM41	LG20	18505732	+	1	2
HAVM41	LG20	18505747	+	1	2
HAVM41	LG20	18505791	+	0	3
HAVM41	LG20	18505797	+	0	3
HAVM41	LG20	18505890	+	0	3
HAVM41	LG20	18505904	+	1	2
HAVM41	LG20	18505945	+	1	2
HAVM41	LG20	18505959	+	1	2
HAVM41	LG20	18505990	+	1	2
HAVM41	LG11	6883140	+	0	5
HAVM41	LG11	6883152	+	0	5
HAVM41	LG11	6883161	+	0	5
HAVM41	LG11	6883172	+	0	5
HAVM41	LG11	6883193	+	0	5
HAVM41	LG11	6883202	+	0	5
HAVM41	LG11	6883233	+	0	5
HAVM41	LG11	6883245	+	0	5
HAVM41	LG11	6883250	+	0	5
HAVM41	LG11	6883257	+	0	5
HAVM41	LG11	6883265	+	0	5
HAVM41	LG11	6883276	+	0	5
HAVM41	LG11	6883322	+	0	5
HAVM41	LG11	6883325	+	4	1
HAVM41	LG1A	13290572	+	1	0
HAVM41	LG1A	13290625	+	0	1
HAVM41	LG1A	13290633	+	1	0
HAVM41	LG1A	13290645	+	0	1
HAVM41	LG1A	13290661	+	0	1
HAVM41	LG1A	13290674	+	1	0
HAVM41	LG1A	13290687	+	1	0
HAVM41	LG1A	13290877	+	1	0
HAVM41	LG1A	13290880	+	1	0
HAVM41	LG1A	13290910	+	1	0
HAVM41	LG1A	13290927	+	1	0
HAVM41	LG1A	20275424	-	143	2
HAVM41	LG1A	20275509	-	76	68
HAVM41	LG1A	20275623	-	66	77
HAVM41	LG2	10393124	-	6	0
HAVM41	LG2	10393134	-	6	0
HAVM41	LG2	10393152	-	1	5
HAVM41	LG2	10393170	-	0	6
HAVM41	LG2	10393189	-	0	6
HAVM41	LG2	10393191	-	0	6
HAVM41	LG2	10393198	-	0	6
HAVM41	LG2	10393211	-	0	6
HAVM41	LG2	10393219	-	0	6
HAVM41	LG2	10393225	-	0	6
HAVM41	LG2	10393231	-	0	6
HAVM41	LG2	10393240	-	0	6
HAVM41	LG2	10393252	-	0	6
HAVM41	LG2	10393254	-	0	6
HAVM41	LG2	10393323	-	0	6
HAVM41	LG2	10393364	-	0	6
HAVM41	LG2	10393371	-	0	6
HAVM41	LG2	10393373	-	0	6
HAVM41	LG2	10393404	-	0	6
HAVM41	LG2	10393441	-	0	6
HAVM41	LG2	10393444	-	0	6
HAVM41	LGx	14305960	-	0	2
HAVM41	LGx	14305966	-	0	2
HAVM41	LGx	14305973	-	0	2
HAVM41	LGx	14305981	-	0	2
HAVM41	LGx	14305987	-	0	2
HAVM41	LGx	14306034	-	0	2
HAVM41	LGx	14306037	-	0	2
HAVM41	LGx	14306044	-	0	2
HAVM41	LGx	14306048	-	0	2
HAVM41	LGx	14306056	-	0	2
HAVM41	LGx	14306062	-	0	2
HAVM41	LGx	14306070	-	0	2
HAVM41	LGx	14306082	-	0	2
HAVM41	LGx	14306103	-	0	2
HAVM41	LGx	14306107	-	0	2
HAVM41	LGx	14306125	-	0	2
HAVM41	LGx	14306134	-	0	2
HAVM41	LGx	14306148	-	0	2
HAVM41	LGx	14306170	-	0	2
HAVM41	LGx	14306219	-	0	2
HAVM41	LGx	14306273	-	1	1
HT1-11	LG1B	11628807	+	8952	1670
HT1-11	LG1B	11628870	+	8384	2246
HT1-11	LG1B	11628892	+	8343	2289
HT1-11	LG1B	11628926	+	10554	15
HT1-11	LG12	22701169	+	0	1
HT1-11	LG12	22701181	+	0	1
HT1-11	LG12	22701187	+	0	1
HT1-11	LG12	22701189	+	0	1
HT1-11	LG12	22701256	+	3039	156
HT1-11	LG12	22701264	+	3110	86
HT1-11	LG12	22701279	+	3067	128
HT1-11	LG12	22701428	+	3167	0
HT1-11	LG20	18505626	+	2	435
HT1-11	LG20	18505637	+	0	443
HT1-11	LG20	18505654	+	4	256
HT1-11	LG20	18505680	+	1	429
HT1-11	LG20	18505688	+	9	406
HT1-11	LG20	18505698	+	6	423
HT1-11	LG20	18505732	+	8	419
HT1-11	LG20	18505747	+	8	425
HT1-11	LG20	18505791	+	5	434
HT1-11	LG20	18505797	+	5	436
HT1-11	LG20	18505890	+	26	418
HT1-11	LG20	18505904	+	17	428
HT1-11	LG20	18505945	+	9	436
HT1-11	LG20	18505959	+	28	416
HT1-11	LG20	18505990	+	23	422
HT1-11	LG3	78269	+	2	0
HT1-11	LG3	78301	+	0	2
HT1-11	LG3	78312	+	0	2
HT1-11	LG3	78343	+	0	2
HT1-11	LG3	78394	+	0	2
HT1-11	LG3	78426	+	0	2
HT1-11	LG3	78429	+	0	2
HT1-11	LG3	78436	+	0	2
HT1-11	LG3	78447	+	0	2
HT1-11	LG3	78450	+	0	2
HT1-11	LG3	78460	+	0	2
HT1-11	LG3	78466	+	0	2
HT1-11	LG3	78511	+	0	2
HT1-11	LG3	78514	+	0	2
HT1-11	LG3	78570	+	0	2
HT1-11	LG3	78587	+	0	2
HT1-11	LG3	78590	+	0	2
HT1-11	LG3	78593	+	0	2
HT1-11	LG3	78596	+	0	2
HT1-11	LG3	78599	+	0	2
HT1-11	LG1A	20275424	-	19	0
HT1-11	LG1A	20275509	-	12	7
HT1-11	LG1A	20275623	-	5	14
HT1-11	LG2	10393124	-	4	0
HT1-11	LG2	10393134	-	4	0
HT1-11	LG2	10393152	-	0	4
HT1-11	LG2	10393170	-	0	4
HT1-11	LG2	10393189	-	0	4
HT1-11	LG2	10393191	-	0	4
HT1-11	LG2	10393198	-	0	4
HT1-11	LG2	10393211	-	0	4
HT1-11	LG2	10393219	-	0	4
HT1-11	LG2	10393225	-	0	4
HT1-11	LG2	10393231	-	0	4
HT1-11	LG2	10393240	-	0	4
HT1-11	LG2	10393252	-	0	4
HT1-11	LG2	10393254	-	0	4
HT1-11	LG2	10393323	-	0	4
HT1-11	LG2	10393364	-	0	4
HT1-11	LG2	10393371	-	0	4
HT1-11	LG2	10393373	-	0	4
HT1-11	LG2	10393404	-	0	4
HT1-11	LG2	10393441	-	0	4
HT1-11	LG2	10393444	-	0	4
HT1-14	LG12	22701187	+	0	2
HT1-14	LG12	22701189	+	0	1
HT1-14	LG12	22701256	+	126639	6370
HT1-14	LG12	22701264	+	126899	6091
HT1-14	LG12	22701279	+	125132	7855
HT1-14	LG12	22701428	+	131407	338
HT1-14	LG1B	1832030	-	4	0
HT1-14	LG1B	1832070	-	4	0
HT1-14	LG1B	1832162	-	4	0
HT1-14	LG1B	1832169	-	3	1
HT1-14	LG1B	1832177	-	4	0
HT1-14	LG1B	1832181	-	4	0
HT1-14	LG1B	1832227	-	4	0
HT1-14	LG1B	11628807	+	78279	9376
HT1-14	LG1B	11628870	+	74806	12963
HT1-14	LG1B	11628892	+	77167	10568
HT1-14	LG1B	11628926	+	86972	191
HT1-14	LG20	3929059	+	0	1
HT1-14	LG20	3929080	+	1	0
HT1-14	LG20	3929136	+	1	0
HT1-14	LG20	3929156	+	1	0
HT1-14	LG20	3929160	+	1	0
HT1-14	LG20	3929172	+	1	0
HT1-14	LG20	3929175	+	1	0
HT1-14	LG20	3929185	+	1	0
HT1-14	LG20	9089129	+	0	2
HT1-14	LG20	9089136	+	0	3
HT1-14	LG20	9089173	+	0	3
HT1-14	LG20	9089179	+	0	3
HT1-14	LG20	9089194	+	0	3
HT1-14	LG20	9089196	+	0	3
HT1-14	LG20	9089199	+	0	3
HT1-14	LG20	9089225	+	0	3
HT1-14	LG20	18505626	+	99	4055
HT1-14	LG20	18505637	+	35	4145
HT1-14	LG20	18505654	+	37	2158
HT1-14	LG20	18505680	+	65	3967
HT1-14	LG20	18505688	+	108	3813
HT1-14	LG20	18505698	+	56	3992
HT1-14	LG20	18505732	+	160	3897
HT1-14	LG20	18505747	+	242	3850
HT1-14	LG20	18505791	+	84	4040
HT1-14	LG20	18505797	+	129	4006
HT1-14	LG20	18505890	+	273	3910
HT1-14	LG20	18505904	+	396	3797
HT1-14	LG20	18505945	+	277	3910
HT1-14	LG20	18505959	+	426	3775
HT1-14	LG20	18505990	+	306	3901
HT1-14	LG20	18506044	+	2	0
HT1-14	LG9	13473437	+	3	0
HT1-14	UN	21780385	+	1	0
HT1-14	UN	21780404	+	1	0
HT1-14	UN	21780434	+	1	0
HT1-14	UN	21780461	+	1	0
HT1-14	UN	34177941	+	3	0
HT1-14	UN	34177984	+	3	0
HT1-14	UN	34177987	+	0	3
HT1-14	UN	34178038	+	0	3
HT1-14	UN	89940623	+	0	1
HT1-14	UN	89940646	+	0	1
HT1-14	UN	89940672	+	0	1
HT1-14	LG11	6883140	+	0	12
HT1-14	LG11	6883152	+	0	12
HT1-14	LG11	6883161	+	1	11
HT1-14	LG11	6883172	+	0	12
HT1-14	LG11	6883193	+	0	12
HT1-14	LG11	6883202	+	0	12
HT1-14	LG11	6883233	+	0	12
HT1-14	LG11	6883245	+	0	12
HT1-14	LG11	6883250	+	1	11
HT1-14	LG11	6883257	+	0	12
HT1-14	LG11	6883265	+	0	12
HT1-14	LG11	6883276	+	0	12
HT1-14	LG11	6883322	+	0	12
HT1-14	LG11	6883325	+	12	0
HT1-14	LG11	13651791	-	0	1
HT1-14	LG11	13651798	-	1	0
HT1-14	LG11	13651858	-	1	0
HT1-14	LG13	4691649	+	1	0
HT1-14	LG13	4691654	+	1	0
HT1-14	LG13	7386572	+	0	7
HT1-14	LG13	7386575	+	0	7
HT1-14	LG13	7386587	+	0	7
HT1-14	LG13	7386591	+	0	6
HT1-14	LG13	7386606	+	0	4
HT1-14	LG13	7386621	+	0	4
HT1-14	LG13	7386637	+	0	4
HT1-14	LG13	7386646	+	0	4
HT1-14	LG13	7386708	+	0	4
HT1-14	LG13	7386720	+	0	4
HT1-14	LG13	7386760	+	0	4
HT1-14	LG13	7386766	+	0	4
HT1-14	LG13	7386781	+	0	4
HT1-14	LG13	7386824	+	0	4
HT1-14	LG13	7386840	+	0	3
HT1-14	LG13	7386868	+	0	4
HT1-14	LG13	7386894	+	0	4
HT1-14	LG13	7386924	+	0	4
HT1-14	LG13	7386931	+	0	4
HT1-14	LG13	7386933	+	0	4
HT1-14	LG13	7386945	+	0	4
HT1-14	LG13	7386961	+	0	4
HT1-14	LG13	7386966	+	0	4
HT1-14	LG13	7386979	+	0	4
HT1-14	LG13	7386981	+	0	4
HT1-14	LG13	7386989	+	0	4
HT1-14	LG13	7386997	+	0	4
HT1-14	LG13	7386999	+	0	4
HT1-14	LG13	7387008	+	0	4
HT1-14	LG3	78269	+	4	0
HT1-14	LG3	78301	+	0	4
HT1-14	LG3	78312	+	0	4
HT1-14	LG3	78343	+	0	4
HT1-14	LG3	78394	+	0	4
HT1-14	LG3	78426	+	0	4
HT1-14	LG3	78429	+	0	4
HT1-14	LG3	78436	+	0	4
HT1-14	LG3	78447	+	0	4
HT1-14	LG3	78450	+	0	4
HT1-14	LG3	78460	+	0	4
HT1-14	LG3	78466	+	0	4
HT1-14	LG3	78511	+	0	4
HT1-14	LG3	78514	+	0	4
HT1-14	LG3	78570	+	0	4
HT1-14	LG3	78587	+	0	4
HT1-14	LG3	78590	+	0	4
HT1-14	LG3	78593	+	0	4
HT1-14	LG3	78596	+	0	4
HT1-14	LG3	78599	+	1	3
HT1-14	LG22-25	12484606	+	0	1
HT1-14	LG22-25	14602619	+	0	2
HT1-14	LG22-25	14602654	+	0	2
HT1-14	LG22-25	14602657	+	0	2
HT1-14	LG22-25	14602660	+	0	2
HT1-14	LG22-25	14602688	+	0	2
HT1-14	LG22-25	14602691	+	0	2
HT1-14	LG22-25	14602695	+	0	2
HT1-14	LG22-25	14602710	+	0	2
HT1-14	LG22-25	24752944	-	3	1
HT1-14	LG22-25	24753059	-	3	1
HT1-14	LGx	12552971	+	0	1
HT1-14	LGx	12552996	+	0	1
HT1-14	LGx	12553006	+	0	1
HT1-14	LGx	12553011	+	0	1
HT1-14	LGx	14305960	-	0	1
HT1-14	LGx	14305966	-	0	1
HT1-14	LGx	14305973	-	0	1
HT1-14	LGx	14305987	-	0	1
HT1-14	LGx	14306037	-	0	1
HT1-14	LGx	14306044	-	0	1
HT1-14	LGx	14306048	-	0	1
HT1-14	LGx	14306056	-	0	1
HT1-14	LGx	14306062	-	0	1
HT1-14	LGx	14306070	-	0	1
HT1-14	LGx	14306082	-	0	1
HT1-14	LGx	14306103	-	0	1
HT1-14	LGx	14306107	-	0	1
HT1-14	LGx	14306125	-	0	1
HT1-14	LGx	14306134	-	0	1
HT1-14	LGx	14306148	-	0	1
HT1-14	LGx	14306170	-	0	1
HT1-14	LGx	14306219	-	0	1
HT1-14	LGx	14306273	-	0	1
HT1-14	LG1A	20275424	-	83932	439
HT1-14	LG1A	20275509	-	55398	29550
HT1-14	LG1A	20275623	-	37756	47162
HT1-14	LG1A	20275718	-	0	3
HT1-14	LG5	6840623	-	146	90
HT1-14	LG2	10393124	-	3730	4
HT1-14	LG2	10393134	-	3723	3
HT1-14	LG2	10393152	-	6	3676
HT1-14	LG2	10393170	-	17	3667
HT1-14	LG2	10393189	-	9	3673
HT1-14	LG2	10393191	-	12	3672
HT1-14	LG2	10393198	-	17	3671
HT1-14	LG2	10393211	-	14	3672
HT1-14	LG2	10393219	-	6	3676
HT1-14	LG2	10393225	-	9	3565
HT1-14	LG2	10393231	-	42	3537
HT1-14	LG2	10393240	-	18	3555
HT1-14	LG2	10393252	-	7	3561
HT1-14	LG2	10393254	-	13	3553
HT1-14	LG2	10393323	-	9	3573
HT1-14	LG2	10393364	-	8	3559
HT1-14	LG2	10393371	-	8	3566
HT1-14	LG2	10393373	-	40	3532
HT1-14	LG2	10393404	-	16	3543
HT1-14	LG2	10393441	-	19	3552
HT1-14	LG2	10393444	-	3	3569
HT1-14	LG7	14749428	-	69	0
HT1-14	LG7	14749431	-	69	0
HT1-14	LG7	14749457	-	69	0
HT1-14	LG7	14749467	-	69	0
HT1-14	LG7	14749487	-	69	0
HT1-14	LG7	14749491	-	68	1
HT1-14	LG6	12004276	-	0	1
HT1-14	LG6	12004328	-	1	0
HT1-14	LG6	12004339	-	1	0
HT1-14	LG6	12004369	-	1	0
HT1-14	LG6	12004383	-	1	0
HT1-14	LG6	12004430	-	0	1
HT1-14	LG10	162812	-	0	3
HT1-14	LG10	162814	-	3	0
HT1-14	LG10	162817	-	0	3
HT1-14	LG10	162853	-	0	3
HT1-14	LG10	162859	-	0	3
HT1-14	LG10	22759382	-	36	1
HT1-14	LG10	22759490	-	37	0
HT1-14	LG10	22759513	-	37	0
HT1-14	LG10	22759540	-	0	37
HT1-18	LG12	22701256	+	4762	215
HT1-18	LG12	22701264	+	4737	237
HT1-18	LG12	22701279	+	4724	251
HT1-18	LG12	22701428	+	4919	13
HT1-18	LG1B	1832030	-	1	0
HT1-18	LG1B	1832070	-	1	0
HT1-18	LG1B	1832162	-	1	0
HT1-18	LG1B	1832169	-	1	0
HT1-18	LG1B	1832177	-	1	0
HT1-18	LG1B	1832181	-	1	0
HT1-18	LG1B	1832227	-	1	0
HT1-18	LG1B	11628807	+	8601	1963
HT1-18	LG1B	11628870	+	7886	2765
HT1-18	LG1B	11628892	+	8518	2129
HT1-18	LG1B	11628926	+	10589	14
HT1-18	LG20	18505626	+	10	77
HT1-18	LG20	18505637	+	3	85
HT1-18	LG20	18505654	+	1	18
HT1-18	LG20	18505680	+	2	81
HT1-18	LG20	18505688	+	9	74
HT1-18	LG20	18505698	+	2	78
HT1-18	LG20	18505732	+	23	64
HT1-18	LG20	18505747	+	28	58
HT1-18	LG20	18505791	+	12	75
HT1-18	LG20	18505797	+	27	59
HT1-18	LG20	18505890	+	38	50
HT1-18	LG20	18505904	+	37	51
HT1-18	LG20	18505945	+	33	55
HT1-18	LG20	18505959	+	53	35
HT1-18	LG20	18505990	+	42	46
HT1-18	LG1A	20275424	-	927	7
HT1-18	LG1A	20275509	-	847	95
HT1-18	LG1A	20275623	-	276	667
HT1-18	LG2	10393124	-	257	0
HT1-18	LG2	10393134	-	255	0
HT1-18	LG2	10393152	-	0	256
HT1-18	LG2	10393170	-	1	256
HT1-18	LG2	10393189	-	0	256
HT1-18	LG2	10393191	-	0	256
HT1-18	LG2	10393198	-	0	256
HT1-18	LG2	10393211	-	0	257
HT1-18	LG2	10393219	-	0	257
HT1-18	LG2	10393225	-	1	142
HT1-18	LG2	10393231	-	0	143
HT1-18	LG2	10393240	-	0	142
HT1-18	LG2	10393252	-	1	142
HT1-18	LG2	10393254	-	0	143
HT1-18	LG2	10393323	-	0	143
HT1-18	LG2	10393364	-	3	140
HT1-18	LG2	10393371	-	0	142
HT1-18	LG2	10393373	-	0	142
HT1-18	LG2	10393404	-	5	138
HT1-18	LG2	10393441	-	3	139
HT1-18	LG2	10393444	-	0	140
HT1-18	LG10	22759355	-	0	1
HT1-18	LG10	22759382	-	89	3
HT1-18	LG10	22759490	-	92	0
HT1-18	LG10	22759513	-	91	1
HT1-18	LG10	22759540	-	0	92
HT1-18	LGx	14305960	-	0	2
HT1-18	LGx	14305966	-	1	2
HT1-18	LGx	14305973	-	0	3
HT1-18	LGx	14305981	-	0	3
HT1-18	LGx	14305987	-	0	3
HT1-18	LGx	14306034	-	1	1
HT1-18	LGx	14306037	-	0	2
HT1-18	LGx	14306044	-	0	3
HT1-18	LGx	14306048	-	0	3
HT1-18	LGx	14306056	-	0	3
HT1-18	LGx	14306062	-	0	3
HT1-18	LGx	14306070	-	0	3
HT1-18	LGx	14306082	-	0	3
HT1-18	LGx	14306103	-	0	3
HT1-18	LGx	14306107	-	0	3
HT1-18	LGx	14306125	-	0	3
HT1-18	LGx	14306134	-	0	3
HT1-18	LGx	14306148	-	0	3
HT1-18	LGx	14306170	-	0	3
HT1-18	LGx	14306219	-	0	3
HT1-18	LGx	14306273	-	2	1
HT1-19	LG12	22701256	+	5578	190
HT1-19	LG12	22701264	+	5580	188
HT1-19	LG12	22701279	+	5446	325
HT1-19	LG12	22701428	+	5713	18
HT1-19	LG1B	11628807	+	11109	3437
HT1-19	LG1B	11628870	+	9851	4714
HT1-19	LG1B	11628892	+	11056	3509
HT1-19	LG1B	11628926	+	14457	23
HT1-19	LG20	18505626	+	37	739
HT1-19	LG20	18505637	+	10	764
HT1-19	LG20	18505654	+	15	487
HT1-19	LG20	18505680	+	32	721
HT1-19	LG20	18505688	+	56	677
HT1-19	LG20	18505698	+	16	731
HT1-19	LG20	18505732	+	62	682
HT1-19	LG20	18505747	+	59	704
HT1-19	LG20	18505791	+	43	725
HT1-19	LG20	18505797	+	49	721
HT1-19	LG20	18505890	+	96	679
HT1-19	LG20	18505904	+	168	607
HT1-19	LG20	18505945	+	136	639
HT1-19	LG20	18505959	+	194	582
HT1-19	LG20	18505990	+	110	666
HT1-19	LG11	6883140	+	0	2
HT1-19	LG11	6883152	+	0	2
HT1-19	LG11	6883161	+	0	2
HT1-19	LG11	6883172	+	0	2
HT1-19	LG11	6883193	+	0	2
HT1-19	LG11	6883202	+	0	2
HT1-19	LG11	6883233	+	0	2
HT1-19	LG11	6883245	+	0	2
HT1-19	LG11	6883250	+	0	2
HT1-19	LG11	6883257	+	0	2
HT1-19	LG11	6883265	+	1	1
HT1-19	LG11	6883276	+	0	2
HT1-19	LG11	6883322	+	0	2
HT1-19	LG11	6883325	+	2	0
HT1-19	LG14	19247055	+	0	1
HT1-19	LG14	19247106	+	1	0
HT1-19	LG14	19247132	+	1	0
HT1-19	LG14	19247161	+	0	1
HT1-19	LG1A	20275424	-	5019	31
HT1-19	LG1A	20275509	-	2976	2097
HT1-19	LG1A	20275623	-	1115	3953
HT1-19	LG2	10393124	-	984	0
HT1-19	LG2	10393134	-	982	0
HT1-19	LG2	10393152	-	0	984
HT1-19	LG2	10393170	-	6	979
HT1-19	LG2	10393189	-	1	980
HT1-19	LG2	10393191	-	2	978
HT1-19	LG2	10393198	-	4	979
HT1-19	LG2	10393211	-	3	980
HT1-19	LG2	10393219	-	5	978
HT1-19	LG2	10393225	-	2	979
HT1-19	LG2	10393231	-	6	976
HT1-19	LG2	10393240	-	2	979
HT1-19	LG2	10393252	-	5	978
HT1-19	LG2	10393254	-	3	982
HT1-19	LG2	10393323	-	3	981
HT1-19	LG2	10393364	-	3	977
HT1-19	LG2	10393371	-	2	978
HT1-19	LG2	10393373	-	4	978
HT1-19	LG2	10393404	-	0	986
HT1-19	LG2	10393441	-	6	974
HT1-19	LG2	10393444	-	2	981
HT1-19	LG5	6840623	-	3	0
HT1-21	LG12	22701256	+	1501	70
HT1-21	LG12	22701264	+	1501	69
HT1-21	LG12	22701279	+	1469	102
HT1-21	LG12	22701428	+	1553	5
HT1-21	LG1B	1832030	-	1	0
HT1-21	LG1B	1832070	-	1	0
HT1-21	LG1B	1832162	-	1	0
HT1-21	LG1B	1832169	-	0	1
HT1-21	LG1B	1832177	-	1	0
HT1-21	LG1B	1832181	-	1	0
HT1-21	LG1B	1832227	-	1	0
HT1-21	LG1B	11628807	+	3756	605
HT1-21	LG1B	11628870	+	3339	1027
HT1-21	LG1B	11628892	+	3666	698
HT1-21	LG1B	11628926	+	4335	5
HT1-21	LG20	18505626	+	36	373
HT1-21	LG20	18505637	+	12	400
HT1-21	LG20	18505654	+	11	245
HT1-21	LG20	18505680	+	30	377
HT1-21	LG20	18505688	+	50	344
HT1-21	LG20	18505698	+	25	379
HT1-21	LG20	18505732	+	71	332
HT1-21	LG20	18505747	+	92	314
HT1-21	LG20	18505791	+	42	369
HT1-21	LG20	18505797	+	58	355
HT1-21	LG20	18505890	+	95	318
HT1-21	LG20	18505904	+	115	299
HT1-21	LG20	18505945	+	105	309
HT1-21	LG20	18505959	+	144	269
HT1-21	LG20	18505990	+	113	301
HT1-21	LG11	6883140	+	0	1
HT1-21	LG11	6883152	+	0	1
HT1-21	LG11	6883161	+	1	0
HT1-21	LG11	6883172	+	0	1
HT1-21	LG11	6883193	+	0	1
HT1-21	LG11	6883202	+	0	1
HT1-21	LG11	6883233	+	0	1
HT1-21	LG11	6883245	+	0	1
HT1-21	LG11	6883250	+	0	1
HT1-21	LG11	6883257	+	0	1
HT1-21	LG11	6883265	+	0	1
HT1-21	LG11	6883276	+	0	1
HT1-21	LG11	6883322	+	0	1
HT1-21	LG11	6883325	+	1	0
HT1-21	LG1A	20275424	-	2683	17
HT1-21	LG1A	20275509	-	1690	1028
HT1-21	LG1A	20275623	-	881	1838
HT1-21	LG2	10393124	-	200	0
HT1-21	LG2	10393134	-	200	1
HT1-21	LG2	10393152	-	0	199
HT1-21	LG2	10393170	-	0	200
HT1-21	LG2	10393189	-	0	199
HT1-21	LG2	10393191	-	1	198
HT1-21	LG2	10393198	-	1	200
HT1-21	LG2	10393211	-	0	200
HT1-21	LG2	10393219	-	1	198
HT1-21	LG2	10393225	-	0	200
HT1-21	LG2	10393231	-	2	198
HT1-21	LG2	10393240	-	0	201
HT1-21	LG2	10393252	-	0	199
HT1-21	LG2	10393254	-	0	201
HT1-21	LG2	10393323	-	0	201
HT1-21	LG2	10393364	-	0	200
HT1-21	LG2	10393371	-	1	200
HT1-21	LG2	10393373	-	2	199
HT1-21	LG2	10393404	-	2	198
HT1-21	LG2	10393441	-	2	199
HT1-21	LG2	10393444	-	0	201
HT1-22	LG1B	11628807	+	11182	1755
HT1-22	LG1B	11628870	+	10361	2588
HT1-22	LG1B	11628892	+	10424	2521
HT1-22	LG1B	11628926	+	12862	25
HT1-22	LG12	22701256	+	5255	171
HT1-22	LG12	22701264	+	5228	196
HT1-22	LG12	22701279	+	5232	196
HT1-22	LG12	22701428	+	5359	14
HT1-22	LG20	18505626	+	0	61
HT1-22	LG20	18505637	+	0	61
HT1-22	LG20	18505654	+	1	34
HT1-22	LG20	18505680	+	5	56
HT1-22	LG20	18505688	+	1	59
HT1-22	LG20	18505698	+	1	56
HT1-22	LG20	18505732	+	8	51
HT1-22	LG20	18505747	+	14	45
HT1-22	LG20	18505791	+	4	55
HT1-22	LG20	18505797	+	5	55
HT1-22	LG20	18505890	+	18	41
HT1-22	LG20	18505904	+	21	39
HT1-22	LG20	18505945	+	20	40
HT1-22	LG20	18505959	+	29	31
HT1-22	LG20	18505990	+	20	40
HT1-22	LG1A	20275424	-	3927	27
HT1-22	LG1A	20275509	-	2183	1791
HT1-22	LG1A	20275623	-	1605	2366
HT1-22	LG2	10393124	-	251	0
HT1-22	LG2	10393134	-	248	0
HT1-22	LG2	10393152	-	0	251
HT1-22	LG2	10393170	-	1	250
HT1-22	LG2	10393189	-	5	246
HT1-22	LG2	10393191	-	0	251
HT1-22	LG2	10393198	-	0	251
HT1-22	LG2	10393211	-	0	250
HT1-22	LG2	10393219	-	0	248
HT1-22	LG2	10393225	-	13	235
HT1-22	LG2	10393231	-	0	247
HT1-22	LG2	10393240	-	0	247
HT1-22	LG2	10393252	-	2	248
HT1-22	LG2	10393254	-	0	248
HT1-22	LG2	10393323	-	0	249
HT1-22	LG2	10393364	-	11	238
HT1-22	LG2	10393371	-	1	247
HT1-22	LG2	10393373	-	1	247
HT1-22	LG2	10393404	-	0	249
HT1-22	LG2	10393441	-	0	250
HT1-22	LG2	10393444	-	1	249
HT1-24	LG1B	11628807	+	24034	3335
HT1-24	LG1B	11628870	+	22369	5024
HT1-24	LG1B	11628892	+	24828	2567
HT1-24	LG1B	11628926	+	27201	38
HT1-24	LG12	22701256	+	2738	466
HT1-24	LG12	22701264	+	2775	432
HT1-24	LG12	22701279	+	2690	518
HT1-24	LG12	22701428	+	3165	20
HT1-24	LG20	18505626	+	129	848
HT1-24	LG20	18505637	+	34	943
HT1-24	LG20	18505654	+	36	593
HT1-24	LG20	18505680	+	158	798
HT1-24	LG20	18505688	+	176	757
HT1-24	LG20	18505698	+	110	843
HT1-24	LG20	18505732	+	293	656
HT1-24	LG20	18505747	+	378	585
HT1-24	LG20	18505791	+	167	800
HT1-24	LG20	18505797	+	231	738
HT1-24	LG20	18505890	+	514	465
HT1-24	LG20	18505904	+	629	353
HT1-24	LG20	18505945	+	392	590
HT1-24	LG20	18505959	+	563	417
HT1-24	LG20	18505990	+	467	515
HT1-24	LG11	6883140	+	0	2
HT1-24	LG11	6883152	+	0	2
HT1-24	LG11	6883161	+	0	2
HT1-24	LG11	6883172	+	0	2
HT1-24	LG11	6883193	+	0	2
HT1-24	LG11	6883202	+	0	2
HT1-24	LG11	6883233	+	0	2
HT1-24	LG11	6883245	+	0	2
HT1-24	LG11	6883250	+	0	2
HT1-24	LG11	6883257	+	0	2
HT1-24	LG11	6883265	+	0	2
HT1-24	LG11	6883276	+	0	2
HT1-24	LG11	6883322	+	0	2
HT1-24	LG11	6883325	+	2	0
HT1-24	LG1A	20275424	-	8035	43
HT1-24	LG1A	20275509	-	6084	2073
HT1-24	LG1A	20275623	-	4489	3663
HT1-24	LG2	10393124	-	180	0
HT1-24	LG2	10393134	-	180	0
HT1-24	LG2	10393152	-	0	180
HT1-24	LG2	10393170	-	0	180
HT1-24	LG2	10393189	-	1	179
HT1-24	LG2	10393191	-	1	179
HT1-24	LG2	10393198	-	2	178
HT1-24	LG2	10393211	-	1	178
HT1-24	LG2	10393219	-	1	178
HT1-24	LG2	10393225	-	1	179
HT1-24	LG2	10393231	-	2	177
HT1-24	LG2	10393240	-	0	180
HT1-24	LG2	10393252	-	0	180
HT1-24	LG2	10393254	-	0	180
HT1-24	LG2	10393323	-	0	180
HT1-24	LG2	10393364	-	0	180
HT1-24	LG2	10393371	-	1	178
HT1-24	LG2	10393373	-	1	179
HT1-24	LG2	10393404	-	1	179
HT1-24	LG2	10393441	-	0	178
HT1-24	LG2	10393444	-	0	180
HT1-24	LG5	6840623	-	11	0
HT1-26	LG1B	11628807	+	16524	1910
HT1-26	LG1B	11628870	+	15148	3310
HT1-26	LG1B	11628892	+	15615	2830
HT1-26	LG1B	11628926	+	18302	27
HT1-26	LG12	22701256	+	4201	135
HT1-26	LG12	22701264	+	4232	104
HT1-26	LG12	22701279	+	4128	205
HT1-26	LG12	22701428	+	4288	9
HT1-26	LG20	18505626	+	19	400
HT1-26	LG20	18505637	+	7	413
HT1-26	LG20	18505654	+	4	233
HT1-26	LG20	18505680	+	11	395
HT1-26	LG20	18505688	+	31	371
HT1-26	LG20	18505698	+	10	403
HT1-26	LG20	18505732	+	30	381
HT1-26	LG20	18505747	+	39	371
HT1-26	LG20	18505791	+	15	396
HT1-26	LG20	18505797	+	21	396
HT1-26	LG20	18505890	+	50	378
HT1-26	LG20	18505904	+	68	361
HT1-26	LG20	18505945	+	47	382
HT1-26	LG20	18505959	+	63	366
HT1-26	LG20	18505990	+	57	371
HT1-26	LG3	78269	+	2	0
HT1-26	LG3	78301	+	0	2
HT1-26	LG3	78312	+	0	2
HT1-26	LG3	78343	+	0	2
HT1-26	LG3	78394	+	0	2
HT1-26	LG3	78426	+	0	2
HT1-26	LG3	78429	+	0	2
HT1-26	LG3	78436	+	1	1
HT1-26	LG3	78447	+	0	2
HT1-26	LG3	78450	+	0	2
HT1-26	LG3	78460	+	0	2
HT1-26	LG3	78466	+	0	2
HT1-26	LG3	78511	+	0	2
HT1-26	LG3	78514	+	0	1
HT1-26	LG3	78570	+	0	2
HT1-26	LG3	78587	+	0	2
HT1-26	LG3	78590	+	0	2
HT1-26	LG3	78593	+	0	2
HT1-26	LG3	78596	+	0	2
HT1-26	LG3	78599	+	0	2
HT1-26	LG11	6883140	+	0	1
HT1-26	LG11	6883152	+	0	1
HT1-26	LG11	6883161	+	0	1
HT1-26	LG11	6883172	+	0	1
HT1-26	LG11	6883193	+	0	1
HT1-26	LG11	6883202	+	0	1
HT1-26	LG11	6883233	+	0	1
HT1-26	LG11	6883245	+	0	1
HT1-26	LG11	6883250	+	0	1
HT1-26	LG11	6883257	+	0	1
HT1-26	LG11	6883265	+	0	1
HT1-26	LG11	6883276	+	1	0
HT1-26	LG11	6883322	+	0	1
HT1-26	LG11	6883325	+	1	0
HT1-26	LG1A	20275424	-	4329	20
HT1-26	LG1A	20275509	-	2532	1856
HT1-26	LG1A	20275623	-	1583	2808
HT1-26	LG2	10393124	-	569	1
HT1-26	LG2	10393134	-	568	0
HT1-26	LG2	10393152	-	1	569
HT1-26	LG2	10393170	-	1	569
HT1-26	LG2	10393189	-	0	569
HT1-26	LG2	10393191	-	1	568
HT1-26	LG2	10393198	-	2	568
HT1-26	LG2	10393211	-	3	566
HT1-26	LG2	10393219	-	0	566
HT1-26	LG2	10393225	-	1	565
HT1-26	LG2	10393231	-	0	567
HT1-26	LG2	10393240	-	1	568
HT1-26	LG2	10393252	-	0	567
HT1-26	LG2	10393254	-	1	566
HT1-26	LG2	10393323	-	1	569
HT1-26	LG2	10393364	-	2	566
HT1-26	LG2	10393371	-	0	569
HT1-26	LG2	10393373	-	2	566
HT1-26	LG2	10393404	-	0	568
HT1-26	LG2	10393441	-	0	570
HT1-26	LG2	10393444	-	2	566
HT1-28	LG12	22701256	+	6532	216
HT1-28	LG12	22701264	+	6544	202
HT1-28	LG12	22701279	+	6436	310
HT1-28	LG12	22701428	+	6672	19
HT1-28	LG1B	1832030	-	1	0
HT1-28	LG1B	1832070	-	1	0
HT1-28	LG1B	1832162	-	1	0
HT1-28	LG1B	1832169	-	1	0
HT1-28	LG1B	1832177	-	1	0
HT1-28	LG1B	1832181	-	1	0
HT1-28	LG1B	1832227	-	1	0
HT1-28	LG1B	11628807	+	32	8
HT1-28	LG1B	11628870	+	29	11
HT1-28	LG1B	11628892	+	29	10
HT1-28	LG1B	11628926	+	40	0
HT1-28	LG20	18505626	+	0	9
HT1-28	LG20	18505637	+	0	10
HT1-28	LG20	18505654	+	0	5
HT1-28	LG20	18505680	+	0	8
HT1-28	LG20	18505688	+	0	7
HT1-28	LG20	18505698	+	0	9
HT1-28	LG20	18505732	+	1	9
HT1-28	LG20	18505747	+	2	8
HT1-28	LG20	18505791	+	0	10
HT1-28	LG20	18505797	+	1	9
HT1-28	LG20	18505890	+	3	7
HT1-28	LG20	18505904	+	4	6
HT1-28	LG20	18505945	+	5	5
HT1-28	LG20	18505959	+	4	6
HT1-28	LG20	18505990	+	2	8
HT1-28	LG11	6883140	+	0	1
HT1-28	LG11	6883152	+	0	1
HT1-28	LG11	6883161	+	0	1
HT1-28	LG11	6883172	+	0	1
HT1-28	LG11	6883193	+	0	1
HT1-28	LG11	6883202	+	0	1
HT1-28	LG11	6883233	+	0	1
HT1-28	LG11	6883245	+	0	1
HT1-28	LG11	6883250	+	0	1
HT1-28	LG11	6883257	+	0	1
HT1-28	LG11	6883265	+	0	1
HT1-28	LG11	6883276	+	0	1
HT1-28	LG11	6883322	+	0	1
HT1-28	LG11	6883325	+	1	0
HT1-28	LG3	78269	+	1	0
HT1-28	LG3	78301	+	0	1
HT1-28	LG3	78312	+	0	1
HT1-28	LG3	78343	+	0	1
HT1-28	LG3	78394	+	0	1
HT1-28	LG3	78426	+	0	1
HT1-28	LG3	78429	+	1	0
HT1-28	LG3	78436	+	0	1
HT1-28	LG3	78447	+	0	1
HT1-28	LG3	78450	+	0	1
HT1-28	LG3	78460	+	0	1
HT1-28	LG3	78466	+	1	0
HT1-28	LG3	78511	+	0	1
HT1-28	LG3	78514	+	0	1
HT1-28	LG3	78570	+	0	1
HT1-28	LG3	78587	+	0	1
HT1-28	LG3	78590	+	0	1
HT1-28	LG3	78593	+	0	1
HT1-28	LG3	78596	+	0	1
HT1-28	LG3	78599	+	0	1
HT1-28	LG1A	20275424	-	6044	39
HT1-28	LG1A	20275509	-	3390	2722
HT1-28	LG1A	20275623	-	1471	4637
HT1-28	LG2	10393124	-	272	0
HT1-28	LG2	10393134	-	271	0
HT1-28	LG2	10393152	-	0	272
HT1-28	LG2	10393170	-	2	270
HT1-28	LG2	10393189	-	2	271
HT1-28	LG2	10393191	-	3	270
HT1-28	LG2	10393198	-	1	271
HT1-28	LG2	10393211	-	2	271
HT1-28	LG2	10393219	-	1	269
HT1-28	LG2	10393225	-	0	273
HT1-28	LG2	10393231	-	0	272
HT1-28	LG2	10393240	-	1	272
HT1-28	LG2	10393252	-	1	272
HT1-28	LG2	10393254	-	3	269
HT1-28	LG2	10393323	-	2	271
HT1-28	LG2	10393364	-	4	267
HT1-28	LG2	10393371	-	0	269
HT1-28	LG2	10393373	-	3	268
HT1-28	LG2	10393404	-	0	273
HT1-28	LG2	10393441	-	0	273
HT1-28	LG2	10393444	-	0	272
HT1-28	UN	23144232	-	14	0
HT1-28	LG10	22759382	-	0	1
HT1-28	LG10	22759490	-	1	0
HT1-28	LG10	22759513	-	1	0
HT1-28	LG10	22759540	-	0	1
HT1-29	LG1B	11628807	+	10220	3781
HT1-29	LG1B	11628870	+	8280	5740
HT1-29	LG1B	11628892	+	9156	4857
HT1-29	LG1B	11628926	+	13908	18
HT1-29	LG12	10174368	-	0	1
HT1-29	LG12	22701256	+	2983	111
HT1-29	LG12	22701264	+	2994	98
HT1-29	LG12	22701279	+	2928	164
HT1-29	LG12	22701428	+	3047	7
HT1-29	LG20	9089129	+	0	7
HT1-29	LG20	9089136	+	0	7
HT1-29	LG20	9089173	+	0	7
HT1-29	LG20	9089179	+	0	7
HT1-29	LG20	9089194	+	0	7
HT1-29	LG20	9089196	+	0	7
HT1-29	LG20	9089199	+	0	7
HT1-29	LG20	9089225	+	0	7
HT1-29	LG20	18505626	+	28	368
HT1-29	LG20	18505637	+	2	395
HT1-29	LG20	18505654	+	12	271
HT1-29	LG20	18505680	+	18	367
HT1-29	LG20	18505688	+	44	335
HT1-29	LG20	18505698	+	14	374
HT1-29	LG20	18505732	+	34	357
HT1-29	LG20	18505747	+	42	350
HT1-29	LG20	18505791	+	21	370
HT1-29	LG20	18505797	+	19	372
HT1-29	LG20	18505890	+	84	310
HT1-29	LG20	18505904	+	76	319
HT1-29	LG20	18505945	+	74	323
HT1-29	LG20	18505959	+	90	308
HT1-29	LG20	18505990	+	78	320
HT1-29	LG16	6478256	+	2	0
HT1-29	LG16	6478289	+	2	0
HT1-29	LG16	6478325	+	1	1
HT1-29	LG16	6478327	+	2	0
HT1-29	LG16	6478385	+	2	0
HT1-29	LG16	6478555	+	1	1
HT1-29	LG5	12334183	+	2	0
HT1-29	LG5	12334197	+	2	0
HT1-29	LG19	11517163	+	0	1
HT1-29	LG19	11517208	+	0	1
HT1-29	LG19	11517224	+	0	1
HT1-29	LG19	11517253	+	0	1
HT1-29	LG19	11517298	+	0	1
HT1-29	LG14	25618231	+	1	1
HT1-29	LG14	25618275	+	2	0
HT1-29	LG14	25618374	+	2	0
HT1-29	LG14	25618387	+	2	0
HT1-29	LG14	25618566	+	1	1
HT1-29	LG14	25618600	+	0	2
HT1-29	LG14	25618604	+	0	2
HT1-29	UN	46398650	-	0	1
HT1-29	UN	46398655	-	0	1
HT1-29	UN	46398661	-	0	1
HT1-29	UN	46398706	-	0	1
HT1-29	UN	46398717	-	0	1
HT1-29	UN	46398725	-	0	1
HT1-29	UN	46398728	-	0	1
HT1-29	UN	46398784	-	0	1
HT1-29	UN	65654316	+	1	0
HT1-29	UN	65654323	+	1	0
HT1-29	UN	65654327	+	1	0
HT1-29	UN	65654334	+	1	0
HT1-29	UN	65654342	+	1	0
HT1-29	UN	65654347	+	1	0
HT1-29	UN	65654365	+	1	0
HT1-29	UN	65654376	+	1	0
HT1-29	UN	65654398	+	1	0
HT1-29	UN	65654427	+	1	0
HT1-29	UN	65654497	+	1	0
HT1-29	UN	65654522	+	1	0
HT1-29	UN	65654529	+	1	0
HT1-29	UN	65654541	+	1	0
HT1-29	UN	65654548	+	1	0
HT1-29	LG2	10393124	-	258	0
HT1-29	LG2	10393134	-	260	1
HT1-29	LG2	10393152	-	0	262
HT1-29	LG2	10393170	-	0	262
HT1-29	LG2	10393189	-	0	262
HT1-29	LG2	10393191	-	1	260
HT1-29	LG2	10393198	-	0	262
HT1-29	LG2	10393211	-	2	260
HT1-29	LG2	10393219	-	1	260
HT1-29	LG2	10393225	-	2	259
HT1-29	LG2	10393231	-	0	261
HT1-29	LG2	10393240	-	0	259
HT1-29	LG2	10393252	-	0	261
HT1-29	LG2	10393254	-	0	261
HT1-29	LG2	10393323	-	0	260
HT1-29	LG2	10393364	-	3	257
HT1-29	LG2	10393371	-	2	256
HT1-29	LG2	10393373	-	0	260
HT1-29	LG2	10393404	-	0	260
HT1-29	LG2	10393441	-	5	256
HT1-29	LG2	10393444	-	0	260
HT1-29	LG1A	3522237	-	12	0
HT1-29	LG1A	3522259	-	12	0
HT1-29	LG1A	3522266	-	11	1
HT1-29	LG1A	3522291	-	12	0
HT1-29	LG1A	3522303	-	12	0
HT1-29	LG1A	20275424	-	10	0
HT1-29	LG1A	20275509	-	5	5
HT1-29	LG1A	20275623	-	3	7
HT1-29	LG22-25	24752944	-	14	6
HT1-29	LG22-25	24753059	-	18	2
HT1-29	LG8	21910123	-	2	0
HT1-29	LG8	21910132	-	1	1
HT1-29	LGx	16324562	-	1	0
HT1-29	LGx	16324565	-	1	0
HT1-29	LGx	16324571	-	1	0
HT1-29	LGx	16324595	-	1	0
HT1-29	LGx	16324610	-	1	0
HT1-29	LGx	16324647	-	0	1
HT1-2	LG1B	11628807	+	9736	3306
HT1-2	LG1B	11628870	+	9059	3994
HT1-2	LG1B	11628892	+	9111	3940
HT1-2	LG1B	11628926	+	12952	24
HT1-2	LG12	22701256	+	4046	203
HT1-2	LG12	22701264	+	4060	188
HT1-2	LG12	22701279	+	3979	271
HT1-2	LG12	22701428	+	4205	6
HT1-2	LG20	18505626	+	3	49
HT1-2	LG20	18505637	+	0	51
HT1-2	LG20	18505654	+	0	15
HT1-2	LG20	18505680	+	0	49
HT1-2	LG20	18505688	+	7	43
HT1-2	LG20	18505698	+	1	50
HT1-2	LG20	18505732	+	4	47
HT1-2	LG20	18505747	+	10	41
HT1-2	LG20	18505791	+	1	50
HT1-2	LG20	18505797	+	12	40
HT1-2	LG20	18505890	+	14	37
HT1-2	LG20	18505904	+	25	27
HT1-2	LG20	18505945	+	15	36
HT1-2	LG20	18505959	+	27	25
HT1-2	LG20	18505990	+	15	37
HT1-2	LG9	4930031	+	1	0
HT1-2	LG1A	822231	+	1	0
HT1-2	LG1A	20275424	-	1039	7
HT1-2	LG1A	20275509	-	829	224
HT1-2	LG1A	20275623	-	470	580
HT1-2	LG11	6883140	+	0	1
HT1-2	LG11	6883152	+	0	1
HT1-2	LG11	6883161	+	0	1
HT1-2	LG11	6883172	+	0	1
HT1-2	LG11	6883193	+	0	1
HT1-2	LG11	6883202	+	0	1
HT1-2	LG11	6883233	+	0	1
HT1-2	LG11	6883245	+	0	1
HT1-2	LG11	6883250	+	0	1
HT1-2	LG11	6883257	+	0	1
HT1-2	LG11	6883265	+	0	1
HT1-2	LG11	6883276	+	0	1
HT1-2	LG11	6883322	+	0	1
HT1-2	LG11	6883325	+	1	0
HT1-2	LG3	78269	+	1	0
HT1-2	LG3	78301	+	0	1
HT1-2	LG3	78312	+	0	1
HT1-2	LG3	78343	+	0	1
HT1-2	LG3	78394	+	0	1
HT1-2	LG3	78426	+	0	1
HT1-2	LG3	78429	+	0	1
HT1-2	LG3	78436	+	0	1
HT1-2	LG3	78447	+	0	1
HT1-2	LG3	78450	+	1	0
HT1-2	LG3	78460	+	0	1
HT1-2	LG3	78466	+	1	0
HT1-2	LG3	78511	+	0	1
HT1-2	LG3	78514	+	0	1
HT1-2	LG3	78570	+	0	1
HT1-2	LG3	78587	+	0	1
HT1-2	LG3	78590	+	0	1
HT1-2	LG3	78593	+	0	1
HT1-2	LG3	78596	+	1	0
HT1-2	LG3	78599	+	0	1
HT1-30	LG12	10174368	-	0	1
HT1-30	LG12	22701169	+	0	1
HT1-30	LG12	22701181	+	0	1
HT1-30	LG12	22701187	+	0	3
HT1-30	LG12	22701189	+	0	1
HT1-30	LG12	22701256	+	87366	3707
HT1-30	LG12	22701264	+	87872	3200
HT1-30	LG12	22701279	+	86747	4352
HT1-30	LG12	22701428	+	90123	190
HT1-30	LG1B	11628807	+	52484	5001
HT1-30	LG1B	11628870	+	49962	7605
HT1-30	LG1B	11628892	+	51255	6280
HT1-30	LG1B	11628926	+	57040	154
HT1-30	LG20	18505626	+	83	3809
HT1-30	LG20	18505637	+	38	3868
HT1-30	LG20	18505654	+	42	2316
HT1-30	LG20	18505680	+	69	3696
HT1-30	LG20	18505688	+	98	3602
HT1-30	LG20	18505698	+	71	3714
HT1-30	LG20	18505732	+	151	3656
HT1-30	LG20	18505747	+	193	3649
HT1-30	LG20	18505791	+	100	3760
HT1-30	LG20	18505797	+	93	3786
HT1-30	LG20	18505890	+	192	3708
HT1-30	LG20	18505904	+	333	3582
HT1-30	LG20	18505945	+	193	3714
HT1-30	LG20	18505959	+	351	3564
HT1-30	LG20	18505990	+	219	3705
HT1-30	LG20	18506044	+	1	0
HT1-30	LG16	6478256	+	1	0
HT1-30	LG16	6478289	+	1	0
HT1-30	LG16	6478325	+	1	0
HT1-30	LG16	6478327	+	1	0
HT1-30	LG16	6478385	+	1	0
HT1-30	LG16	6478555	+	0	1
HT1-30	LG16	11886902	-	0	1
HT1-30	LG11	6883140	+	0	2
HT1-30	LG11	6883152	+	0	2
HT1-30	LG11	6883161	+	0	2
HT1-30	LG11	6883172	+	0	2
HT1-30	LG11	6883193	+	0	2
HT1-30	LG11	6883202	+	0	2
HT1-30	LG11	6883233	+	0	2
HT1-30	LG11	6883245	+	0	2
HT1-30	LG11	6883250	+	0	2
HT1-30	LG11	6883257	+	0	2
HT1-30	LG11	6883265	+	0	2
HT1-30	LG11	6883276	+	0	2
HT1-30	LG11	6883322	+	0	2
HT1-30	LG11	6883325	+	2	0
HT1-30	LG13	7386572	+	0	1
HT1-30	LG13	7386575	+	0	1
HT1-30	LG13	7386587	+	0	1
HT1-30	LG13	7386591	+	0	1
HT1-30	LG13	7386606	+	0	1
HT1-30	LG13	7386621	+	0	1
HT1-30	LG13	7386637	+	0	1
HT1-30	LG13	7386646	+	0	1
HT1-30	LG13	7386708	+	0	1
HT1-30	LG13	7386720	+	0	1
HT1-30	LG13	7386760	+	0	1
HT1-30	LG13	7386766	+	0	1
HT1-30	LG13	7386781	+	0	1
HT1-30	LG13	7386824	+	0	1
HT1-30	LG13	7386840	+	0	1
HT1-30	LG13	7386868	+	0	1
HT1-30	LG13	7386894	+	0	1
HT1-30	LG13	7386924	+	0	1
HT1-30	LG13	7386931	+	0	1
HT1-30	LG13	7386933	+	0	1
HT1-30	LG13	7386945	+	0	1
HT1-30	LG13	7386961	+	0	1
HT1-30	LG13	7386966	+	1	0
HT1-30	LG13	7386979	+	0	1
HT1-30	LG13	7386981	+	0	1
HT1-30	LG13	7386989	+	0	1
HT1-30	LG13	7386997	+	0	1
HT1-30	LG13	7386999	+	0	1
HT1-30	LG13	7387008	+	0	1
HT1-30	LG9	4930031	+	1	0
HT1-30	LG1A	3522237	-	1	0
HT1-30	LG1A	3522259	-	1	0
HT1-30	LG1A	3522266	-	1	0
HT1-30	LG1A	3522291	-	1	0
HT1-30	LG1A	3522303	-	1	0
HT1-30	LG1A	20275424	-	39798	233
HT1-30	LG1A	20275509	-	30237	10087
HT1-30	LG1A	20275623	-	24496	15873
HT1-30	LG1A	20275718	-	0	1
HT1-30	LG2	10393124	-	6465	4
HT1-30	LG2	10393134	-	6458	4
HT1-30	LG2	10393152	-	16	6456
HT1-30	LG2	10393170	-	15	6460
HT1-30	LG2	10393189	-	48	6422
HT1-30	LG2	10393191	-	30	6423
HT1-30	LG2	10393198	-	20	6458
HT1-30	LG2	10393211	-	11	6460
HT1-30	LG2	10393219	-	20	6438
HT1-30	LG2	10393225	-	16	6445
HT1-30	LG2	10393231	-	35	6420
HT1-30	LG2	10393240	-	62	6392
HT1-30	LG2	10393252	-	17	6434
HT1-30	LG2	10393254	-	40	6406
HT1-30	LG2	10393323	-	18	6454
HT1-30	LG2	10393364	-	11	6444
HT1-30	LG2	10393371	-	24	6432
HT1-30	LG2	10393373	-	28	6420
HT1-30	LG2	10393404	-	18	6473
HT1-30	LG2	10393441	-	25	6452
HT1-30	LG2	10393444	-	35	6449
HT1-30	LG5	6840623	-	23	60
HT1-30	LG10	162812	-	0	5
HT1-30	LG10	162814	-	0	5
HT1-30	LG10	162817	-	0	5
HT1-30	LG10	162853	-	0	5
HT1-30	LG10	162859	-	0	5
HT1-30	LG22-25	24752944	-	3	0
HT1-30	LG22-25	24753059	-	3	0
HT1-30	UN	77737497	-	1	0
HT1-30	UN	77737527	-	1	0
HT1-30	UN	77737546	-	1	0
HT1-3	LG12	22701256	+	1583	101
HT1-3	LG12	22701264	+	1606	78
HT1-3	LG12	22701279	+	1601	83
HT1-3	LG12	22701428	+	1667	6
HT1-3	LG1B	11628807	+	2979	772
HT1-3	LG1B	11628870	+	2939	809
HT1-3	LG1B	11628892	+	2973	788
HT1-3	LG1B	11628926	+	3735	2
HT1-3	LG20	18505626	+	1	7
HT1-3	LG20	18505637	+	0	8
HT1-3	LG20	18505654	+	0	2
HT1-3	LG20	18505680	+	0	7
HT1-3	LG20	18505688	+	0	7
HT1-3	LG20	18505698	+	0	7
HT1-3	LG20	18505732	+	0	8
HT1-3	LG20	18505747	+	1	7
HT1-3	LG20	18505791	+	0	8
HT1-3	LG20	18505797	+	0	8
HT1-3	LG20	18505890	+	1	7
HT1-3	LG20	18505904	+	1	7
HT1-3	LG20	18505945	+	0	8
HT1-3	LG20	18505959	+	4	4
HT1-3	LG20	18505990	+	1	7
HT1-3	LG11	6883140	+	0	1
HT1-3	LG11	6883152	+	0	1
HT1-3	LG11	6883161	+	0	1
HT1-3	LG11	6883172	+	0	1
HT1-3	LG11	6883193	+	0	1
HT1-3	LG11	6883202	+	0	1
HT1-3	LG11	6883233	+	0	1
HT1-3	LG11	6883245	+	0	1
HT1-3	LG11	6883250	+	0	1
HT1-3	LG11	6883257	+	0	1
HT1-3	LG11	6883265	+	0	1
HT1-3	LG11	6883276	+	0	1
HT1-3	LG11	6883322	+	0	1
HT1-3	LG11	6883325	+	1	0
HT1-3	LG1A	20275424	-	831	5
HT1-3	LG1A	20275509	-	458	383
HT1-3	LG1A	20275623	-	286	555
HT1-3	LG2	10393124	-	2	0
HT1-3	LG2	10393134	-	2	0
HT1-3	LG2	10393152	-	0	2
HT1-3	LG2	10393170	-	0	2
HT1-3	LG2	10393189	-	0	2
HT1-3	LG2	10393191	-	0	2
HT1-3	LG2	10393198	-	0	2
HT1-3	LG2	10393211	-	0	2
HT1-3	LG2	10393219	-	0	2
HT1-3	LG2	10393225	-	0	2
HT1-3	LG2	10393231	-	0	2
HT1-3	LG2	10393240	-	0	2
HT1-3	LG2	10393252	-	0	2
HT1-3	LG2	10393254	-	0	2
HT1-3	LG2	10393323	-	0	2
HT1-3	LG2	10393364	-	0	2
HT1-3	LG2	10393371	-	0	2
HT1-3	LG2	10393373	-	0	2
HT1-3	LG2	10393404	-	0	2
HT1-3	LG2	10393441	-	0	2
HT1-3	LG2	10393444	-	0	2
HT1-7	LG12	22701256	+	5517	297
HT1-7	LG12	22701264	+	5549	263
HT1-7	LG12	22701279	+	5570	242
HT1-7	LG12	22701428	+	5741	11
HT1-7	LG1B	11628807	+	5999	1095
HT1-7	LG1B	11628870	+	5781	1331
HT1-7	LG1B	11628892	+	6055	1058
HT1-7	LG1B	11628926	+	7055	10
HT1-7	LG20	18505626	+	0	46
HT1-7	LG20	18505637	+	0	46
HT1-7	LG20	18505654	+	0	35
HT1-7	LG20	18505680	+	1	44
HT1-7	LG20	18505688	+	2	41
HT1-7	LG20	18505698	+	11	33
HT1-7	LG20	18505732	+	2	42
HT1-7	LG20	18505747	+	2	42
HT1-7	LG20	18505791	+	2	44
HT1-7	LG20	18505797	+	3	43
HT1-7	LG20	18505890	+	18	28
HT1-7	LG20	18505904	+	21	25
HT1-7	LG20	18505945	+	7	39
HT1-7	LG20	18505959	+	19	27
HT1-7	LG20	18505990	+	6	40
HT1-7	LG13	4691649	+	1	0
HT1-7	LG13	4691654	+	1	0
HT1-7	LG11	6883140	+	0	4
HT1-7	LG11	6883152	+	0	4
HT1-7	LG11	6883161	+	0	4
HT1-7	LG11	6883172	+	0	4
HT1-7	LG11	6883193	+	0	4
HT1-7	LG11	6883202	+	0	4
HT1-7	LG11	6883233	+	0	4
HT1-7	LG11	6883245	+	0	4
HT1-7	LG11	6883250	+	0	4
HT1-7	LG11	6883257	+	0	4
HT1-7	LG11	6883265	+	0	3
HT1-7	LG11	6883276	+	0	4
HT1-7	LG11	6883322	+	0	4
HT1-7	LG11	6883325	+	4	0
HT1-7	LG3	78269	+	3	0
HT1-7	LG3	78301	+	0	3
HT1-7	LG3	78312	+	0	3
HT1-7	LG3	78343	+	0	3
HT1-7	LG3	78394	+	1	2
HT1-7	LG3	78426	+	0	3
HT1-7	LG3	78429	+	2	1
HT1-7	LG3	78436	+	0	3
HT1-7	LG3	78447	+	0	3
HT1-7	LG3	78450	+	0	3
HT1-7	LG3	78460	+	0	3
HT1-7	LG3	78466	+	0	3
HT1-7	LG3	78511	+	0	3
HT1-7	LG3	78514	+	0	3
HT1-7	LG3	78570	+	0	3
HT1-7	LG3	78587	+	0	3
HT1-7	LG3	78590	+	0	3
HT1-7	LG3	78593	+	1	2
HT1-7	LG3	78596	+	0	3
HT1-7	LG3	78599	+	0	2
HT1-7	LG22-25	12484606	+	0	1
HT1-7	LG22-25	12484625	+	0	1
HT1-7	LG22-25	12484640	+	0	1
HT1-7	LG22-25	12484662	+	0	1
HT1-7	LG22-25	12484685	+	1	0
HT1-7	LG22-25	12484704	+	1	0
HT1-7	LG1A	20275424	-	2399	9
HT1-7	LG1A	20275509	-	1231	1185
HT1-7	LG1A	20275623	-	769	1645
HT1-7	LG2	10393124	-	2	0
HT1-7	LG2	10393134	-	2	0
HT1-7	LG2	10393152	-	0	2
HT1-7	LG2	10393170	-	0	2
HT1-7	LG2	10393189	-	0	2
HT1-7	LG2	10393191	-	0	2
HT1-7	LG2	10393198	-	0	2
HT1-7	LG2	10393211	-	0	2
HT1-7	LG2	10393219	-	0	2
HT1-7	LG2	10393225	-	0	2
HT1-7	LG2	10393231	-	0	2
HT1-7	LG2	10393240	-	0	2
HT1-7	LG2	10393252	-	0	2
HT1-7	LG2	10393254	-	0	2
HT1-7	LG2	10393323	-	0	2
HT1-7	LG2	10393364	-	0	2
HT1-7	LG2	10393371	-	0	2
HT1-7	LG2	10393373	-	0	2
HT1-7	LG2	10393404	-	0	2
HT1-7	LG2	10393441	-	0	2
HT1-7	LG2	10393444	-	0	2
HT1-7	LG10	22759382	-	1	0
HT1-7	LG10	22759490	-	1	0
HT1-7	LG10	22759513	-	1	0
HT1-7	LG10	22759540	-	0	1
HT2-10	LG12	22701256	+	8663	530
HT2-10	LG12	22701264	+	8703	488
HT2-10	LG12	22701279	+	8555	641
HT2-10	LG12	22701428	+	9079	16
HT2-10	LG1B	11628807	+	24230	4185
HT2-10	LG1B	11628870	+	22767	5643
HT2-10	LG1B	11628892	+	23609	4805
HT2-10	LG1B	11628926	+	28195	47
HT2-10	LG20	18505626	+	53	501
HT2-10	LG20	18505637	+	0	558
HT2-10	LG20	18505654	+	8	270
HT2-10	LG20	18505680	+	60	478
HT2-10	LG20	18505688	+	106	422
HT2-10	LG20	18505698	+	60	479
HT2-10	LG20	18505732	+	115	422
HT2-10	LG20	18505747	+	176	371
HT2-10	LG20	18505791	+	64	485
HT2-10	LG20	18505797	+	63	488
HT2-10	LG20	18505890	+	247	310
HT2-10	LG20	18505904	+	291	273
HT2-10	LG20	18505945	+	169	394
HT2-10	LG20	18505959	+	343	222
HT2-10	LG20	18505990	+	214	351
HT2-10	LG1A	20275424	-	5831	23
HT2-10	LG1A	20275509	-	2913	2972
HT2-10	LG1A	20275623	-	2039	3854
HT2-10	LG2	10393124	-	295	0
HT2-10	LG2	10393134	-	297	0
HT2-10	LG2	10393152	-	0	297
HT2-10	LG2	10393170	-	3	294
HT2-10	LG2	10393189	-	1	295
HT2-10	LG2	10393191	-	0	297
HT2-10	LG2	10393198	-	1	295
HT2-10	LG2	10393211	-	0	296
HT2-10	LG2	10393219	-	5	291
HT2-10	LG2	10393225	-	0	296
HT2-10	LG2	10393231	-	0	296
HT2-10	LG2	10393240	-	1	294
HT2-10	LG2	10393252	-	1	290
HT2-10	LG2	10393254	-	0	296
HT2-10	LG2	10393323	-	0	296
HT2-10	LG2	10393364	-	1	291
HT2-10	LG2	10393371	-	0	293
HT2-10	LG2	10393373	-	1	294
HT2-10	LG2	10393404	-	1	292
HT2-10	LG2	10393441	-	5	290
HT2-10	LG2	10393444	-	4	292
HT2-10	LG22-25	15149579	-	76	0
HT2-10	LG22-25	15149584	-	76	0
HT2-10	LGx	14305960	-	1	0
HT2-10	LGx	14305966	-	1	0
HT2-10	LGx	14305973	-	1	0
HT2-10	LGx	14305981	-	1	0
HT2-10	LGx	14305987	-	1	0
HT2-10	LGx	14306034	-	1	0
HT2-10	LGx	14306037	-	1	0
HT2-10	LGx	14306044	-	1	0
HT2-10	LGx	14306048	-	1	0
HT2-10	LGx	14306056	-	1	0
HT2-10	LGx	14306062	-	1	0
HT2-10	LGx	14306070	-	0	1
HT2-10	LGx	14306082	-	1	0
HT2-10	LGx	14306103	-	1	0
HT2-10	LGx	14306107	-	0	1
HT2-10	LGx	14306125	-	1	0
HT2-10	LGx	14306134	-	0	1
HT2-10	LGx	14306148	-	0	1
HT2-10	LGx	14306170	-	0	1
HT2-10	LGx	14306219	-	0	1
HT2-10	LGx	14306273	-	1	0
HT2-12	LG12	19732277	-	0	1
HT2-12	LG12	19732282	-	0	1
HT2-12	LG12	19732288	-	0	1
HT2-12	LG12	19732291	-	0	1
HT2-12	LG12	19732317	-	1	0
HT2-12	LG12	19732346	-	1	0
HT2-12	LG12	19732396	-	1	0
HT2-12	LG12	22701181	+	0	1
HT2-12	LG12	22701187	+	0	2
HT2-12	LG12	22701189	+	0	2
HT2-12	LG12	22701256	+	103479	5596
HT2-12	LG12	22701264	+	103862	5179
HT2-12	LG12	22701279	+	102385	6701
HT2-12	LG12	22701428	+	107687	388
HT2-12	LG1B	11628807	+	79270	15692
HT2-12	LG1B	11628870	+	72699	22445
HT2-12	LG1B	11628892	+	76992	18160
HT2-12	LG1B	11628926	+	94239	196
HT2-12	LG20	9089129	+	0	1
HT2-12	LG20	9089136	+	0	1
HT2-12	LG20	9089173	+	0	1
HT2-12	LG20	9089179	+	0	1
HT2-12	LG20	9089194	+	0	1
HT2-12	LG20	9089196	+	0	1
HT2-12	LG20	9089199	+	0	1
HT2-12	LG20	9089225	+	0	1
HT2-12	LG20	18505626	+	39	717
HT2-12	LG20	18505637	+	9	747
HT2-12	LG20	18505654	+	13	278
HT2-12	LG20	18505680	+	32	693
HT2-12	LG20	18505688	+	62	654
HT2-12	LG20	18505698	+	19	707
HT2-12	LG20	18505732	+	70	658
HT2-12	LG20	18505747	+	80	660
HT2-12	LG20	18505791	+	39	708
HT2-12	LG20	18505797	+	42	711
HT2-12	LG20	18505890	+	98	668
HT2-12	LG20	18505904	+	122	644
HT2-12	LG20	18505945	+	95	671
HT2-12	LG20	18505959	+	164	602
HT2-12	LG20	18505990	+	127	640
HT2-12	LG14	19247055	+	0	3
HT2-12	LG14	19247106	+	3	0
HT2-12	LG14	19247132	+	3	0
HT2-12	LG14	19247161	+	0	3
HT2-12	LG11	6883140	+	0	4
HT2-12	LG11	6883152	+	0	4
HT2-12	LG11	6883161	+	0	4
HT2-12	LG11	6883172	+	1	3
HT2-12	LG11	6883193	+	0	4
HT2-12	LG11	6883202	+	0	4
HT2-12	LG11	6883233	+	0	4
HT2-12	LG11	6883245	+	0	3
HT2-12	LG11	6883250	+	0	4
HT2-12	LG11	6883257	+	0	4
HT2-12	LG11	6883265	+	0	4
HT2-12	LG11	6883276	+	0	4
HT2-12	LG11	6883322	+	0	4
HT2-12	LG11	6883325	+	4	0
HT2-12	LG13	7386572	+	0	2
HT2-12	LG13	7386575	+	0	2
HT2-12	LG13	7386587	+	0	2
HT2-12	LG13	7386591	+	0	1
HT2-12	LG1A	3522237	-	1	0
HT2-12	LG1A	3522259	-	1	0
HT2-12	LG1A	3522266	-	1	0
HT2-12	LG1A	3522291	-	1	0
HT2-12	LG1A	3522303	-	1	0
HT2-12	LG1A	15375341	+	9	0
HT2-12	LG1A	15375355	+	9	0
HT2-12	LG1A	15375374	+	9	0
HT2-12	LG1A	15375379	+	9	0
HT2-12	LG1A	20275424	-	71455	441
HT2-12	LG1A	20275509	-	43442	28943
HT2-12	LG1A	20275623	-	27372	45041
HT2-12	LG1A	20275718	-	0	1
HT2-12	UN	60485737	-	3	0
HT2-12	UN	60485771	-	3	0
HT2-12	UN	60485795	-	3	0
HT2-12	UN	60485804	-	3	0
HT2-12	UN	60485815	-	3	0
HT2-12	UN	60485822	-	3	0
HT2-12	UN	60485830	-	3	0
HT2-12	UN	60485837	-	3	0
HT2-12	UN	60485842	-	3	0
HT2-12	UN	89940623	+	0	1
HT2-12	UN	89940646	+	0	1
HT2-12	UN	89940672	+	0	1
HT2-12	LG2	7982941	-	1	0
HT2-12	LG2	10393124	-	3665	4
HT2-12	LG2	10393134	-	3654	1
HT2-12	LG2	10393152	-	11	3651
HT2-12	LG2	10393170	-	13	3642
HT2-12	LG2	10393189	-	14	3644
HT2-12	LG2	10393191	-	14	3645
HT2-12	LG2	10393198	-	16	3647
HT2-12	LG2	10393211	-	10	3642
HT2-12	LG2	10393219	-	18	3642
HT2-12	LG2	10393225	-	9	3600
HT2-12	LG2	10393231	-	30	3575
HT2-12	LG2	10393240	-	11	3607
HT2-12	LG2	10393252	-	21	3589
HT2-12	LG2	10393254	-	12	3607
HT2-12	LG2	10393323	-	6	3612
HT2-12	LG2	10393364	-	14	3601
HT2-12	LG2	10393371	-	18	3600
HT2-12	LG2	10393373	-	15	3601
HT2-12	LG2	10393404	-	8	3598
HT2-12	LG2	10393441	-	20	3585
HT2-12	LG2	10393444	-	16	3601
HT2-12	LG10	162769	-	0	1
HT2-12	LG10	162812	-	0	10
HT2-12	LG10	162814	-	0	10
HT2-12	LG10	162817	-	0	10
HT2-12	LG10	162853	-	0	10
HT2-12	LG10	162859	-	1	9
HT2-12	LG10	22759382	-	135	0
HT2-12	LG10	22759490	-	134	1
HT2-12	LG10	22759513	-	135	0
HT2-12	LG10	22759540	-	1	134
HT2-12	LG5	6840623	-	143	211
HT2-12	LG22-25	24752944	-	2	2
HT2-12	LG22-25	24753059	-	4	0
HT2-12	LGx	14305960	-	0	2
HT2-12	LGx	14305966	-	0	2
HT2-12	LGx	14305973	-	0	2
HT2-12	LGx	14305981	-	0	2
HT2-12	LGx	14305987	-	0	2
HT2-12	LGx	14306034	-	0	2
HT2-12	LGx	14306037	-	0	2
HT2-12	LGx	14306044	-	0	2
HT2-12	LGx	14306048	-	0	2
HT2-12	LGx	14306056	-	0	2
HT2-12	LGx	14306062	-	0	2
HT2-12	LGx	14306070	-	0	2
HT2-12	LGx	14306082	-	0	2
HT2-12	LGx	14306103	-	0	2
HT2-12	LGx	14306107	-	0	2
HT2-12	LGx	14306125	-	0	2
HT2-12	LGx	14306134	-	0	2
HT2-12	LGx	14306148	-	0	2
HT2-12	LGx	14306170	-	0	2
HT2-12	LGx	14306219	-	0	2
HT2-12	LGx	14306273	-	0	2
HT2-14	LG1B	11628807	+	47267	12801
HT2-14	LG1B	11628870	+	44567	15565
HT2-14	LG1B	11628892	+	45070	15055
HT2-14	LG1B	11628926	+	59684	114
HT2-14	LG12	22623418	+	53	1
HT2-14	LG12	22623470	+	54	0
HT2-14	LG12	22623553	+	3	1
HT2-14	LG12	22701256	+	8355	369
HT2-14	LG12	22701264	+	8408	315
HT2-14	LG12	22701279	+	8327	396
HT2-14	LG12	22701428	+	8637	21
HT2-14	LG20	18505626	+	154	1120
HT2-14	LG20	18505637	+	80	1197
HT2-14	LG20	18505654	+	36	437
HT2-14	LG20	18505680	+	116	1123
HT2-14	LG20	18505688	+	196	1025
HT2-14	LG20	18505698	+	65	1172
HT2-14	LG20	18505732	+	186	1050
HT2-14	LG20	18505747	+	310	941
HT2-14	LG20	18505791	+	189	1070
HT2-14	LG20	18505797	+	182	1085
HT2-14	LG20	18505890	+	523	778
HT2-14	LG20	18505904	+	626	676
HT2-14	LG20	18505945	+	367	934
HT2-14	LG20	18505959	+	782	521
HT2-14	LG20	18505990	+	453	848
HT2-14	UN	20171323	-	0	6
HT2-14	UN	20171339	-	0	6
HT2-14	UN	20171345	-	0	6
HT2-14	UN	20171361	-	0	6
HT2-14	UN	20171387	-	0	6
HT2-14	UN	20171410	-	0	6
HT2-14	UN	20171443	-	0	6
HT2-14	UN	20171451	-	0	6
HT2-14	UN	20171461	-	0	6
HT2-14	UN	20171533	-	0	6
HT2-14	UN	20171541	-	0	6
HT2-14	UN	20171550	-	0	6
HT2-14	UN	20171553	-	0	6
HT2-14	UN	20171556	-	0	6
HT2-14	UN	20171571	-	0	6
HT2-14	UN	30553821	-	0	1
HT2-14	UN	30553847	-	0	1
HT2-14	UN	30553870	-	0	1
HT2-14	UN	30553903	-	0	1
HT2-14	UN	30553911	-	0	1
HT2-14	UN	30553921	-	0	1
HT2-14	UN	30553993	-	0	1
HT2-14	UN	30554001	-	0	1
HT2-14	UN	30554010	-	0	1
HT2-14	UN	30554013	-	0	1
HT2-14	UN	30554016	-	0	1
HT2-14	UN	30554031	-	0	1
HT2-14	UN	89558762	-	0	1
HT2-14	UN	89558779	-	0	1
HT2-14	UN	89558785	-	0	1
HT2-14	UN	89558801	-	0	1
HT2-14	UN	89558827	-	0	1
HT2-14	UN	89558850	-	0	1
HT2-14	UN	89558883	-	0	1
HT2-14	UN	89558891	-	0	1
HT2-14	UN	89558901	-	0	1
HT2-14	UN	89558973	-	0	1
HT2-14	UN	89558981	-	0	1
HT2-14	UN	89558990	-	0	1
HT2-14	UN	89558993	-	0	1
HT2-14	UN	89558996	-	0	1
HT2-14	UN	89559011	-	0	1
HT2-14	UN	89559017	-	0	1
HT2-14	UN	93911706	+	0	2
HT2-14	UN	93911709	+	0	2
HT2-14	UN	93911718	+	0	2
HT2-14	UN	93911726	+	0	2
HT2-14	UN	93911797	+	0	2
HT2-14	UN	93911807	+	0	2
HT2-14	UN	93911815	+	0	2
HT2-14	UN	93911848	+	0	2
HT2-14	UN	93911871	+	0	2
HT2-14	UN	93911897	+	0	2
HT2-14	UN	93911913	+	0	2
HT2-14	UN	93911935	+	0	2
HT2-14	LG1A	20275424	-	8627	31
HT2-14	LG1A	20275509	-	3876	4849
HT2-14	LG1A	20275623	-	2552	6172
HT2-14	LG2	10393124	-	1816	3
HT2-14	LG2	10393134	-	1813	0
HT2-14	LG2	10393152	-	2	1819
HT2-14	LG2	10393170	-	7	1814
HT2-14	LG2	10393189	-	11	1808
HT2-14	LG2	10393191	-	5	1813
HT2-14	LG2	10393198	-	9	1811
HT2-14	LG2	10393211	-	7	1814
HT2-14	LG2	10393219	-	6	1806
HT2-14	LG2	10393225	-	4	1814
HT2-14	LG2	10393231	-	23	1796
HT2-14	LG2	10393240	-	3	1820
HT2-14	LG2	10393252	-	7	1813
HT2-14	LG2	10393254	-	6	1810
HT2-14	LG2	10393323	-	6	1812
HT2-14	LG2	10393364	-	6	1803
HT2-14	LG2	10393371	-	4	1808
HT2-14	LG2	10393373	-	5	1808
HT2-14	LG2	10393404	-	6	1808
HT2-14	LG2	10393441	-	4	1807
HT2-14	LG2	10393444	-	12	1805
HT2-16	LG12	22623418	+	5	0
HT2-16	LG12	22623470	+	5	0
HT2-16	LG12	22701256	+	72876	4285
HT2-16	LG12	22701264	+	73191	3937
HT2-16	LG12	22701279	+	72123	5034
HT2-16	LG12	22701428	+	76265	219
HT2-16	LG1B	1832030	-	1	0
HT2-16	LG1B	1832070	-	1	0
HT2-16	LG1B	1832162	-	1	0
HT2-16	LG1B	1832169	-	1	0
HT2-16	LG1B	1832177	-	1	0
HT2-16	LG1B	1832181	-	1	0
HT2-16	LG1B	1832227	-	1	0
HT2-16	LG1B	11628807	+	28643	5236
HT2-16	LG1B	11628870	+	26028	7899
HT2-16	LG1B	11628892	+	27309	6598
HT2-16	LG1B	11628926	+	33663	60
HT2-16	LG13	7386572	+	0	2
HT2-16	LG13	7386575	+	0	2
HT2-16	LG13	7386587	+	0	2
HT2-16	LG13	7386591	+	0	2
HT2-16	LG20	3929059	+	0	1
HT2-16	LG20	3929080	+	1	0
HT2-16	LG20	3929136	+	1	0
HT2-16	LG20	3929156	+	1	0
HT2-16	LG20	3929160	+	1	0
HT2-16	LG20	3929172	+	1	0
HT2-16	LG20	3929175	+	1	0
HT2-16	LG20	3929185	+	1	0
HT2-16	LG20	9089129	+	0	3
HT2-16	LG20	9089136	+	0	3
HT2-16	LG20	9089173	+	0	3
HT2-16	LG20	9089179	+	0	3
HT2-16	LG20	9089194	+	0	3
HT2-16	LG20	9089196	+	0	3
HT2-16	LG20	9089199	+	0	3
HT2-16	LG20	9089225	+	0	3
HT2-16	LG20	18505626	+	28	384
HT2-16	LG20	18505637	+	4	407
HT2-16	LG20	18505654	+	6	159
HT2-16	LG20	18505680	+	20	376
HT2-16	LG20	18505688	+	48	337
HT2-16	LG20	18505698	+	18	380
HT2-16	LG20	18505732	+	74	326
HT2-16	LG20	18505747	+	91	310
HT2-16	LG20	18505791	+	36	370
HT2-16	LG20	18505797	+	39	368
HT2-16	LG20	18505890	+	129	280
HT2-16	LG20	18505904	+	158	254
HT2-16	LG20	18505945	+	108	304
HT2-16	LG20	18505959	+	215	197
HT2-16	LG20	18505990	+	140	272
HT2-16	LG14	19247055	+	0	7
HT2-16	LG14	19247106	+	7	0
HT2-16	LG14	19247132	+	7	0
HT2-16	LG14	19247161	+	0	7
HT2-16	LG15	22974352	+	0	1
HT2-16	UN	78853634	+	0	2
HT2-16	UN	78853648	+	0	2
HT2-16	UN	78853680	+	0	2
HT2-16	UN	78853688	+	0	2
HT2-16	LG9	13473437	+	2	0
HT2-16	LG11	6883140	+	0	1
[truncated: 27,302 more rows]

## Sheet: cyp19_sb_genome
Chromosome	CpG start	CpG end	Chromosome	Amplicon start -30bp	Amplicon end +30bp	Strand	Transcript ID	Gene name	Gene symbol	Amplicon width
LG5	21022163	21022164	LG5	21022114	21022691	-	DLAgn_00160670	cytochrome_p450_aromatase	cyp19	517
LG5	21022214	21022215	LG5	21022114	21022691	-	DLAgn_00160670	cytochrome_p450_aromatase	cyp19	517
LG5	21022235	21022236	LG5	21022114	21022691	-	DLAgn_00160670	cytochrome_p450_aromatase	cyp19	517
LG5	21022255	21022256	LG5	21022114	21022691	-	DLAgn_00160670	cytochrome_p450_aromatase	cyp19	517
LG5	21022271	21022272	LG5	21022114	21022691	-	DLAgn_00160670	cytochrome_p450_aromatase	cyp19	517
LG5	21022278	21022279	LG5	21022114	21022691	-	DLAgn_00160670	cytochrome_p450_aromatase	cyp19	517
LG5	21022651	21022652	LG5	21022114	21022691	-	DLAgn_00160670	cytochrome_p450_aromatase	cyp19	517

## Sheet: othergenes_sb_genome
Chromosome	Amplicon start	Amplicon end	Strand	Transcript ID	Gene name	Gene symbol
LG20	18505558	18506031	+	DLAgn_00122300	doublesex_and_mab-3_related_transcription_factor_1	dmrt1
LG12	22701193	22701431	+	DLAgn_00027190	estrogen_receptor_beta_2	erb2
LG13	7386532	7387034	+	DLAgn_00029260	forkhead_box_l2	foxl2
LG2	10393075	10393546	-	DLAgn_00110340	glucocorticoid_receptor	gr
LG1B	11628728	11628946	+	DLAgn_00103530	follicle_stimulating_hormone_receptor	fshr
LG1A	20275419	20275717	-	DLAgn_00095200	anti-mullerian_hormone receptor	amhr

## Sheet: sample_codes
Sample	Sex	Temperature	Genetic background	Tank
HT1-1	M	High	Fprone	HT1
HT1-10	M	High	Fprone	HT1
HT1-11	M	High	Fprone	HT1
HT1-12	M	High	Fprone	HT1
HT1-13	M	High	Fprone	HT1
HT1-14	M	High	Fprone	HT1
HT1-15	M	High	Fprone	HT1
HT1-16	M	High	Fprone	HT1
HT1-17	M	High	Fprone	HT1
HT1-18	F	High	Fprone	HT1
HT1-19	M	High	Fprone	HT1
HT1-2	F	High	Fprone	HT1
HT1-20	M	High	Fprone	HT1
HT1-21	M	High	Fprone	HT1
HT1-22	F	High	Fprone	HT1
HT1-23	M	High	Fprone	HT1
HT1-24	M	High	Fprone	HT1
HT1-25	M	High	Fprone	HT1
HT1-26	M	High	Fprone	HT1
HT1-27	M	High	Fprone	HT1
HT1-28	M	High	Fprone	HT1
HT1-29	M	High	Fprone	HT1
HT1-3	F	High	Fprone	HT1
HT1-30	M	High	Fprone	HT1
HT1-4	F	High	Fprone	HT1
HT1-5	F	High	Fprone	HT1
HT1-6	F	High	Fprone	HT1
HT1-7	F	High	Fprone	HT1
HT1-9	F	High	Fprone	HT1
HT2-1	M	High	Fprone	HT2
HT2-10	F	High	Fprone	HT2
HT2-11	M	High	Fprone	HT2
HT2-12	M	High	Fprone	HT2
HT2-13	F	High	Fprone	HT2
HT2-14	F	High	Fprone	HT2
HT2-15	M	High	Fprone	HT2
HT2-16	F	High	Fprone	HT2
HT2-17	M	High	Fprone	HT2
HT2-18	M	High	Fprone	HT2
HT2-19	M	High	Fprone	HT2
HT2-2	F	High	Fprone	HT2
HT2-20	M	High	Fprone	HT2
HT2-21	M	High	Fprone	HT2
HT2-22	M	High	Fprone	HT2
HT2-23	F	High	Fprone	HT2
HT2-24	M	High	Fprone	HT2
HT2-25	F	High	Fprone	HT2
HT2-26	M	High	Fprone	HT2
HT2-27	M	High	Fprone	HT2
HT2-28	M	High	Fprone	HT2
HT2-29	M	High	Fprone	HT2
HT2-3	M	High	Fprone	HT2
HT2-30	M	High	Fprone	HT2
HT2-4	M	High	Fprone	HT2
HT2-5	F	High	Fprone	HT2
HT2-6	F	High	Fprone	HT2
HT2-7	M	High	Fprone	HT2
HT2-8	M	High	Fprone	HT2
HT2-9	F	High	Fprone	HT2
HT3-1	F	High	Mprone	HT3
HT3-10	M	High	Mprone	HT3
HT3-11	M	High	Mprone	HT3
HT3-12	F	High	Mprone	HT3
HT3-13	M	High	Mprone	HT3
HT3-14	M	High	Mprone	HT3
HT3-15	M	High	Mprone	HT3
HT3-16	M	High	Mprone	HT3
HT3-17	F	High	Mprone	HT3
HT3-18	M	High	Mprone	HT3
HT3-19	M	High	Mprone	HT3
HT3-2	M	High	Mprone	HT3
HT3-20	M	High	Mprone	HT3
HT3-21	M	High	Mprone	HT3
HT3-22	M	High	Mprone	HT3
HT3-23	M	High	Mprone	HT3
HT3-24	F	High	Mprone	HT3
HT3-25	F	High	Mprone	HT3
HT3-26	F	High	Mprone	HT3
HT3-27	F	High	Mprone	HT3
HT3-28	F	High	Mprone	HT3
HT3-29	F	High	Mprone	HT3
HT3-3	M	High	Mprone	HT3
HT3-30	F	High	Mprone	HT3
HT3-4	M	High	Mprone	HT3
HT3-5	M	High	Mprone	HT3
HT3-6	M	High	Mprone	HT3
HT3-7	M	High	Mprone	HT3
HT3-8	M	High	Mprone	HT3
HT3-9	M	High	Mprone	HT3
HT4-1	M	High	Mprone	HT4
HT4-10	M	High	Mprone	HT4
HT4-11	M	High	Mprone	HT4
HT4-12	M	High	Mprone	HT4
HT4-13	M	High	Mprone	HT4
HT4-14	M	High	Mprone	HT4
HT4-15	M	High	Mprone	HT4
HT4-16	M	High	Mprone	HT4
HT4-18	M	High	Mprone	HT4
HT4-19	M	High	Mprone	HT4
HT4-2	M	High	Mprone	HT4
HT4-20	M	High	Mprone	HT4
HT4-21	F	High	Mprone	HT4
HT4-22	F	High	Mprone	HT4
HT4-23	F	High	Mprone	HT4
HT4-24	F	High	Mprone	HT4
HT4-25	F	High	Mprone	HT4
HT4-26	F	High	Mprone	HT4
HT4-27	F	High	Mprone	HT4
HT4-3	M	High	Mprone	HT4
HT4-4	M	High	Mprone	HT4
HT4-5	M	High	Mprone	HT4
HT4-6	M	High	Mprone	HT4
HT4-7	M	High	Mprone	HT4
HT4-8	M	High	Mprone	HT4
HT4-9	M	High	Mprone	HT4
LT1-10	M	Low	Fprone	LT1
LT1-11	F	Low	Fprone	LT1
LT1-12	F	Low	Fprone	LT1
LT1-13	F	Low	Fprone	LT1
LT1-14	F	Low	Fprone	LT1
LT1-16	F	Low	Fprone	LT1
LT1-17	M	Low	Fprone	LT1
LT1-18	M	Low	Fprone	LT1
LT1-19	M	Low	Fprone	LT1
LT1-20	M	Low	Fprone	LT1
LT1-3	M	Low	Fprone	LT1
LT1-4	F	Low	Fprone	LT1
LT1-5	F	Low	Fprone	LT1
LT1-6	F	Low	Fprone	LT1
LT1-7	M	Low	Fprone	LT1
LT1-9	M	Low	Fprone	LT1
LT2-1	F	Low	Fprone	LT2
LT2-10	M	Low	Fprone	LT2
LT2-12	M	Low	Fprone	LT2
LT2-13	F	Low	Fprone	LT2
LT2-14	M	Low	Fprone	LT2
LT2-16	M	Low	Fprone	LT2
LT2-17	F	Low	Fprone	LT2
LT2-18	M	Low	Fprone	LT2
LT2-19	F	Low	Fprone	LT2
LT2-2	F	Low	Fprone	LT2
LT2-20	F	Low	Fprone	LT2
LT2-3	M	Low	Fprone	LT2
LT2-4	M	Low	Fprone	LT2
LT2-6	F	Low	Fprone	LT2
LT2-7	F	Low	Fprone	LT2
LT2-8	M	Low	Fprone	LT2
LT2-9	F	Low	Fprone	LT2
LT3-1	M	Low	Mprone	LT3
LT3-10	F	Low	Mprone	LT3
LT3-11	M	Low	Mprone	LT3
LT3-12	M	Low	Mprone	LT3
LT3-13	M	Low	Mprone	LT3
LT3-17	F	Low	Mprone	LT3
LT3-18	F	Low	Mprone	LT3
LT3-19	F	Low	Mprone	LT3
LT3-2	M	Low	Mprone	LT3
LT3-20	F	Low	Mprone	LT3
LT3-21	M	Low	Mprone	LT3
LT3-22	M	Low	Mprone	LT3
LT3-23	F	Low	Mprone	LT3
LT3-3	F	Low	Mprone	LT3
LT3-5	M	Low	Mprone	LT3
LT3-6	M	Low	Mprone	LT3
LT3-8	M	Low	Mprone	LT3
LT3-9	F	Low	Mprone	LT3
LT4-1	M	Low	Mprone	LT4
LT4-10	M	Low	Mprone	LT4
LT4-11	F	Low	Mprone	LT4
LT4-13	M	Low	Mprone	LT4
LT4-14	F	Low	Mprone	LT4
LT4-15	M	Low	Mprone	LT4
LT4-17	F	Low	Mprone	LT4
LT4-18	M	Low	Mprone	LT4
LT4-19	F	Low	Mprone	LT4
LT4-2	M	Low	Mprone	LT4
LT4-20	F	Low	Mprone	LT4
LT4-3	F	Low	Mprone	LT4
LT4-5	F	Low	Mprone	LT4
LT4-6	M	Low	Mprone	LT4
LT4-7	F	Low	Mprone	LT4
LT4-8	F	Low	Mprone	LT4
LT4-9	F	Low	Mprone	LT4
QD2	F	Low	NA	NA
HD2	F	Low	NA	NA
HAVM41	M	Low	Fprone	NA
HAVM39	M	Low	Mprone	NA
HAVM38	M	Low	Fprone	NA
HAVM19	M	Low	Mprone	NA

## Sheet: Sire_codes
Sample	Temperature	Sex	Code Father
HT3-1	High	F	b
HT3-12	High	F	b
HT3-17	High	F	b
HT3-24	High	F	b
HT3-25	High	F	b
HT3-26	High	F	b
HT3-27	High	F	b
HT3-28	High	F	b
HT3-29	High	F	b
HT4-21	High	F	b
HT4-22	High	F	b
HT4-23	High	F	b
HT4-24	High	F	b
HT4-25	High	F	b
HT4-26	High	F	b
LT3-3	Low	F	b
LT3-9	Low	F	b
LT3-10	Low	F	b
LT3-15	Low	F	b
LT3-16	Low	F	b
LT3-17	Low	F	b
LT3-18	Low	F	b
LT3-19	Low	F	b
LT3-20	Low	F	b
LT3-23	Low	F	b
LT4-5	Low	F	b
LT4-7	Low	F	b
LT4-8	Low	F	b
LT4-9	Low	F	b
LT4-11	Low	F	b
LT4-17	Low	F	b
LT4-19	Low	F	b
LT4-20	Low	F	b
HT1-4	High	F	d
HT1-5	High	F	d
HT1-6	High	F	d
HT1-9	High	F	d
HT1-22	High	F	d
HT2-2	High	F	d
HT2-5	High	F	d
HT2-9	High	F	d
HT2-13	High	F	d
HT2-16	High	F	d
HT2-23	High	F	d
HT2-25	High	F	d
LT1-1	Low	F	d
LT1-6	Low	F	d
LT1-12	Low	F	d
LT1-13	Low	F	d
LT1-14	Low	F	d
LT2-2	Low	F	d
LT2-6	Low	F	d
LT2-7	Low	F	d
LT2-9	Low	F	d
LT2-17	Low	F	d
LT2-19	Low	F	d
LT2-20	Low	F	d
HT3-30	High	F	a
HT4-27	High	F	a
LT4-3	Low	F	a
LT4-14	Low	F	a
HT1-2	High	F	c
HT1-3	High	F	c
HT1-7	High	F	c
HT1-8	High	F	c
HT1-18	High	F	c
HT2-6	High	F	c
HT2-10	High	F	c
HT2-14	High	F	c
LT1-5	Low	F	c
LT1-11	Low	F	c
LT1-15	Low	F	c
LT1-16	Low	F	c
LT2-1	Low	F	c
LT2-11	Low	F	c
LT2-13	Low	F	c
HT3-2	High	M	b
HT3-3	High	M	b
HT3-4	High	M	b
HT3-5	High	M	b
HT3-7	High	M	b
HT3-9	High	M	b
HT3-11	High	M	b
HT3-15	High	M	b
HT3-16	High	M	b
HT3-18	High	M	b
HT3-19	High	M	b
HT3-20	High	M	b
HT3-22	High	M	b
HT3-23	High	M	b
HT4-1	High	M	b
HT4-2	High	M	b
HT4-3	High	M	b
HT4-4	High	M	b
HT4-5	High	M	b
HT4-6	High	M	b
HT4-7	High	M	b
HT4-8	High	M	b
HT4-9	High	M	b
HT4-10	High	M	b
HT4-11	High	M	b
HT4-17	High	M	b
HT4-18	High	M	b
LT3-463	Low	M	b
LT3-1	Low	M	b
LT3-5	Low	M	b
LT3-6	Low	M	b
LT3-7	Low	M	b
LT3-8	Low	M	b
LT3-11	Low	M	b
LT3-12	Low	M	b
LT3-13	Low	M	b
LT3-14	Low	M	b
LT3-21	Low	M	b
LT3-22	Low	M	b
LT4-2	Low	M	b
LT4-4	Low	M	b
LT4-6	Low	M	b
LT4-10	Low	M	b
LT4-12	Low	M	b
LT4-13	Low	M	b
LT4-15	Low	M	b
LT4-16	Low	M	b
LT4-18	Low	M	b
HT1-1	High	M	d
HT1-10	High	M	d
HT1-13	High	M	d
HT1-14	High	M	d
HT1-15	High	M	d
HT1-16	High	M	d
HT1-17	High	M	d
HT1-20	High	M	d
HT1-23	High	M	d
HT1-25	High	M	d
HT1-27	High	M	d
HT1-30	High	M	d
HT2-1	High	M	d
HT2-3	High	M	d
HT2-7	High	M	d
HT2-8	High	M	d
HT2-11	High	M	d
HT2-12	High	M	d
HT2-15	High	M	d
HT2-17	High	M	d
HT2-20	High	M	d
HT2-22	High	M	d
HT2-24	High	M	d
HT2-26	High	M	d
HT2-27	High	M	d
HT2-28	High	M	d
HT2-30	High	M	d
LT1-2	Low	M	d
LT1-7	Low	M	d
LT1-8	Low	M	d
LT1-9	Low	M	d
LT2-16	Low	M	d
LT2-5	Low	M	d
LT2-10	Low	M	d
HT3-6	High	M	a
HT3-8	High	M	a
HT3-10	High	M	a
HT3-13	High	M	a
HT3-14	High	M	a
HT3-21	High	M	a
HT4-12	High	M	a
HT4-13	High	M	a
HT4-15	High	M	a
HT4-16	High	M	a
HT4-19	High	M	a
HT4-20	High	M	a
LT3-2	Low	M	a
LT3-4	Low	M	a
HT1-11	High	M	c
HT1-12	High	M	c
HT1-19	High	M	c
HT1-21	High	M	c
HT1-24	High	M	c
HT1-26	High	M	c
HT1-28	High	M	c
HT1-29	High	M	c
HT2-4	High	M	c
HT2-18	High	M	c
HT2-21	High	M	c
HT4-14	High	M	c
LT1-3	Low	M	c
LT1-10	Low	M	c
LT1-17	Low	M	c
LT1-18	Low	M	c
LT1-19	Low	M	c
LT1-20	Low	M	c
LT2-3	Low	M	c
LT2-4	Low	M	c
LT2-8	Low	M	c
LT2-12	Low	M	c
LT2-14	Low	M	c
LT2-15	Low	M	c
LT2-18	Low	M	c

## Sheet: GE
Code Father	Sample	Sex	Temperature	(-dCq)	2dCq
a	HT3-30	F	H	-6.22354	0.00853211
a	HT4-27	F	H	-5.7299	0.0124498
b	HT3-1	F	H	-5.34166	0.0167582
b	HT3-12	F	H	-5.63887	0.0133482
b	HT3-17	F	H	-5.15897	0.0192734
b	HT3-24	F	H	-5.37773	0.0163018
b	HT3-25	F	H	-5.91616	0.0107955
b	HT3-26	F	H	-4.92692	0.0230199
b	HT3-27	F	H	-5.68985	0.0128373
b	HT3-28	F	H	-5.36576	0.0164519
b	HT3-29	F	H	-5.2578	0.0178692
b	HT4-21	F	H	-4.97863	0.0221264
b	HT4-22	F	H	-5.05279	0.0209053
b	HT4-23	F	H	-6.17322	0.00886716
b	HT4-24	F	H	-4.7606	0.0261453
b	HT4-25	F	H	-4.83144	0.0247653
b	HT4-26	F	H	-6.21381	0.0085959
c	HT1-18	F	H	-5.72495	0.012497
c	HT1-2	F	H	-5.4743	0.0151402
c	HT1-3	F	H	-6.23609	0.00845052
c	HT1-7	F	H	-5.94128	0.0105898
c	HT1-9	F	H	-6.45329	0.00715613
c	HT2-10	F	H	-4.44677	0.0332446
c	HT2-6	F	H	-4.81762	0.0250288
d	HT1-22	F	H	-5.79	0.01189
d	HT1-4	F	H	-6.70899	0.00588403
d	HT1-5	F	H	-6.02976	0.00989638
d	HT1-6	F	H	-6.50756	0.00686492
d	HT2-13	F	H	-6.38894	0.00751745
d	HT2-14	F	H	-5.43433	0.0156106
d	HT2-16	F	H	-6.4392	0.00723375
d	HT2-2	F	H	-4.61817	0.0291571
d	HT2-23	F	H	-6.6193	0.00630217
d	HT2-25	F	H	-6.11336	0.00928289
d	HT2-5	F	H	-3.45772	0.0708794
d	HT2-9	F	H	-4.28072	0.0377506
a	LT4-14	F	L	-6.71041	0.00587761
a	LT4-3	F	L	-5.22064	0.0183848
b	LT3-10	F	L	-4.91684	0.0231982
b	LT3-17	F	L	-5.81615	0.0116543
b	LT3-18	F	L	-5.0037	0.0217058
b	LT3-19	F	L	-5.71558	0.0125869
b	LT3-20	F	L	-5.70476	0.0126916
b	LT3-23	F	L	-5.59182	0.0138377
b	LT3-3	F	L	-5.71196	0.0126219
b	LT3-9	F	L	-5.11003	0.0200093
b	LT4-11	F	L	-6.29521	0.00807666
b	LT4-17	F	L	-6.69416	0.0059512
b	LT4-19	F	L	-6.14639	0.00905113
b	LT4-20	F	L	-5.94495	0.0105602
b	LT4-5	F	L	-5.00363	0.021707
b	LT4-7	F	L	-5.16485	0.0191869
b	LT4-8	F	L	-5.40238	0.0159971
b	LT4-9	F	L	-5.29272	0.0173979
c	LT1-11	F	L	-6.11658	0.00926004
c	LT1-16	F	L	-6.06993	0.00959668
c	LT1-5	F	L	-4.13372	0.0422468
c	LT2-13	F	L	-5.46902	0.0152015
d	LT1-12	F	L	-6.21923	0.00856027
d	LT1-13	F	L	-5.96164	0.0104261
d	LT1-14	F	L	-6.31753	0.00793982
d	LT1-6	F	L	-6.25811	0.00830928
d	LT2-1	F	L	-5.21467	0.018469
d	LT2-17	F	L	-5.78573	0.0119289
d	LT2-19	F	L	-5.80733	0.0117333
d	LT2-2	F	L	-6.25992	0.00829779
d	LT2-20	F	L	-5.03221	0.0212373
d	LT2-6	F	L	-7.21005	0.00400961
d	LT2-7	F	L	-5.44424	0.0154927
d	LT2-9	F	L	-5.59783	0.0137741
a	HT3-10	M	H	-5.12513	0.0197793
a	HT3-13	M	H	-6.75597	0.00567616
a	HT3-14	M	H	-6.90777	0.0050535
a	HT3-21	M	H	-7.26615	0.00384107
a	HT3-8	M	H	-7.79121	0.00256981
a	HT4-12	M	H	-6.53308	0.00673212
a	HT4-13	M	H	-5.96888	0.0103685
a	HT4-15	M	H	-5.91332	0.0108189
a	HT4-16	M	H	-5.67201	0.0130139
a	HT4-19	M	H	-6.02731	0.00991492
a	HT4-20	M	H	-6.27272	0.00821686
b	HT3-11	M	H	-6.93637	0.00494407
b	HT3-15	M	H	-6.47722	0.00702623
b	HT3-16	M	H	-7.95033	0.00227511
b	HT3-18	M	H	-6.45984	0.00712037
b	HT3-19	M	H	-6.03784	0.00983539
b	HT3-2	M	H	-5.80659	0.0117399
b	HT3-20	M	H	-5.4879	0.0149834
b	HT3-22	M	H	-6.31305	0.00796708
b	HT3-23	M	H	-6.17942	0.0088252
b	HT3-3	M	H	-6.1093	0.00931177
b	HT3-4	M	H	-6.86183	0.00523435
b	HT3-5	M	H	-7.20911	0.00401248
b	HT3-6	M	H	-6.95787	0.00486334
b	HT3-7	M	H	-5.95774	0.0104573
b	HT3-9	M	H	-6.40248	0.00743992
b	HT4-1	M	H	-5.89737	0.0109519
b	HT4-10	M	H	-5.58897	0.013868
b	HT4-11	M	H	-5.9683	0.0103731
b	HT4-18	M	H	-6.58558	0.00646694
b	HT4-2	M	H	-6.99133	0.00474038
b	HT4-3	M	H	-6.91846	0.00501233
b	HT4-4	M	H	-6.08423	0.00949223
b	HT4-5	M	H	-8.59324	0.00139083
b	HT4-6	M	H	-7.49583	0.0032218
b	HT4-7	M	H	-6.41005	0.00739694
b	HT4-8	M	H	-7.49658	0.00321996
b	HT4-9	M	H	-7.46499	0.00329876
c	HT1-11	M	H	-5.8049	0.0117552
c	HT1-12	M	H	-5.48832	0.0149786
c	HT1-19	M	H	-6.62686	0.00626581
c	HT1-21	M	H	-5.29322	0.0173912
c	HT1-24	M	H	-6.14121	0.00908713
c	HT1-26	M	H	-6.27391	0.00820939
c	HT1-28	M	H	-6.47806	0.00702173
c	HT1-29	M	H	-6.64019	0.0062022
c	HT2-18	M	H	-6.49802	0.00691527
c	HT2-21	M	H	-7.00791	0.00468059
c	HT2-4	M	H	-7.02622	0.00461545
d	HT1-1	M	H	-5.87491	0.0111418
d	HT1-10	M	H	-6.49542	0.00692902
d	HT1-13	M	H	-6.34408	0.00778008
d	HT1-14	M	H	-5.06609	0.0206937
d	HT1-15	M	H	-6.4847	0.00698615
d	HT1-16	M	H	-6.0943	0.00941937
d	HT1-17	M	H	-5.89978	0.0109317
d	HT1-20	M	H	-4.99309	0.0218829
d	HT1-23	M	H	-6.27924	0.00817596
d	HT1-25	M	H	-5.88109	0.0110892
d	HT1-27	M	H	-5.93217	0.010664
d	HT1-30	M	H	-5.13781	0.0195882
d	HT2-1	M	H	-6.58304	0.00647952
d	HT2-11	M	H	-6.73698	0.00575927
d	HT2-12	M	H	-6.40415	0.00743045
d	HT2-15	M	H	-6.82806	0.00537144
d	HT2-17	M	H	-6.32931	0.00786855
d	HT2-20	M	H	-7.02939	0.00460426
d	HT2-22	M	H	-7.01658	0.00464962
d	HT2-24	M	H	-5.92016	0.0107625
d	HT2-26	M	H	-6.87133	0.00519645
d	HT2-27	M	H	-6.81145	0.00544016
d	HT2-28	M	H	-7.30839	0.00371885
d	HT2-3	M	H	-6.98789	0.00475288
d	HT2-30	M	H	-6.49975	0.00690612
d	HT2-7	M	H	-6.16064	0.00895297
d	HT2-8	M	H	-6.05396	0.00971477
b	LT3-1	M	L	-8.49305	0.0015017
b	LT3-11	M	L	-8.00042	0.00218955
b	LT3-12	M	L	-5.87152	0.0111707
b	LT3-13	M	L	-7.39549	0.00347901
b	LT3-21	M	L	-7.27823	0.00380571
b	LT3-22	M	L	-4.97253	0.0222301
b	LT3-5	M	L	-5.42755	0.0156918
b	LT3-6	M	L	-6.98445	0.0047654
b	LT3-8	M	L	-6.53457	0.00672448
b	LT4-10	M	L	-5.70549	0.0126846
b	LT4-13	M	L	-6.09483	0.00941551
b	LT4-15	M	L	-7.16565	0.00414823
b	LT4-18	M	L	-7.40884	0.00344363
b	LT4-2	M	L	-6.97143	0.00481312
b	LT4-6	M	L	-5.3617	0.016503
a	LT3-2	M	L	-5.86554	0.011222
c	LT1-10	M	L	-7.16434	0.00415237
c	LT1-17	M	L	-6.04253	0.00980008
c	LT1-18	M	L	-6.23585	0.00845207
c	LT1-19	M	L	-5.45354	0.0153828
c	LT1-20	M	L	-4.89641	0.0235638
c	LT1-3	M	L	-4.08399	0.0438859
c	LT2-12	M	L	-6.34894	0.00775118
c	LT2-14	M	L	-6.20779	0.00863556
c	LT2-18	M	L	-4.93553	0.0228686
c	LT2-3	M	L	-6.79734	0.00549923
c	LT2-4	M	L	-4.91671	0.0232004
c	LT2-8	M	L	-3.98042	0.0475068
d	LT1-7	M	L	-6.57002	0.00654444
d	LT1-9	M	L	-7.56831	0.00304792
d	LT2-10	M	L	-6.78922	0.00553354
d	LT2-16	M	L	-5.36937	0.0164064
